# Supplementary material for: Dynamic interactions between the RNA chaperone Hfq, small regulatory RNAs, and mRNAs in live bacterial cells
Source: eLife. 2021 Feb 22;10:e64207. doi: 10.7554/eLife.64207 (PMC7987339; doi:10.7554/eLife.64207)
Supplement: Figure 1—figure supplement 1—source data 1. [file elife-64207-fig1-figsupp1-data1.xlsx]

## Sheet: growth-curve
				WT-LB				delta hfq-LB				hfq3xFlag-LB				hfq-mMaple-LB				WT-MOPS				delta-hfq-MOPS				hfq3xFlag-MOPS				hfq-mMaple-MOPS
	Min	Hrs		OD600	OD600	OD600		OD600	OD600	OD600		OD600	OD600	OD600		OD600	OD600	OD600		OD600	OD600	OD600		OD600	OD600	OD600		OD600	OD600	OD600		OD600	OD600	OD600
				R1	R2	R3		R1	R2	R3		R1	R2	R3		R1	R2	R3		R1	R2	R3		R1	R2	R3		R1	R2	R3		R1	R2	R3
0.00643519	9.26667	0.154444		-0.000484848	0.000515152	-0.000484848		-0.000484848	-0.000484848	-0.000484848		-0.00148485	-0.00148485	0.00151515		0.00251515	0.000515152	-0.000484848		-0.000242424	0.000757576	-0.000242424		-0.000242424	0.000757576	-0.000242424		-0.000242424	0.000757576	0.00275758		0.00175758	0.000757576	0.00375758
0.0133796	19.2667	0.321111		-0.000484848	0.000515152	-0.000484848		-0.000484848	-0.000484848	-0.000484848		-0.00148485	-0.00148485	0.00251515		0.00251515	0.000515152	-0.000484848		-0.000242424	0.000757576	-0.000242424		0.000757576	0.000757576	-0.000242424		-0.000242424	0.000757576	0.00275758		0.00175758	0.000757576	0.00375758
0.0203241	29.2667	0.487778		0.000515152	0.00151515	0.000515152		-0.000484848	-0.000484848	-0.000484848		-0.000484848	-0.000484848	0.00251515		0.00251515	0.00151515	0.000515152		0.000757576	0.00175758	-0.000242424		-0.000242424	0.000757576	0.000757576		0.000757576	0.00175758	0.00275758		0.00275758	0.00175758	0.00475758
0.0272685	39.2667	0.654444		0.00151515	0.00151515	0.000515152		-0.000484848	-0.000484848	-0.000484848		-0.000484848	-0.000484848	0.00251515		0.00351515	0.00251515	0.000515152		0.000757576	0.00175758	0.000757576		0.00475758	0.00275758	0.00275758		0.00175758	0.00175758	0.00375758		0.00275758	0.00275758	0.00475758
0.034213	49.2667	0.821111		0.00151515	0.00251515	0.00151515		-0.000484848	-0.000484848	-0.000484848		0.000515152	0.000515152	0.00351515		0.00451515	0.00351515	0.00151515		0.00175758	0.00275758	0.00175758		0.00275758	0.00375758	0.00375758		0.00175758	0.00275758	0.00475758		0.00375758	0.00375758	0.00575758
0.0411574	59.2667	0.987778		0.00351515	0.00451515	0.00351515		-0.000484848	-0.000484848	-0.000484848		0.00151515	0.00151515	0.00551515		0.00551515	0.00451515	0.00251515		0.00275758	0.00275758	0.00275758		0.00375758	0.00575758	0.00475758		0.00375758	0.00375758	0.00575758		0.00475758	0.00475758	0.00675758
0.0481019	69.2667	1.15444		0.00551515	0.00651515	0.00551515		-0.000484848	0.000515152	0.000515152		0.00351515	0.00351515	0.00651515		0.00751515	0.00551515	0.00451515		0.00475758	0.00475758	0.00375758		0.00475758	0.00675758	0.00575758		0.00475758	0.00575758	0.00675758		0.00675758	0.00575758	0.00875758
0.0550463	79.2667	1.32111		0.00851515	0.00951515	0.00751515		-0.000484848	-0.000484848	0.000515152		0.00651515	0.00551515	0.00951515		0.00951515	0.00851515	0.00751515		0.00675758	0.00675758	0.00575758		0.00675758	0.00775758	0.00675758		0.00675758	0.00775758	0.00875758		0.00875758	0.00875758	0.0107576
0.0619907	89.2667	1.48778		0.0115152	0.0125152	0.0125152		0.000515152	-0.000484848	0.000515152		0.00951515	0.00951515	0.0125152		0.0135152	0.0115152	0.0105152		0.00975758	0.00975758	0.00775758		0.00775758	0.00975758	0.00975758		0.00975758	0.00975758	0.0117576		0.0107576	0.0107576	0.0137576
0.0689352	99.2667	1.65444		0.0165152	0.0175152	0.0175152		0.000515152	0.000515152	0.00151515		0.0145152	0.0135152	0.0165152		0.0185152	0.0155152	0.0155152		0.0137576	0.0137576	0.0117576		0.0107576	0.0127576	0.0117576		0.0137576	0.0147576	0.0157576		0.0157576	0.0157576	0.0177576
0.0758796	109.267	1.82111		0.0245152	0.0245152	0.0245152		0.00151515	0.000515152	0.00151515		0.0205152	0.0205152	0.0235152		0.0245152	0.0225152	0.0215152		0.0177576	0.0197576	0.0177576		0.0137576	0.0157576	0.0147576		0.0187576	0.0197576	0.0207576		0.0207576	0.0207576	0.0217576
0.0828241	119.267	1.98778		0.0345152	0.0345152	0.0355152		0.00251515	0.00151515	0.00251515		0.0295152	0.0295152	0.0315152		0.0335152	0.0305152	0.0305152		0.0247576	0.0257576	0.0237576		0.0167576	0.0197576	0.0177576		0.0257576	0.0267576	0.0277576		0.0287576	0.0287576	0.0287576
0.0897685	129.267	2.15444		0.0495152	0.0485152	0.0505152		0.00351515	0.00251515	0.00351515		0.0435152	0.0425152	0.0445152		0.0465152	0.0435152	0.0425152		0.0337576	0.0357576	0.0337576		0.0207576	0.0247576	0.0227576		0.0347576	0.0377576	0.0377576		0.0377576	0.0377576	0.0387576
0.096713	139.267	2.32111		0.0675152	0.0675152	0.0685152		0.00551515	0.00251515	0.00551515		0.0605152	0.0595152	0.0615152		0.0645152	0.0595152	0.0595152		0.0427576	0.0477576	0.0457576		0.0267576	0.0307576	0.0287576		0.0467576	0.0497576	0.0497576		0.0487576	0.0497576	0.0517576
0.103657	149.267	2.48778		0.0855152	0.0845152	0.0845152		0.00751515	0.00451515	0.00751515		0.0785152	0.0775152	0.0795152		0.0805152	0.0775152	0.0765152		0.0617576	0.0647576	0.0627576		0.0337576	0.0387576	0.0357576		0.0657576	0.0677576	0.0677576		0.0677576	0.0687576	0.0687576
0.110602	159.267	2.65444		0.103515	0.101515	0.103515		0.0105152	0.00651515	0.0105152		0.0935152	0.0925152	0.0935152		0.0935152	0.0895152	0.0895152		0.0827576	0.0897576	0.0847576		0.0437576	0.0497576	0.0447576		0.0877576	0.0947576	0.0907576		0.0907576	0.0927576	0.0927576
0.117546	169.267	2.82111		0.135515	0.133515	0.134515		0.0145152	0.00851515	0.0135152		0.121515	0.119515	0.119515		0.119515	0.114515	0.113515		0.111758	0.121758	0.114758		0.0557576	0.0637576	0.0577576		0.120758	0.127758	0.122758		0.120758	0.123758	0.122758
0.124491	179.267	2.98778		0.160515	0.157515	0.158515		0.0205152	0.0125152	0.0175152		0.146515	0.146515	0.146515		0.147515	0.143515	0.143515		0.148758	0.160758	0.154758		0.0717576	0.0857576	0.0737576		0.161758	0.170758	0.164758		0.160758	0.163758	0.160758
0.131435	189.267	3.15444		0.187515	0.184515	0.186515		0.0275152	0.0165152	0.0245152		0.170515	0.170515	0.170515		0.167515	0.163515	0.163515		0.197758	0.207758	0.194758		0.0937576	0.111758	0.0957576		0.203758	0.210758	0.204758		0.199758	0.200758	0.200758
0.13838	199.267	3.32111		0.215515	0.213515	0.214515		0.0365152	0.0225152	0.0315152		0.199515	0.197515	0.198515		0.193515	0.187515	0.187515		0.227758	0.231758	0.220758		0.119758	0.142758	0.123758		0.229758	0.238758	0.231758		0.226758	0.229758	0.228758
0.145324	209.267	3.48778		0.254515	0.252515	0.252515		0.0485152	0.0295152	0.0425152		0.236515	0.234515	0.235515		0.230515	0.223515	0.222515		0.262758	0.269758	0.264758		0.158758	0.173758	0.162758		0.273758	0.286758	0.278758		0.270758	0.278758	0.271758
0.152269	219.267	3.65444		0.288515	0.286515	0.287515		0.0625152	0.0395152	0.0555152		0.270515	0.270515	0.269515		0.264515	0.257515	0.256515		0.312758	0.338758	0.339758		0.175758	0.199758	0.185758		0.352758	0.368758	0.366758		0.345758	0.363758	0.355758
0.159213	229.267	3.82111		0.342515	0.340515	0.342515		0.0765152	0.0515152	0.0685152		0.315515	0.311515	0.310515		0.303515	0.291515	0.289515		0.381758	0.389758	0.381758		0.203758	0.227758	0.210758		0.393758	0.410758	0.401758		0.402758	0.406758	0.403758
0.166157	239.267	3.98778		0.390515	0.388515	0.385515		0.0845152	0.0655152	0.0785152		0.364515	0.365515	0.360515		0.350515	0.339515	0.338515		0.419758	0.434758	0.429758		0.243758	0.277758	0.250758		0.445758	0.464758	0.452758		0.456758	0.459758	0.450758
0.173102	249.267	4.15444		0.432515	0.427515	0.423515		0.103515	0.0785152	0.0905152		0.405515	0.404515	0.399515		0.387515	0.377515	0.376515		0.469758	0.496758	0.485758		0.290758	0.310758	0.298758		0.501758	0.523758	0.504758		0.518758	0.516758	0.510758
0.180046	259.267	4.32111		0.470515	0.466515	0.464515		0.124515	0.0875152	0.111515		0.448515	0.447515	0.440515		0.425515	0.415515	0.413515		0.517758	0.543758	0.533758		0.316758	0.344758	0.324758		0.550758	0.576758	0.554758		0.567758	0.568758	0.559758
0.186991	269.267	4.48778		0.514515	0.509515	0.507515		0.141515	0.106515	0.130515		0.490515	0.491515	0.485515		0.468515	0.457515	0.456515		0.545758	0.587758	0.553758		0.354758	0.380758	0.360758		0.570758	0.589758	0.564758		0.584758	0.576758	0.581758
0.193935	279.267	4.65444		0.554515	0.549515	0.548515		0.163515	0.127515	0.148515		0.528515	0.531515	0.525515		0.506515	0.495515	0.494515		0.579758	0.586758	0.554758		0.390758	0.421758	0.396758		0.575758	0.589758	0.566758		0.582758	0.575758	0.580758
0.20088	289.267	4.82111		0.591515	0.586515	0.584515		0.183515	0.145515	0.169515		0.565515	0.569515	0.562515		0.542515	0.532515	0.530515		0.577758	0.587758	0.556758		0.440758	0.480758	0.446758		0.577758	0.590758	0.569758		0.579758	0.574758	0.579758
0.207824	299.267	4.98778		0.627515	0.620515	0.617515		0.206515	0.166515	0.190515		0.598515	0.603515	0.595515		0.575515	0.565515	0.564515		0.580758	0.590758	0.561758		0.486758	0.510758	0.493758		0.582758	0.593758	0.574758		0.583758	0.578758	0.581758
0.214769	309.267	5.15444		0.665515	0.657515	0.653515		0.227515	0.187515	0.212515		0.637515	0.636515	0.629515		0.608515	0.596515	0.594515		0.586758	0.593758	0.564758		0.516758	0.528758	0.526758		0.587758	0.597758	0.578758		0.586758	0.582758	0.585758
0.221713	319.267	5.32111		0.695515	0.691515	0.688515		0.253515	0.209515	0.234515		0.671515	0.674515	0.668515		0.646515	0.632515	0.631515		0.586758	0.594758	0.569758		0.527758	0.541758	0.536758		0.593758	0.600758	0.583758		0.591758	0.590758	0.592758
0.228657	329.267	5.48778		0.717515	0.713515	0.710515		0.284515	0.231515	0.260515		0.697515	0.702515	0.697515		0.677515	0.669515	0.669515		0.587758	0.600758	0.577758		0.530758	0.540758	0.541758		0.599758	0.606758	0.588758		0.591758	0.592758	0.596758
0.235602	339.267	5.65444		0.731515	0.729515	0.725515		0.316515	0.257515	0.290515		0.715515	0.721515	0.717515		0.697515	0.691515	0.691515		0.587758	0.602758	0.578758		0.530758	0.541758	0.541758		0.601758	0.608758	0.590758		0.593758	0.593758	0.597758
0.242546	349.267	5.82111		0.748515	0.746515	0.741515		0.351515	0.288515	0.321515		0.734515	0.740515	0.736515		0.715515	0.707515	0.707515		0.589758	0.604758	0.581758		0.531758	0.542758	0.542758		0.603758	0.610758	0.592758		0.594758	0.596758	0.598758
0.249491	359.267	5.98778		0.752515	0.752515	0.745515		0.398515	0.319515	0.358515		0.740515	0.750515	0.746515		0.726515	0.722515	0.722515		0.592758	0.607758	0.582758		0.533758	0.545758	0.544758		0.606758	0.612758	0.596758		0.597758	0.598758	0.600758
0.256435	369.267	6.15444		0.753515	0.753515	0.747515		0.434515	0.356515	0.403515		0.741515	0.752515	0.747515		0.728515	0.724515	0.725515		0.595758	0.609758	0.585758		0.541758	0.552758	0.553758		0.609758	0.617758	0.600758		0.600758	0.601758	0.607758
0.26338	379.267	6.32111		0.755515	0.755515	0.749515		0.462515	0.403515	0.435515		0.744515	0.754515	0.749515		0.730515	0.726515	0.727515		0.599758	0.613758	0.588758		0.540758	0.552758	0.553758		0.613758	0.619758	0.603758		0.604758	0.604758	0.606758
0.270324	389.267	6.48778		0.757515	0.755515	0.750515		0.490515	0.436515	0.461515		0.745515	0.755515	0.750515		0.732515	0.728515	0.728515		0.603758	0.617758	0.593758		0.541758	0.553758	0.554758		0.616758	0.623758	0.607758		0.607758	0.608758	0.610758
0.277269	399.267	6.65444		0.758515	0.756515	0.751515		0.524515	0.462515	0.494515		0.746515	0.757515	0.752515		0.733515	0.729515	0.730515		0.607758	0.621758	0.596758		0.542758	0.554758	0.555758		0.620758	0.626758	0.611758		0.611758	0.611758	0.618758
0.284213	409.267	6.82111		0.759515	0.758515	0.752515		0.550515	0.492515	0.525515		0.748515	0.758515	0.752515		0.733515	0.730515	0.731515		0.612758	0.625758	0.598758		0.544758	0.556758	0.557758		0.623758	0.630758	0.614758		0.616758	0.615758	0.617758
0.291157	419.267	6.98778		0.760515	0.759515	0.753515		0.565515	0.524515	0.547515		0.749515	0.759515	0.754515		0.735515	0.732515	0.732515		0.616758	0.629758	0.601758		0.545758	0.557758	0.558758		0.627758	0.634758	0.616758		0.620758	0.618758	0.620758
0.298102	429.267	7.15444		0.760515	0.759515	0.753515		0.574515	0.548515	0.557515		0.749515	0.759515	0.754515		0.735515	0.733515	0.732515		0.621758	0.631758	0.603758		0.547758	0.559758	0.560758		0.630758	0.636758	0.619758		0.624758	0.621758	0.624758
0.305046	439.267	7.32111		0.761515	0.760515	0.754515		0.590515	0.560515	0.567515		0.750515	0.759515	0.755515		0.735515	0.734515	0.733515		0.626758	0.634758	0.605758		0.548758	0.559758	0.561758		0.632758	0.639758	0.621758		0.626758	0.624758	0.627758
0.311991	449.267	7.48778		0.760515	0.760515	0.754515		0.602515	0.569515	0.593515		0.751515	0.759515	0.755515		0.735515	0.734515	0.733515		0.630758	0.635758	0.606758		0.548758	0.559758	0.562758		0.634758	0.641758	0.623758		0.626758	0.627758	0.630758
0.318935	459.267	7.65444		0.760515	0.760515	0.753515		0.600515	0.591515	0.591515		0.751515	0.760515	0.755515		0.734515	0.734515	0.733515		0.633758	0.637758	0.607758		0.547758	0.559758	0.561758		0.635758	0.643758	0.626758		0.630758	0.628758	0.635758
0.32588	469.267	7.82111		0.760515	0.759515	0.754515		0.598515	0.595515	0.588515		0.751515	0.759515	0.755515		0.735515	0.733515	0.734515		0.638758	0.638758	0.608758		0.547758	0.557758	0.561758		0.637758	0.645758	0.629758		0.632758	0.630758	0.635758
0.332824	479.267	7.98778		0.759515	0.760515	0.753515		0.597515	0.593515	0.587515		0.751515	0.759515	0.755515		0.734515	0.733515	0.733515		0.641758	0.639758	0.608758		0.547758	0.559758	0.561758		0.639758	0.646758	0.627758		0.630758	0.631758	0.636758
0.339769	489.267	8.15444		0.760515	0.759515	0.753515		0.596515	0.592515	0.587515		0.750515	0.759515	0.754515		0.734515	0.732515	0.733515		0.644758	0.640758	0.609758		0.549758	0.559758	0.562758		0.640758	0.647758	0.631758		0.631758	0.635758	0.639758
0.346713	499.267	8.32111		0.760515	0.759515	0.753515		0.595515	0.591515	0.586515		0.751515	0.759515	0.754515		0.733515	0.732515	0.733515		0.647758	0.640758	0.610758		0.550758	0.562758	0.566758		0.642758	0.647758	0.630758		0.632758	0.633758	0.640758
0.353657	509.267	8.48778		0.760515	0.758515	0.752515		0.594515	0.590515	0.585515		0.750515	0.758515	0.753515		0.733515	0.731515	0.733515		0.650758	0.641758	0.610758		0.553758	0.566758	0.569758		0.642758	0.649758	0.632758		0.633758	0.635758	0.642758
0.360602	519.267	8.65444		0.760515	0.757515	0.753515		0.593515	0.589515	0.584515		0.750515	0.757515	0.751515		0.732515	0.730515	0.733515		0.653758	0.642758	0.610758		0.556758	0.570758	0.573758		0.643758	0.650758	0.632758		0.633758	0.639758	0.643758
0.367546	529.267	8.82111		0.760515	0.758515	0.752515		0.592515	0.588515	0.585515		0.749515	0.756515	0.750515		0.731515	0.730515	0.732515		0.653758	0.643758	0.613758		0.560758	0.576758	0.580758		0.646758	0.651758	0.632758		0.636758	0.638758	0.643758
0.374491	539.267	8.98778		0.760515	0.757515	0.751515		0.591515	0.587515	0.584515		0.749515	0.755515	0.748515		0.730515	0.729515	0.731515		0.656758	0.644758	0.613758		0.566758	0.579758	0.583758		0.646758	0.652758	0.633758		0.637758	0.639758	0.647758
0.381435	549.267	9.15444		0.759515	0.757515	0.750515		0.590515	0.585515	0.584515		0.748515	0.753515	0.747515		0.729515	0.728515	0.731515		0.657758	0.645758	0.613758		0.568758	0.580758	0.582758		0.648758	0.653758	0.635758		0.639758	0.641758	0.648758
0.38838	559.267	9.32111		0.758515	0.756515	0.750515		0.589515	0.584515	0.582515		0.746515	0.751515	0.746515		0.727515	0.728515	0.731515		0.659758	0.646758	0.615758		0.567758	0.578758	0.581758		0.650758	0.655758	0.636758		0.641758	0.643758	0.647758
0.395324	569.267	9.48778		0.758515	0.755515	0.749515		0.588515	0.583515	0.582515		0.745515	0.750515	0.744515		0.727515	0.727515	0.731515		0.659758	0.647758	0.615758		0.566758	0.576758	0.578758		0.651758	0.657758	0.637758		0.644758	0.643758	0.649758
0.402269	579.267	9.65444		0.757515	0.754515	0.748515		0.586515	0.582515	0.581515		0.744515	0.748515	0.743515		0.726515	0.726515	0.730515		0.661758	0.647758	0.616758		0.563758	0.575758	0.576758		0.651758	0.656758	0.637758		0.645758	0.645758	0.649758
0.409213	589.267	9.82111		0.756515	0.753515	0.747515		0.585515	0.581515	0.579515		0.743515	0.747515	0.741515		0.725515	0.724515	0.730515		0.663758	0.648758	0.618758		0.562758	0.573758	0.574758		0.654758	0.657758	0.636758		0.647758	0.647758	0.653758
0.416157	599.267	9.98778		0.755515	0.751515	0.745515		0.583515	0.580515	0.578515		0.742515	0.745515	0.739515		0.723515	0.722515	0.728515		0.664758	0.649758	0.620758		0.559758	0.570758	0.573758		0.656758	0.660758	0.639758		0.647758	0.647758	0.656758
0.423102	609.267	10.1544		0.755515	0.751515	0.744515		0.582515	0.579515	0.577515		0.741515	0.743515	0.738515		0.722515	0.720515	0.727515		0.666758	0.652758	0.621758		0.557758	0.568758	0.570758		0.656758	0.662758	0.641758		0.649758	0.649758	0.654758
0.430046	619.267	10.3211		0.754515	0.749515	0.743515		0.581515	0.578515	0.577515		0.739515	0.742515	0.737515		0.720515	0.718515	0.726515		0.667758	0.657758	0.621758		0.555758	0.567758	0.569758		0.657758	0.663758	0.643758		0.651758	0.651758	0.659758
0.436991	629.267	10.4878		0.755515	0.747515	0.741515		0.580515	0.577515	0.576515		0.737515	0.741515	0.735515		0.719515	0.717515	0.724515		0.669758	0.653758	0.620758		0.553758	0.565758	0.567758		0.656758	0.662758	0.643758		0.653758	0.652758	0.661758
0.443935	639.267	10.6544		0.755515	0.745515	0.740515		0.579515	0.577515	0.576515		0.736515	0.739515	0.732515		0.717515	0.715515	0.723515		0.669758	0.653758	0.618758		0.552758	0.563758	0.565758		0.655758	0.661758	0.642758		0.654758	0.654758	0.662758
0.45088	649.267	10.8211		0.753515	0.744515	0.738515		0.579515	0.576515	0.575515		0.734515	0.737515	0.730515		0.715515	0.713515	0.722515		0.672758	0.651758	0.617758		0.550758	0.562758	0.563758		0.654758	0.659758	0.640758		0.654758	0.653758	0.659758
0.457824	659.267	10.9878		0.752515	0.741515	0.737515		0.578515	0.575515	0.575515		0.733515	0.736515	0.729515		0.714515	0.712515	0.720515		0.674758	0.651758	0.615758		0.549758	0.560758	0.562758		0.652758	0.658758	0.637758		0.654758	0.652758	0.660758
0.464769	669.267	11.1544		0.752515	0.741515	0.735515		0.577515	0.575515	0.574515		0.731515	0.734515	0.727515		0.712515	0.711515	0.718515		0.677758	0.651758	0.614758		0.548758	0.558758	0.560758		0.650758	0.656758	0.636758		0.652758	0.651758	0.659758
0.471713	679.267	11.3211		0.751515	0.739515	0.734515		0.577515	0.574515	0.573515		0.730515	0.733515	0.725515		0.710515	0.709515	0.717515		0.676758	0.650758	0.612758		0.546758	0.557758	0.558758		0.649758	0.655758	0.635758		0.650758	0.650758	0.656758
0.478657	689.267	11.4878		0.751515	0.738515	0.732515		0.577515	0.573515	0.572515		0.728515	0.732515	0.724515		0.709515	0.708515	0.715515		0.676758	0.647758	0.610758		0.544758	0.555758	0.557758		0.648758	0.655758	0.633758		0.648758	0.649758	0.656758
0.485602	699.267	11.6544		0.750515	0.737515	0.730515		0.577515	0.572515	0.571515		0.728515	0.729515	0.723515		0.707515	0.707515	0.715515		0.674758	0.646758	0.609758		0.545758	0.553758	0.556758		0.646758	0.652758	0.631758		0.649758	0.648758	0.655758
0.492546	709.267	11.8211		0.748515	0.736515	0.729515		0.577515	0.572515	0.569515		0.726515	0.727515	0.721515		0.706515	0.705515	0.714515		0.673758	0.644758	0.607758		0.541758	0.552758	0.554758		0.645758	0.651758	0.631758		0.646758	0.647758	0.654758
0.499491	719.267	11.9878		0.746515	0.734515	0.727515		0.576515	0.572515	0.568515		0.725515	0.725515	0.720515		0.704515	0.704515	0.713515		0.672758	0.642758	0.606758		0.540758	0.551758	0.552758		0.643758	0.650758	0.630758		0.647758	0.646758	0.653758
0.506435	729.267	12.1544		0.744515	0.733515	0.726515		0.576515	0.573515	0.567515		0.724515	0.725515	0.718515		0.703515	0.703515	0.712515		0.669758	0.640758	0.604758		0.538758	0.549758	0.551758		0.643758	0.649758	0.627758		0.645758	0.645758	0.651758
0.51338	739.267	12.3211		0.744515	0.731515	0.724515		0.573515	0.573515	0.566515		0.722515	0.723515	0.716515		0.701515	0.700515	0.710515		0.668758	0.639758	0.602758		0.537758	0.549758	0.551758		0.642758	0.647758	0.628758		0.644758	0.643758	0.650758
0.520324	749.267	12.4878		0.742515	0.729515	0.723515		0.573515	0.572515	0.565515		0.721515	0.721515	0.714515		0.700515	0.699515	0.709515		0.666758	0.637758	0.601758		0.536758	0.548758	0.550758		0.641758	0.646758	0.625758		0.643758	0.643758	0.650758
0.527269	759.267	12.6544		0.742515	0.728515	0.721515		0.572515	0.571515	0.564515		0.719515	0.719515	0.712515		0.698515	0.697515	0.708515		0.665758	0.636758	0.600758		0.535758	0.547758	0.549758		0.639758	0.645758	0.623758		0.642758	0.642758	0.648758
0.534213	769.267	12.8211		0.740515	0.726515	0.720515		0.571515	0.570515	0.563515		0.718515	0.718515	0.710515		0.696515	0.696515	0.706515		0.663758	0.635758	0.599758		0.534758	0.546758	0.548758		0.638758	0.643758	0.622758		0.642758	0.641758	0.646758
0.541157	779.267	12.9878		0.739515	0.724515	0.719515		0.570515	0.570515	0.562515		0.716515	0.717515	0.708515		0.695515	0.694515	0.705515		0.662758	0.634758	0.598758		0.534758	0.545758	0.547758		0.636758	0.642758	0.622758		0.640758	0.639758	0.645758
0.548102	789.267	13.1544		0.738515	0.723515	0.717515		0.568515	0.572515	0.562515		0.714515	0.714515	0.706515		0.693515	0.693515	0.703515		0.661758	0.633758	0.597758		0.533758	0.544758	0.546758		0.635758	0.641758	0.621758		0.639758	0.638758	0.644758
0.555046	799.267	13.3211		0.736515	0.722515	0.716515		0.568515	0.568515	0.561515		0.713515	0.713515	0.704515		0.691515	0.691515	0.702515		0.660758	0.633758	0.596758		0.532758	0.543758	0.545758		0.634758	0.640758	0.619758		0.638758	0.637758	0.644758
0.561991	809.267	13.4878		0.736515	0.721515	0.714515		0.567515	0.567515	0.560515		0.712515	0.711515	0.703515		0.689515	0.690515	0.701515		0.659758	0.631758	0.595758		0.530758	0.542758	0.544758		0.633758	0.638758	0.616758		0.637758	0.636758	0.642758
0.568935	819.267	13.6544		0.734515	0.719515	0.712515		0.566515	0.566515	0.559515		0.710515	0.709515	0.701515		0.687515	0.689515	0.700515		0.658758	0.629758	0.593758		0.530758	0.541758	0.543758		0.632758	0.638758	0.615758		0.635758	0.636758	0.641758
0.57588	829.267	13.8211		0.734515	0.718515	0.711515		0.565515	0.565515	0.557515		0.709515	0.707515	0.700515		0.685515	0.688515	0.698515		0.656758	0.628758	0.592758		0.528758	0.540758	0.542758		0.631758	0.637758	0.613758		0.635758	0.634758	0.641758
0.582824	839.267	13.9878		0.733515	0.717515	0.709515		0.564515	0.564515	0.556515		0.708515	0.705515	0.699515		0.684515	0.687515	0.698515		0.655758	0.626758	0.590758		0.527758	0.538758	0.541758		0.630758	0.635758	0.611758		0.634758	0.633758	0.639758
0.589769	849.267	14.1544		0.730515	0.715515	0.708515		0.563515	0.563515	0.554515		0.707515	0.704515	0.697515		0.683515	0.686515	0.697515		0.654758	0.625758	0.589758		0.525758	0.537758	0.540758		0.629758	0.634758	0.612758		0.633758	0.633758	0.639758
0.596713	859.267	14.3211		0.729515	0.714515	0.707515		0.562515	0.562515	0.552515		0.706515	0.703515	0.696515		0.681515	0.684515	0.696515		0.653758	0.624758	0.588758		0.524758	0.537758	0.540758		0.628758	0.633758	0.610758		0.632758	0.632758	0.638758
0.603657	869.267	14.4878		0.729515	0.713515	0.706515		0.560515	0.561515	0.551515		0.705515	0.701515	0.694515		0.680515	0.682515	0.695515		0.651758	0.622758	0.587758		0.523758	0.536758	0.539758		0.627758	0.632758	0.610758		0.631758	0.631758	0.636758
0.610602	879.267	14.6544		0.727515	0.712515	0.705515		0.559515	0.560515	0.549515		0.704515	0.700515	0.692515		0.679515	0.681515	0.694515		0.650758	0.622758	0.586758		0.522758	0.535758	0.539758		0.626758	0.631758	0.609758		0.630758	0.630758	0.636758
0.617546	889.267	14.8211		0.726515	0.710515	0.703515		0.557515	0.560515	0.547515		0.702515	0.698515	0.690515		0.677515	0.679515	0.691515		0.649758	0.620758	0.585758		0.520758	0.534758	0.537758		0.625758	0.630758	0.608758		0.629758	0.629758	0.634758
0.624491	899.267	14.9878		0.724515	0.709515	0.702515		0.556515	0.558515	0.546515		0.701515	0.697515	0.689515		0.676515	0.678515	0.691515		0.648758	0.620758	0.584758		0.519758	0.533758	0.537758		0.624758	0.630758	0.608758		0.628758	0.628758	0.633758
0.631435	909.267	15.1544		0.724515	0.708515	0.701515		0.555515	0.557515	0.544515		0.699515	0.696515	0.687515		0.675515	0.677515	0.690515		0.647758	0.619758	0.583758		0.518758	0.531758	0.536758		0.623758	0.627758	0.606758		0.627758	0.627758	0.633758
0.63838	919.267	15.3211		0.723515	0.706515	0.700515		0.554515	0.556515	0.543515		0.698515	0.694515	0.686515		0.673515	0.675515	0.688515		0.646758	0.618758	0.582758		0.517758	0.530758	0.535758		0.622758	0.627758	0.604758		0.626758	0.625758	0.632758
0.645324	929.267	15.4878		0.723515	0.705515	0.699515		0.553515	0.555515	0.541515		0.697515	0.693515	0.685515		0.672515	0.675515	0.687515		0.645758	0.618758	0.582758		0.517758	0.529758	0.534758		0.622758	0.627758	0.603758		0.625758	0.625758	0.632758
0.652269	939.267	15.6544		0.722515	0.704515	0.697515		0.552515	0.554515	0.540515		0.695515	0.691515	0.684515		0.670515	0.673515	0.686515		0.644758	0.616758	0.580758		0.514758	0.527758	0.533758		0.620758	0.625758	0.602758		0.624758	0.624758	0.631758
0.659213	949.267	15.8211		0.720515	0.703515	0.696515		0.550515	0.552515	0.538515		0.694515	0.690515	0.682515		0.669515	0.673515	0.685515		0.644758	0.616758	0.579758		0.513758	0.526758	0.531758		0.619758	0.625758	0.601758		0.623758	0.623758	0.631758
0.666157	959.267	15.9878		0.719515	0.702515	0.694515		0.549515	0.551515	0.537515		0.693515	0.688515	0.682515		0.668515	0.672515	0.684515		0.642758	0.614758	0.578758		0.511758	0.525758	0.530758		0.619758	0.624758	0.600758		0.623758	0.622758	0.631758
0.673102	969.267	16.1544		0.718515	0.701515	0.693515		0.548515	0.550515	0.535515		0.692515	0.687515	0.680515		0.667515	0.670515	0.683515		0.641758	0.613758	0.578758		0.510758	0.523758	0.529758		0.618758	0.623758	0.599758		0.622758	0.621758	0.629758
0.680046	979.267	16.3211		0.717515	0.700515	0.692515		0.547515	0.549515	0.533515		0.692515	0.685515	0.679515		0.666515	0.670515	0.682515		0.640758	0.612758	0.576758		0.509758	0.522758	0.528758		0.617758	0.622758	0.598758		0.621758	0.620758	0.628758
0.686991	989.267	16.4878		0.716515	0.699515	0.691515		0.546515	0.548515	0.531515		0.690515	0.685515	0.679515		0.665515	0.668515	0.682515		0.638758	0.611758	0.575758		0.507758	0.521758	0.528758		0.617758	0.621758	0.598758		0.620758	0.619758	0.627758
0.693935	999.267	16.6544		0.715515	0.698515	0.690515		0.544515	0.546515	0.529515		0.689515	0.683515	0.678515		0.664515	0.668515	0.681515		0.637758	0.611758	0.574758		0.506758	0.520758	0.527758		0.616758	0.620758	0.597758		0.619758	0.618758	0.626758
0.70088	1009.27	16.8211		0.714515	0.696515	0.688515		0.542515	0.546515	0.528515		0.689515	0.683515	0.676515		0.663515	0.666515	0.680515		0.637758	0.610758	0.574758		0.505758	0.519758	0.526758		0.615758	0.619758	0.597758		0.619758	0.617758	0.625758
0.707824	1019.27	16.9878		0.713515	0.695515	0.688515		0.541515	0.544515	0.527515		0.688515	0.683515	0.676515		0.662515	0.665515	0.680515		0.636758	0.609758	0.573758		0.504758	0.518758	0.525758		0.614758	0.618758	0.595758		0.617758	0.616758	0.625758
0.714769	1029.27	17.1544		0.712515	0.694515	0.687515		0.539515	0.543515	0.525515		0.686515	0.681515	0.674515		0.662515	0.664515	0.678515		0.635758	0.608758	0.572758		0.504758	0.517758	0.524758		0.613758	0.618758	0.594758		0.617758	0.616758	0.624758
0.721713	1039.27	17.3211		0.710515	0.693515	0.686515		0.538515	0.542515	0.523515		0.685515	0.681515	0.673515		0.661515	0.663515	0.677515		0.634758	0.607758	0.571758		0.503758	0.517758	0.523758		0.612758	0.616758	0.594758		0.615758	0.615758	0.623758
0.728657	1049.27	17.4878		0.710515	0.691515	0.685515		0.537515	0.541515	0.522515		0.684515	0.679515	0.672515		0.659515	0.662515	0.676515		0.633758	0.607758	0.571758		0.501758	0.515758	0.522758		0.611758	0.615758	0.592758		0.615758	0.615758	0.623758
0.735602	1059.27	17.6544		0.709515	0.691515	0.684515		0.535515	0.539515	0.521515		0.683515	0.679515	0.671515		0.658515	0.662515	0.675515		0.633758	0.606758	0.570758		0.501758	0.514758	0.521758		0.611758	0.615758	0.591758		0.615758	0.615758	0.622758
0.742546	1069.27	17.8211		0.710515	0.690515	0.683515		0.535515	0.537515	0.519515		0.682515	0.678515	0.671515		0.657515	0.661515	0.674515		0.632758	0.605758	0.569758		0.500758	0.513758	0.520758		0.610758	0.614758	0.591758		0.614758	0.614758	0.622758
0.749491	1079.27	17.9878		0.708515	0.689515	0.682515		0.534515	0.536515	0.520515		0.680515	0.676515	0.670515		0.657515	0.661515	0.673515		0.631758	0.604758	0.568758		0.499758	0.512758	0.519758		0.609758	0.613758	0.590758		0.613758	0.613758	0.621758
0.756435	1089.27	18.1544		0.708515	0.689515	0.681515		0.533515	0.535515	0.518515		0.680515	0.676515	0.669515		0.656515	0.660515	0.673515		0.630758	0.603758	0.568758		0.498758	0.511758	0.518758		0.609758	0.613758	0.589758		0.613758	0.613758	0.622758
0.76338	1099.27	18.3211		0.707515	0.688515	0.680515		0.532515	0.533515	0.516515		0.679515	0.675515	0.669515		0.655515	0.660515	0.673515		0.629758	0.603758	0.567758		0.497758	0.510758	0.516758		0.608758	0.612758	0.589758		0.613758	0.612758	0.621758
0.770324	1109.27	18.4878		0.706515	0.687515	0.679515		0.530515	0.532515	0.515515		0.679515	0.674515	0.668515		0.654515	0.660515	0.671515		0.629758	0.601758	0.566758		0.496758	0.509758	0.516758		0.607758	0.611758	0.588758		0.612758	0.611758	0.620758
0.777269	1119.27	18.6544		0.706515	0.685515	0.679515		0.528515	0.531515	0.513515		0.677515	0.673515	0.667515		0.654515	0.658515	0.671515		0.629758	0.601758	0.566758		0.496758	0.509758	0.516758		0.607758	0.611758	0.588758		0.611758	0.611758	0.619758
0.784213	1129.27	18.8211		0.705515	0.685515	0.678515		0.528515	0.530515	0.512515		0.678515	0.673515	0.667515		0.654515	0.657515	0.671515		0.627758	0.600758	0.565758		0.494758	0.507758	0.514758		0.606758	0.611758	0.588758		0.611758	0.611758	0.619758
0.791157	1139.27	18.9878		0.704515	0.685515	0.677515		0.526515	0.528515	0.511515		0.677515	0.672515	0.666515		0.653515	0.657515	0.670515		0.626758	0.600758	0.564758		0.493758	0.507758	0.514758		0.606758	0.611758	0.587758		0.610758	0.611758	0.618758
0.798102	1149.27	19.1544		0.704515	0.683515	0.677515		0.524515	0.527515	0.509515		0.676515	0.671515	0.665515		0.652515	0.656515	0.670515		0.626758	0.598758	0.563758		0.493758	0.507758	0.513758		0.605758	0.609758	0.587758		0.610758	0.610758	0.617758
0.805046	1159.27	19.3211		0.703515	0.683515	0.676515		0.523515	0.526515	0.508515		0.675515	0.671515	0.664515		0.651515	0.655515	0.669515		0.624758	0.598758	0.562758		0.493758	0.505758	0.512758		0.605758	0.608758	0.586758		0.608758	0.609758	0.617758
0.811991	1169.27	19.4878		0.703515	0.682515	0.675515		0.522515	0.524515	0.508515		0.674515	0.670515	0.663515		0.651515	0.654515	0.667515		0.624758	0.598758	0.562758		0.492758	0.505758	0.511758		0.604758	0.607758	0.585758		0.609758	0.608758	0.616758
0.818935	1179.27	19.6544		0.703515	0.681515	0.674515		0.521515	0.523515	0.505515		0.674515	0.670515	0.663515		0.650515	0.654515	0.666515		0.624758	0.597758	0.561758		0.491758	0.504758	0.510758		0.603758	0.607758	0.584758		0.608758	0.607758	0.616758
0.82588	1189.27	19.8211		0.703515	0.679515	0.673515		0.520515	0.522515	0.505515		0.674515	0.669515	0.662515		0.649515	0.654515	0.666515		0.623758	0.596758	0.560758		0.490758	0.503758	0.509758		0.602758	0.606758	0.583758		0.607758	0.607758	0.615758
0.832824	1199.27	19.9878		0.703515	0.679515	0.672515		0.519515	0.520515	0.504515		0.673515	0.668515	0.662515		0.649515	0.653515	0.665515		0.623758	0.596758	0.561758		0.490758	0.502758	0.508758		0.602758	0.606758	0.583758		0.607758	0.607758	0.614758
0.839769	1209.27	20.1544		0.702515	0.679515	0.671515		0.518515	0.519515	0.505515		0.673515	0.668515	0.661515		0.648515	0.653515	0.665515		0.622758	0.595758	0.560758		0.489758	0.501758	0.507758		0.601758	0.605758	0.582758		0.606758	0.606758	0.614758
0.846713	1219.27	20.3211		0.701515	0.678515	0.671515		0.517515	0.518515	0.503515		0.672515	0.667515	0.661515		0.648515	0.652515	0.665515		0.621758	0.594758	0.559758		0.488758	0.501758	0.507758		0.601758	0.604758	0.581758		0.606758	0.606758	0.614758
0.853657	1229.27	20.4878		0.701515	0.677515	0.670515		0.516515	0.517515	0.501515		0.671515	0.665515	0.660515		0.647515	0.652515	0.664515		0.620758	0.593758	0.558758		0.488758	0.500758	0.505758		0.600758	0.605758	0.581758		0.606758	0.605758	0.613758
0.860602	1239.27	20.6544		0.699515	0.677515	0.669515		0.515515	0.516515	0.501515		0.671515	0.665515	0.660515		0.646515	0.652515	0.664515		0.619758	0.593758	0.557758		0.489758	0.499758	0.505758		0.600758	0.603758	0.581758		0.605758	0.605758	0.613758
0.867546	1249.27	20.8211		0.699515	0.678515	0.670515		0.514515	0.514515	0.499515		0.671515	0.664515	0.659515		0.646515	0.651515	0.664515		0.618758	0.592758	0.556758		0.487758	0.499758	0.504758		0.599758	0.603758	0.580758		0.605758	0.604758	0.613758
0.874491	1259.27	20.9878		0.699515	0.677515	0.668515		0.513515	0.514515	0.498515		0.671515	0.664515	0.658515		0.645515	0.650515	0.664515		0.617758	0.591758	0.556758		0.486758	0.499758	0.503758		0.598758	0.602758	0.581758		0.603758	0.604758	0.612758
0.881435	1269.27	21.1544		0.699515	0.676515	0.669515		0.512515	0.512515	0.497515		0.670515	0.663515	0.657515		0.645515	0.649515	0.664515		0.617758	0.591758	0.555758		0.486758	0.498758	0.503758		0.598758	0.602758	0.580758		0.604758	0.603758	0.611758
0.88838	1279.27	21.3211		0.698515	0.675515	0.668515		0.511515	0.512515	0.495515		0.669515	0.662515	0.656515		0.644515	0.649515	0.663515		0.616758	0.590758	0.555758		0.485758	0.498758	0.502758		0.598758	0.602758	0.579758		0.602758	0.603758	0.611758
0.895324	1289.27	21.4878		0.697515	0.674515	0.668515		0.510515	0.511515	0.495515		0.669515	0.662515	0.655515		0.644515	0.648515	0.663515		0.615758	0.589758	0.554758		0.485758	0.497758	0.501758		0.598758	0.601758	0.579758		0.603758	0.602758	0.610758
0.902269	1299.27	21.6544		0.697515	0.674515	0.668515		0.509515	0.510515	0.494515		0.668515	0.662515	0.655515		0.643515	0.648515	0.663515		0.615758	0.589758	0.555758		0.484758	0.497758	0.501758		0.597758	0.600758	0.577758		0.602758	0.601758	0.610758
0.909213	1309.27	21.8211		0.697515	0.673515	0.667515		0.508515	0.508515	0.494515		0.668515	0.661515	0.654515		0.643515	0.647515	0.662515		0.614758	0.589758	0.553758		0.484758	0.496758	0.500758		0.596758	0.600758	0.577758		0.601758	0.601758	0.609758
0.916157	1319.27	21.9878		0.697515	0.673515	0.666515		0.507515	0.508515	0.493515		0.668515	0.661515	0.653515		0.642515	0.647515	0.662515		0.614758	0.588758	0.553758		0.483758	0.495758	0.499758		0.595758	0.599758	0.576758		0.601758	0.600758	0.608758
