# Supplementary material for: Dynamic interactions between the RNA chaperone Hfq, small regulatory RNAs, and mRNAs in live bacterial cells
Source: eLife. 2021 Feb 22;10:e64207. doi: 10.7554/eLife.64207 (PMC7987339; doi:10.7554/eLife.64207)
Supplement: Figure 1—figure supplement 2—source data 1. [file elife-64207-fig1-figsupp2-data1.xlsx]

## Sheet: Sheet1
	R1	sodB	16S	sodB/16S	sodB (Normalized)		R2	sodB	16S	sodB/16S	sodB (Normalized)
Hfq	Min after Dip	Signal	Signal				Min after Dip	Signal	Signal
WT	0	755000	8290000	0.0910736	0.999995		0	324000	5670000	0.0571429	0.999998
	2	491000	7460000	0.0658177	0.722684		2	316000	5900000	0.0535593	0.937286
	4	181000	7580000	0.0238786	0.262189		4	110000	6000000	0.0183333	0.320833
	6	83500	6500000	0.0128462	0.141052		6	35500	6110000	0.00581015	0.101677
	8	63200	7660000	0.00825065	0.0905928		8	58300	6090000	0.00957307	0.167528
	10	52500	7940000	0.00661209	0.0726013		10	78900	5720000	0.0137937	0.241389
	12	82100	7330000	0.0112005	0.122983		12	59500	5470000	0.0108775	0.190356
mMaple	0	520000	6790000	0.0765832	1		0	407000	6380000	0.0637931	1
	2	333000	6190000	0.0537964	0.702459		2	324000	5750000	0.0563478	0.883292
	4	215000	6760000	0.0318047	0.415298		4	173000	6470000	0.0267388	0.419149
	6	116000	6380000	0.0181818	0.237413		6	122000	7900000	0.015443	0.24208
	8	87900	6940000	0.0126657	0.165385		8	79500	6940000	0.0114553	0.17957
	10	58200	7300000	0.0079726	0.104104		10	70600	7480000	0.0094385	0.147955
	12	52700	6900000	0.00763768	0.0997308		12	67800	7090000	0.00956276	0.149903
	R1	ompA	16S	ompA/16S	ompA (Normalized)		R2	ompA	16S	ompA/16S	ompA (Normalized)		R3	ompA	16S	ompA/16S	ompA (Normalized)
	Time after ARA	Signal	Signal				Time after ARA	Signal	Signal				Time after ARA	Signal	Signal
WT	0	9620000	6120000	1.5719	1		0	4730000	5320000	0.889098	1		0	10900000	8380000	1.30072	1
	10	5170000	5110000	1.01174	0.643644		10	4380000	7430000	0.589502	0.663034		10	4480000	8050000	0.556522	0.427858
	20	4180000	5400000	0.774074	0.492446		20	2330000	6820000	0.341642	0.384257		20	4180000	8120000	0.514778	0.395765
	30	2390000	4840000	0.493802	0.314144		30	2670000	6240000	0.427885	0.481257		30	4020000	7930000	0.506936	0.389736
	40	3760000	5860000	0.641638	0.408194		40	2500000	5620000	0.44484	0.500327		40	4070000	9010000	0.45172	0.347286
mMaple	0	8260000	5300000	1.55849	1		0	7650000	5050000	1.51485	1		0	6280000	4640000	1.35345	1
	10	4950000	5710000	0.8669	0.556243		10	6320000	5010000	1.26148	0.83274		10	4720000	5580000	0.845878	0.62498
	20	5290000	5830000	0.907376	0.582214		20	3900000	4830000	0.807453	0.533025		20	3650000	5330000	0.684803	0.505969
	30	4950000	5600000	0.883929	0.56717		30	5460000	5560000	0.982014	0.648258		30	3780000	5000000	0.756	0.558573
	40	4810000	5650000	0.851327	0.546251		40	4140000	4670000	0.88651	0.585212		40	3110000	4650000	0.668817	0.494158
