# Supplementary material for: Dynamic interactions between the RNA chaperone Hfq, small regulatory RNAs, and mRNAs in live bacterial cells
Source: eLife. 2021 Feb 22;10:e64207. doi: 10.7554/eLife.64207 (PMC7987339; doi:10.7554/eLife.64207)
Supplement: Figure 1—figure supplement 3—source data 1. [file elife-64207-fig1-figsupp3-data1.xlsx]

## Sheet: panel b
One Step displacement (osd) (nm)
250 nm, fixed	400 nm, fixed	250 nm, NT	400 nm, NT	250 nm_Rif	400 nm, Rif
57.4748	57.4748	138.967	322.309	238.546	265.78
66.5295	66.5295	216.73	138.967	188.623	173.976
77.2312	77.2312	219.253	216.73	90.819	295.23
135.547	135.547	17.6083	219.253	66.0855	185.198
124.923	124.923	71.8459	17.6083	74.6779	354.419
176.543	176.543	192.568	71.8459	195.677	114.728
117.008	117.008	89.7987	192.568	71.6664	238.546
131.815	131.815	161.919	109.329	247.723	188.623
15.6597	15.6597	55.6688	317.149	132.601	195.677
70.6719	70.6719	109.138	89.7987	94.8208	71.6664
129.064	129.064	158.896	161.919	129.375	247.723
44.7178	44.7178	194.591	55.6688	230.047	90.819
78.7946	78.7946	39.7653	109.138	198.783	66.0855
83.9048	83.9048	158.37	158.896	86.9653	74.6779
122.642	122.642	97.0216	194.591	77.0443	132.601
166.632	166.632	220.934	39.7653	155.286	94.8208
57.7093	57.7093	9.29543	158.37	115.256	257.894
174.103	174.103	197.306	97.0216	175.87	107.089
100.244	100.244	112.624	220.934	15.0268	129.375
63.0537	63.0537	8.8469	9.29543	96.0784	230.047
156.559	156.559	10.8931	197.306	1.34628	198.783
221.035	221.035	44.8447	112.624	14.8413	86.9653
216.909	216.909	70.1396	8.8469	164.444	77.0443
139.841	139.841	62.301	10.8931	99.3879	155.286
72.9725	72.9725	128.218	44.8447	88.8013	224.787
44.5118	44.5118	233.323	70.1396	17.4828	115.256
183.752	183.752	196.401	62.301	142.438	175.87
115.229	115.229	140.74	128.218	160.832	15.0268
153.552	153.552	27.7953	233.323	78.1893	96.0784
127.806	127.806	11.7141	196.401	249.633	1.34628
54.5208	54.5208	22.645	140.74	241.08	14.8413
41.7345	41.7345	124.319	27.7953	85.5977	164.444
54.9098	54.9098	83.396	11.7141	116.528	99.3879
45.0511	45.0511	119.44	22.645	139.781	88.8013
35.7777	35.7777	99.3242	124.319	116.773	17.4828
25.727	25.727	73.0438	83.396	121.874	142.438
18.6163	18.6163	25.5365	119.44	107.157	160.832
79.4841	79.4841	18.5925	99.3242	172.555	78.1893
133.538	133.538	12.6787	73.0438	21.2641	249.633
97.3776	97.3776	9.53355	25.5365	158.827	215.932
94.4509	94.4509	13.9921	18.5925	70.2757	275.756
143.506	143.506	8.63689	12.6787	140.798	241.08
83.3976	83.3976	22.0548	9.53355	44.7902	85.5977
36.0572	36.0572	13.3179	13.9921	103.102	328.426
44.0871	44.0871	17.346	8.63689	41.8306	204.505
8.80865	8.80865	22.2796	22.0548	121.452	263.529
115.666	115.666	22.9912	13.3179	86.7319	71.7888
155.796	155.796	20.4258	17.346	143.608	301.265
31.6366	251.189	13.4572	22.2796	169.351	116.528
16.2188	31.6366	29.123	22.9912	142.06	139.781
33.3901	16.2188	14.8565	20.4258	173.728	116.773
52.4454	33.3901	1.19013	13.4572	193.334	121.874
25.3267	52.4454	17.1674	29.123	84.0102	107.157
34.0718	25.3267	18.9547	14.8565	102.564	172.555
29.4009	34.0718	107.466	1.19013	119.278	21.2641
29.8114	29.4009	69.8524	17.1674	145.375	158.827
33.2189	29.8114	17.2047	18.9547	159.922	362.658
20.0484	33.2189	39.0686	107.466	38.0968	308.919
32.9526	20.0484	101.573	69.8524	28.4026	140.798
142.54	32.9526	113.7	17.2047	53.8551	44.7902
56.029	142.54	141.652	39.0686	77.8903	329.585
49.7378	56.029	166.441	101.573	209.584	103.102
57.3691	49.7378	140.434	113.7	32.1682	41.8306
80.9071	57.3691	57.426	141.652	128.364	325.332
70.7477	80.9071	38.286	166.441	72.4205	22.7605
36.9795	70.7477	24.8168	140.434	115.123	121.452
98.349	36.9795	181.385	57.426	64.9041	86.7319
95.5785	98.349	216.108	38.286	82.077	250.005
30.4345	95.5785	21.3002	24.8168	79.5007	143.608
33.142	30.4345	53.634	314.43	35.9634	169.351
103.865	33.142	29.7511	181.385	35.2315	142.06
55.0596	103.865	208.284	216.108	142.998	173.728
56.4856	55.0596	135.458	21.3002	158.342	193.334
38.9155	336.089	162.873	53.634	66.7747	84.0102
61.134	56.4856	89.1016	29.7511	10.4604	102.564
117.314	38.9155	89.8908	276.715	201.283	119.278
66.4491	61.134	55.1564	208.284	51.5392	145.375
40.8044	117.314	95.289	66.271	99.04	159.922
61.2337	66.4491	47.405	301.634	156.981	38.0968
185.6	40.8044	76.6612	162.328	158.66	28.4026
238.624	61.2337	39.0987	270.151	170.228	53.8551
17.6916	185.6	119.87	162.873	248.09	229.399
24.9362	238.624	47.2353	89.1016	33.9638	266.708
13.2238	17.6916	24.0439	393.499	198.847	258.743
57.8653	24.9362	35.526	181.413	109.492	37.7351
75.9401	13.2238	9.99314	135.458	206.155	77.8903
92.7071	57.8653	59.8796	89.8908	52.0622	209.584
45.6794	75.9401	76.941	55.1564	145.673	32.1682
28.2372	92.7071	76.697	225.081	41.6089	128.364
36.051	45.6794	77.4286	95.289	104.116	72.4205
64.2084	28.2372	28.5145	47.405	160.24	115.123
89.5911	36.051	15.4102	76.6612	128.312	64.9041
65.1905	64.2084	24.2681	39.0987	210.865	82.077
142.278	89.5911	86.9966	119.87	28.3303	79.5007
27.0077	65.1905	104.232	47.2353	154.282	35.9634
113.192	146.691	92.4831	24.0439	121.03	35.2315
176.68	305.612	64.5115	35.526	209.151	153.829
14.1457	124.062	139.11	9.99314	163.817	142.998
82.6647	142.278	173.529	59.8796	206.827	158.342
76.8082	27.0077	69.2177	76.941	113.185	300.092
33.6341	113.192	154.912	76.697	54.0171	336.621
2.20228	176.68	201.624	77.4286	173.888	132.516
106.138	14.1457	102.025	28.5145	206.251	226.453
28.5725	82.6647	73.882	15.4102	121.041	312.04
38.5591	76.8082	30.6373	24.2681	100.356	66.7747
16.008	33.6341	89.7424	86.9966	27.2854	10.4604
31.9768	2.20228	87.667	104.232	109.805	201.283
10.481	106.138	64.1516	92.4831	57.8822	51.5392
22.1181	28.5725	57.1791	64.5115	203.203	99.04
15.657	38.5591	69.5545	139.11	49.5275	156.981
130.087	16.008	22.8694	173.529	61.9786	304.006
173.87	31.9768	77.3838	69.2177	42.0493	185.312
175.097	10.481	69.0364	154.912	87.9677	324.06
118.263	22.1181	22.7199	201.624	133.249	340.197
147.491	15.657	125.309	102.025	230.349	119.517
62.8062	130.087	89.7066	73.882	103.946	393.306
10.7988	173.87	113.909	30.6373	143.11	176.841
27.5126	175.097	23.7926	89.7424	47.1599	310.103
22.2767	118.263	98.1347	87.667	34.9607	79.5599
76.9007	147.491	236.681	64.1516	45.594	158.66
191.974	62.8062	235.095	57.1791	63.932	170.228
104.084	10.7988	179.854	69.5545	109.499	248.09
108.684	27.5126	99.0071	22.8694	136.199	33.9638
40.0798	22.2767	176.195	77.3838	54.8453	198.847
29.1956	76.9007	120.635	69.0364	179.312	109.492
17.8946	191.974	11.9391	22.7199	54.4471	300.815
22.7835	104.084	130.899	125.309	91.7479	52.0622
26.3899	108.684	49.3218	89.7066	22.8052	145.673
23.9761	40.0798	183.549	113.909	76.1215	41.6089
43.804	29.1956	148.439	23.7926	88.3513	206.155
141.095	17.8946	13.3107	98.1347	213.192	104.116
160.832	22.7835	15.4157	236.681	145.956	160.24
25.2147	26.3899	47.8059	235.095	240.106	128.312
140.113	23.9761	75.6271	179.854	216.463	210.865
131.485	43.804	15.4168	99.0071	129.311	28.3303
71.3791	141.095	106.008	176.195	161.936	154.282
74.5046	160.832	67.8175	120.635	161.443	121.03
16.8774	25.2147	27.5263	11.9391	170.536	209.151
19.6294	140.113	127.94	370.052	177.805	163.817
85.4957	131.485	31.3161	281.746	199.747	206.827
93.7659	71.3791	67.6985	72.5383	15.2717	343.23
110.838	74.5046	44.862	183.549	133.631	250.625
82.3179	16.8774	46.884	148.439	143.69	79.769
54.9897	19.6294	60.5709	130.899	133.084	113.185
226.462	85.4957	99.1723	49.3218	157.453	303.52
180.003	135.896	106.971	13.3107	78.6163	54.0171
53.2185	93.7659	207.706	15.4157	198.03	173.888
143.071	110.838	136.519	47.8059	77.8023	206.251
77.7402	82.3179	32.718	75.6271	162.571	302.647
99.4944	54.9897	54.9914	15.4168	58.5758	121.041
62.5803	226.462	53.9911	106.008	168.866	100.356
65.6657	180.003	64.5627	67.8175	153.71	334.304
31.1057	388.662	107.672	27.5263	181.767	158.172
206.436	99.4944	32.611	127.94	86.3573	271.369
71.5221	62.5803	30.8408	31.3161	84.5726	14.7995
126.546	65.6657	24.5318	67.6985	201.339	27.2854
34.768	53.2185	84.4486	44.862	176.786	109.805
53.6048	143.071	45.9789	46.884	178.677	57.8822
11.5759	77.7402	57.6826	60.5709	139.889	203.203
17.1513	31.1057	16.2372	99.1723	207.097	49.5275
19.9574	206.436	36.4279	106.971	181.106	61.9786
1.47093	71.5221	157.442	207.706	214.785	42.0493
35.0967	126.546	61.1252	136.519	150.63	87.9677
69.2907	34.768	82.3428	223.761	51.241	133.249
17.0251	53.6048	25.5392	32.718	43.297	369.744
30.7274	11.5759	61.528	54.9914	98.1735	313.764
47.1542	17.1513	239.725	53.9911	133.542	286.618
68.191	19.9574	86.7556	64.5627	147.107	229.777
76.6205	1.47093	88.3803	107.672	189.54	230.349
50.3121	35.0967	89.9156	32.611	96.828	103.946
60.0102	69.2907	85.6992	114.44	98.8777	143.11
17.7036	17.0251	240.329	285.025	42.2676	47.1599
29.6018	30.7274	222.068	30.8408	40.6544	34.9607
47.6905	47.1542	15.6311	24.5318	76.2922	45.594
12.3721	68.191	155.413	84.4486	90.3079	63.932
63.3773	76.6205	115.219	45.9789	208.231	109.499
26.5598	50.3121	79.7627	57.6826	62.2542	136.199
85.254	60.0102	114.716	16.2372	135.497	54.8453
69.6237	17.7036	89.0709	36.4279	226.491	316.725
36.7347	29.6018	46.0725	157.442	101.341	179.312
70.1612	47.6905	73.5867	61.1252	32.3119	54.4471
45.256	12.3721	52.1285	82.3428	130.269	91.7479
46.4829	63.3773	37.9491	25.5392	87.5409	314.97
122.764	26.5598	74.3719	61.528	110.531	305.207
98.5649	85.254	176.798	208.646	161.215	22.8052
102.555	69.6237	121.338	351.959	35.2469	76.1215
88.8613	36.7347	27.7029	239.725	41.7016	216.405
79.3337	70.1612	80.2149	86.7556	66.631	88.3513
43.2418	45.256	58.7882	88.3803	92.0544	213.192
55.2635	46.4829	104.216	259.099	147.773	145.956
29.6724	122.764	67.6123	155.413	44.1427	270.719
64.3917	98.5649	13.2129	115.219	98.325	361.153
55.0056	102.555	76.8207	89.9156	136.076	240.106
42.3096	88.8613	87.8885	85.6992	62.3849	216.463
45.0386	79.3337	102.311	240.329	11.8238	129.311
60.2729	43.2418	13.5492	222.068	83.3722	273.058
52.6481	55.2635	48.4817	15.6311	67.0036	161.936
180.18	29.6724	162.297	239.89	111.891	161.443
127.266	64.3917	217.317	259.883	201.964	301.069
37.2875	55.0056	88.3962	79.7627	121.861	217.117
66.4767	42.3096	18.0642	279.302	71.5482	170.536
64.1424	45.0386	39.4183	114.716	208.679	177.805
18.4825	60.2729	178.29	89.0709	116.295	199.747
190.232	52.6481	93.738	369.774	149.089	207.931
36.6523	180.18	73.3059	46.0725	206.769	15.2717
68.4733	127.266	54.5871	73.5867	70.0866	133.631
61.1313	37.2875	30.0949	52.1285	207.878	143.69
27.976	66.4767	167.59	37.9491	121.709	133.084
35.39	64.1424	150.648	74.3719	202.921	185.828
15.4598	18.4825	92.3197	176.798	234.545	157.453
50.9561	190.232	163.057	99.6371	25.6457	78.6163
48.579	36.6523	66.0862	73.9928	86.9209	198.03
70.2474	68.4733	190.181	385.541	131.336	77.8023
5.88983	61.1313	209.966	121.338	94.2282	162.571
25.6457	27.976	132.06	27.7029	236.005	58.5758
38.4065	35.39	39.3186	80.2149	119.871	168.866
36.184	15.4598	156.824	58.7882	131.59	269.185
4.95757	50.9561	46.2409	104.216	87.137	194.654
19.2294	48.579	156.723	67.6123	61.7498	107.4
41.7084	70.2474	243.027	13.2129	73.5667	258.737
10.8134	5.88983	173.763	76.8207	27.5077	309.842
56.2922	25.6457	51.6463	87.8885	61.5999	347.727
55.1855	38.4065	40.4357	102.311	24.5563	153.71
23.2667	36.184	36.306	13.5492	64.7565	181.767
12.6049	4.95757	77.6659	48.4817	100.13	254.275
25.7918	19.2294	102.639	162.297	118.066	86.3573
127.703	41.7084	92.53	217.317	32.3364	84.5726
77.2946	10.8134	44.9895	88.3962	6.53103	142.011
49.5847	56.2922	47.2057	18.0642	68.5894	321.34
12.7476	55.1855	28.8105	39.4183	230.008	201.339
32.8343	23.2667	126.677	178.29	50.882	176.786
8.69869	12.6049	80.5319	93.738	219.159	178.677
69.8217	25.7918	29.1455	73.3059	220.534	305.407
119.967	127.703	16.6403	54.5871	149.962	139.889
119.186	77.2946	77.5488	30.0949	234.884	207.097
52.4828	49.5847	42.3346	167.59	169.968	181.106
8.97517	12.7476	90.1917	150.648	91.3642	214.785
56.831	32.8343	78.7717	92.3197	109.015	261.816
38.4588	8.69869	244.36	163.057	232.476	392.337
5.30692	69.8217	149.345	66.0862	65.0864	342.631
76.2444	119.967	161.461	190.181	153.226	150.63
78.2185	119.186	99.7057	209.966	175.002	250.764
13.3959	52.4828	138.078	132.06	198.609	216.19
37.4897	8.97517	245.045	39.3186	177.733	375.191
12.7233	56.831	94.3311	156.824	208.983	51.241
59.446	38.4588	185.507	46.2409	237.387	43.297
57.105	5.30692	87.5703	156.723	169.677	98.1735
39.0404	76.2444	108.675	243.027	70.274	133.542
25.8164	78.2185	225.441	173.763	144.306	253.767
63.004	13.3959	130.843	51.6463	106.626	299.12
92.763	37.4897	38.886	40.4357	160.744	147.107
31.958	12.7233	37.7879	36.306	234.211	189.54
21.3656	59.446	32.7696	77.6659	34.3513	288.544
34.2113	57.105	59.9021	102.639	227.418	260.735
42.5022	39.0404	71.5956	92.53	114.465	115.44
16.0729	25.8164	225.137	44.9895	215.933	320.965
23.8691	63.004	219.527	47.2057	14.0607	258.071
111.857	92.763	168.933	28.8105	210.827	295.26
90.3605	31.958	154.517	126.677	61.85	109.863
64.8407	21.3656	102.895	80.5319	62.663	96.828
64.6366	34.2113	64.0443	29.1455	194.715	98.8777
98.4634	42.5022	214.517	16.6403	90.6645	42.2676
36.4655	16.0729	151.388	77.5488	192.637	40.6544
28.5911	23.8691	229.225	42.3346	58.1975	272.747
40.854	111.857	150.167	90.1917	174.775	342.062
24.0967	90.3605	131.264	78.7717	148.124	83.1307
25.8031	64.8407	105.577	244.36	122.659	341.27
25.6821	64.6366	212.666	149.345	155.772	353.904
43.8731	98.4634	131.99	159.797	97.6524	76.2922
76.522	36.4655	233.886	161.461	70.1583	90.3079
88.0387	28.5911	48.0402	293.173	81.1297	208.231
45.9659	40.854	160.04	99.7057	228.712	62.2542
32.3213	24.0967	225.036	138.078	184.624	52.7607
36.2383	25.8031	38.0871	245.045	68.3808	261.996
110.04	25.6821	48.0302	94.3311	177.357	298.257
41.9527	43.8731	162.957	185.507	202.976	267.33
15.5728	76.522	36.7412	87.5703	172.067	135.497
5.68034	88.0387	194.965	108.675	11.0557	226.491
26.5622	45.9659	15.0615	290.476	90.0802	101.341
80.3264	32.3213	110.799	82.9329	99.9755	32.3119
35.2527	36.2383	89.362	335.924	26.4919	334.632
29.2657	110.04	135.326	95.6833	110.24	50.3818
183.95	41.9527	56.5991	225.441	77.3581	358.315
71.183	15.5728	208.186	130.843	127.349	130.269
81.0066	5.68034	95.8566	38.886	39.8871	87.5409
48.0045	26.5622	175.703	37.7879	58.769	283.031
87.1664	80.3264	17.7823	32.7696	105.095	237.734
32.3923	35.2527	104.481	59.9021	226.639	110.531
51.3619	29.2657	91.7333	71.5956	210.717	161.215
69.2586	183.95	83.3503	225.137	204.295	35.2469
65.4884	71.183	59.1665	219.527	107.579	41.7016
32.9291	81.0066	39.3968	168.933	41.7824	66.631
44.1827	48.0045	105.146	154.517	55.4246	92.0544
58.9296	87.1664	79.1256	258.684	99.2294	280.965
69.227	32.3923	111.798	103.429	23.8989	98.325
49.2362	51.3619	42.9569	102.895	53.2435	136.076
70.5764	69.2586	51.2001	352.245	83.3619	147.773
46.7519	65.4884	76.1095	209.942	57.6706	44.1427
37.7926	32.9291	115.489	64.0443	237.754	62.3849
73.8185	44.1827	124.898	214.517	135.066	11.8238
155.722	58.9296	209.584	151.388	176.235	29.7041
48.2585	69.227	158.503	229.225	33.34	387.457
92.2817	49.2362	88.2165	150.167	103.143	27.6592
55.2168	70.5764	79.3958	131.264	181.726	83.3722
13.9759	46.7519	40.6952	253.946	112.587	67.0036
38.2378	37.7926	65.524	105.577	161.66	111.891
59.6825	73.8185	189.842	212.666	179.311	399.856
96.4616	155.722	240.899	131.99	135.982	287.79
28.0224	48.2585	56.9036	310.214	130.134	114.882
44.7671	92.2817	64.0952	152.155	151.854	321.958
25.9383	55.2168	170.981	233.886	88.4641	201.964
59.4718	13.9759	202.036	48.0402	130.55	121.861
43.9502	38.2378	56.3105	160.04	92.489	336.136
91.5755	59.6825	98.128	225.036	214.424	71.5482
77.9009	96.4616	241.425	38.0871	188.256	208.679
10.3507	28.0224	101.132	48.0302	145.026	60.4255
35.5721	44.7671	198.877	162.957	228.027	385.558
22.7291	25.9383	36.2363	36.7412	88.4248	163.082
103.302	59.4718	56.6087	194.965	106.415	315.814
69.4246	43.9502	127.949	133.191	118.011	147.298
93.619	91.5755	77.3302	257.273	191.794	116.295
85.3375	77.9009	132.011	101.254	59.9107	149.089
144.446	10.3507	177.16	15.0615	226.799	206.769
45.6856	35.5721	79.7425	110.799	198.974	70.0866
73.1442	22.7291	110.616	89.362	108.887	311.135
49.9313	103.302	70.193	135.326	67.0293	207.878
68.2175	69.4246	95.9231	56.5991	174.135	121.709
43.3803	93.619	55.5752	208.186	159.305	265.592
54.3166	85.3375	123.669	95.8566	158.394	156.516
52.8602	144.446	201.396	175.703	168.08	313.216
27.9106	45.6856	96.8446	17.7823	170.364	365.412
77.0904	73.1442	99.4539	390.568	36.84	202.921
66.5062	49.9313	110.169	307.969	112.19	234.545
86.7781	68.2175	184.729	104.481	63.6133	25.6457
34.4285	43.3803	222.268	91.7333	50.9519	86.9209
39.0401	54.3166	93.8985	83.3503	90.5527	131.336
31.9714	52.8602	62.3821	59.1665	33.3928	94.2282
63.378	27.9106	161.958	39.3968	241.653	295.723
39.8077	77.0904	62.0013	105.146	142.607	291.644
47.1042	66.5062	155.237	79.1256	203.169	236.005
21.2374	86.7781	55.7997	259.653	54.7523	211.092
20.9532	34.4285	114.367	283.93	44.8434	298.807
39.0476	39.0401	57.2112	198.521	105.846	119.871
53.5465	31.9714	92.9762	111.798	118.287	131.59
25.5492	63.378	144.784	42.9569	104.88	87.137
83.8583	39.8077	80.456	315.747	233.854	61.7498
67.3326	47.1042	135.333	206.938	66.5439	73.5667
76.5642	21.2374	59.7351	297.049	191.972	27.5077
45.9109	20.9532	184.143	37.221	118.04	61.5999
33.9058	39.0476	52.4804	51.2001	196.044	24.5563
47.53	53.5465	100.582	76.1095	158.123	217.68
51.8811	25.5492	50.1777	115.489	152.742	270.995
129.135	83.8583	21.0348	124.898	214.762	64.7565
105.231	67.3326	50.0841	209.584	87.8628	100.13
67.0884	76.5642	35.5001	354.123	67.8367	118.066
56.8719	45.9109	70.623	255.326	184.559	32.3364
24.7065	33.9058	39.7785	158.503	189.47	6.53103
17.5453	47.53	84.141	88.2165	193.052	68.5894
48.4867	51.8811	89.4307	79.3958	142.182	230.008
71.713	129.135	75.3542	40.6952	227.638	298.373
35.6185	105.231	110.702	65.524	132.699	50.882
21.0887	67.0884	247.805	189.842	77.8301	219.159
9.76533	56.8719	56.0966	240.899	174.455	220.534
66.3428	24.7065	130.577	56.9036	77.446	149.962
42.3874	17.5453	27.7237	64.0952	157.82	234.884
50.4639	48.4867	160.787	170.981	162.877	169.968
55.3875	71.713	46.1398	202.036	93.3304	91.3642
50.7401	35.6185	83.2281	56.3105	227.963	109.015
49.7813	21.0887	38.1381	98.128	214.912	328.565
40.6985	9.76533	58.2872	241.425	97.9551	221.086
8.38109	66.3428	115.487	101.132	225.127	264.106
12.2488	42.3874	80.7224	198.877	53.982	232.476
63.1692	50.4639	108.786	36.2363	40.7802	65.0864
64.3758	55.3875	19.7152	56.6087	166.283	153.226
8.06596	50.7401	42.8717	127.949	220.493	175.002
57.9014	49.7813	40.5695	77.3302	113.667	314.973
71.2153	40.6985	86.6659	132.011	41.1759	115.463
21.1376	8.38109	36.6629	177.16	138.098	344.993
30.8538	12.2488	108.184	79.7425	171.292	243.105
112.375	63.1692	70.252	110.616	110.136	196.944
84.3376	64.3758	39.5714	70.193	187.694	198.609
5.70084	8.06596	58.6772	95.9231	128.549	177.733
69.6716	57.9014	43.1574	143.604	69.893	208.983
21.1059	71.2153	162.095	55.5752	178.212	237.387
13.2548	21.1376	30.0452	294.591	171.88	169.677
30.6311	30.8538	78.999	123.669	188.297	70.274
28.6116	112.375	47.0451	201.396	92.7663	144.306
67.1964	84.3376	59.8006	96.8446	79.8019	106.626
49.6332	5.70084	57.7425	99.4539	248.07	160.744
129.648	69.6716	74.7642	110.169	131.543	234.211
52.6106	21.1059	27.4143	184.729	97.7518	34.3513
84.3356	13.2548	159.921	222.268	157.282	227.418
46.7835	30.6311	140.951	93.8985	153.712	114.465
87.1068	28.6116	215.31	62.3821	39.6631	215.933
115.804	67.1964	144.463	310.69	235.741	14.0607
44.7599	49.6332	80.7729	161.958	151.743	210.827
48.2774	129.648	34.9761	62.0013	194.848	61.85
51.2956	52.6106	71.0223	155.237	117.129	62.663
80.4175	84.3356	32.0606	55.7997	137.539	166.503
71.5236	46.7835	225.613	114.367	90.2202	146.704
22.3074	87.1068	181.309	57.2112	69.5323	315.658
21.4131	115.804	117.65	92.9762	200.971	33.5042
10.6693	44.7599	22.5297	135.333	159.348	318.512
25.0292	48.2774	85.0979	59.7351	190.598	202.745
68.9569	51.2956	166.444	184.143	74.4151	262.713
73.892	80.4175	37.9336	144.784	220.89	252.334
53.9637	71.5236	205.34	80.456	163.005	194.715
230.39	22.3074	179.215	399.686	66.4683	90.6645
121.069	21.4131	27.383	329.522	17.4897	192.637
92.0795	10.6693	90.2156	52.4804	29.5007	58.1975
89.1485	25.0292	218.247	100.582	17.2514	174.775
19.6888	68.9569	64.203	50.1777	116.181	148.124
64.7077	73.892	146.153	21.0348	24.8561	122.659
56.3357	53.9637	53.3412	50.0841	95.7496	155.772
51.4639	230.39	16.8668	35.5001	102.031	183.423
7.48858	121.069	167.482	70.623	193.67	341.703
34.6126	92.0795	95.6847	39.7785	80.5489	208.742
12.7487	89.1485	58.5416	84.141	94.7061	276.209
48.0161	19.6888	18.9244	89.4307	95.059	159.489
6.18947	64.7077	100.011	75.3542	189.45	97.6524
33.1707	56.8704	75.7369	110.702	205.843	70.1583
74.0041	57.4531	124.826	247.805	107.527	262.302
67.6208	56.3357	208.965	355.163	144.602	81.1297
55.581	51.4639	71.1806	56.0966	180.05	228.712
18.5003	7.48858	122.899	398.181	71.3405	263.855
22.7269	34.6126	65.2001	387.392	158.581	184.624
107.124	12.7487	173.533	130.577	33.9122	68.3808
40.5349	48.0161	135.429	27.7237	77.3733	177.357
57.3238	6.18947	25.767	160.787	80.2045	202.976
118.503	33.1707	172.64	46.1398	38.5038	172.067
42.7014	74.0041	189.955	83.2281	3.40145	11.0557
100.333	67.6208	139.868	38.1381	72.3004	295.007
17.554	55.581	66.8379	58.2872	180.081	114.061
28.6828	18.5003	75.0028	257.916	127.846	264.469
29.6107	22.7269	78.6377	115.487	69.4146	280.434
81.6481	107.124	82.5973	80.7224	92.9136	312.232
22.1946	40.5349	47.507	108.786	191.836	90.0802
83.5231	57.3238	27.101	19.7152	173.019	99.9755
37.2365	118.503	54.7038	42.8717	75.6501	334.215
31.5609	42.7014	75.1749	40.5695	71.7175	26.4919
147.574	100.333	160.37	86.6659	115.321	110.24
108.921	17.554	21.8589	36.6629	152.968	265.075
19.6489	28.6828	84.2348	108.184	161.91	333.262
145.613	29.6107	66.0076	70.252	66.3116	372.494
169.476	81.6481	115.45	39.5714	86.0399	77.3581
58.0961	22.1946	111.485	58.6772	120.586	127.349
17.1838	83.5231	104.56	43.1574	18.3457	39.8871
69.8278	37.2365	123.958	162.095	125.039	58.769
125.517	31.5609	175.831	155.15	212.937	105.095
18.5708	147.574	31.8	30.0452	103.19	226.639
47.2795	108.921	37.4739	78.999	163.015	210.717
26.4144	19.6489	97.0406	47.0451	102.778	299.376
21.7107	145.613	24.3592	59.8006	24.2698	324.9
21.5083	169.476	234.032	57.7425	247.784	204.295
32.9902	58.0961	118.831	74.7642	92.1169	107.579
89.5823	17.1838	12.613	27.4143	107.762	41.7824
7.90531	69.8278	75.5471	159.921	152.723	55.4246
89.9915	125.517	93.0301	140.951	248.562	298.666
114.764	18.5708	41.6511	267.322	88.7795	149.046
74.7873	47.2795	87.2233	215.31	248.906	301.757
136.548	26.4144	109.506	144.463	143.307	194.591
45.5498	21.7107	66.2221	80.7729	235.576	261.967
65.1652	21.5083	43.3884	34.9761	57.0506	285.371
37.1013	32.9902	142.606	71.0223	76.0298	99.2294
25.9754	89.5823	48.9204	32.0606	47.0495	23.8989
48.8057	7.90531	105.83	225.613	45.6076	53.2435
48.1512	89.9915	64.3953	181.309	171.583	219.775
57.8926	114.764	107.799	117.65	102.925	221.379
27.4758	74.7873	139.36	22.5297	170.159	83.3619
23.9615	136.548	128.164	262.529	220.727	57.6706
8.10979	45.5498	40.0476	103.453	134.121	237.754
18.2739	65.1652	54.2904	85.0979	103.729	135.066
199.282	37.1013	51.3865	166.444	164.76	176.235
111.916	25.9754	161.578	37.9336	140.973	33.34
56.171	48.8057	170.624	205.34	95.5173	103.143
108.694	48.1512	211.591	179.215	216.655	181.726
103.819	57.8926	34.821	27.383	153.984	254.714
116.899	27.4758	51.4677	90.2156	79.1051	167.489
19.3546	23.9615	87.3995	218.247	145.503	258.656
30.5402	8.10979	89.2716	64.203	215.434	239.287
15.9001	18.2739	154.367	242.867	188.314	112.587
10.4993	199.282	201.276	275.587	54.0459	161.66
65.3737	111.916	178.689	146.153	163.708	179.311
44.2442	56.171	240.585	53.3412	106.751	135.982
152.604	108.694	18.2807	16.8668	217.251	82.6399
16.0323	103.819	55.3033	167.482	212.276	7.16867
36.5697	116.899	78.6178	95.6847	45.5142	130.134
110.552	19.3546	82.7353	58.5416	88.7978	151.854
233.806	30.5402	94.2835	18.9244	218.313	217.709
83.6143	15.9001	141.352	100.011	80.73	283.945
12.2401	10.4993	176.409	75.7369	194.573	88.4641
25.9184	65.3737	181.539	124.826	80.8209	130.55
194.833	44.2442	56.8364	208.965	231.574	92.489
103.717	152.604	39.6692	71.1806	124.24	214.424
60.222	16.0323	99.6015	371.932	96.7854	188.256
135.535	36.5697	167.049	122.899	206.57	371.585
164.564	110.552	71.1051	65.2001	169.921	145.026
64.1607	233.806	40.8013	173.533	237.385	228.027
57.1728	254.904	31.0528	135.429	152.767	88.4248
41.2363	83.6143	188.513	25.767	40.9487	106.415
54.2458	12.2401	158.74	115.524	185.573	200.839
27.8304	25.9184	93.9398	287.135	85.1108	269.31
72.8887	374.223	82.8963	172.64	98.9764	226.993
112.717	194.833	55.6753	189.955	115.478	118.011
82.2332	103.717	22.5451	139.868	223.156	191.794
39.2193	60.222	42.5141	277.739	238.311	112.263
134.064	135.535	37.8327	66.8379	191.111	59.9107
18.7027	164.564	30.7362	75.0028	126.466	226.799
25.8024	64.1607	8.53206	78.6377	189.874	198.974
40.2668	57.1728	33.8538	82.5973	231.91	108.887
20.5259	41.2363	23.1948	47.507	99.5869	67.0293
21.2964	54.2458	85.4013	27.101	149.325	174.135
25.5573	27.8304	8.12218	54.7038	184.016	159.305
84.3615	72.8887	62.3067	75.1749	210.393	158.394
49.9798	112.717	84.4324	160.37	164.58	168.08
39.2825	82.2332	7.44555	21.8589	38.094	170.364
39.5236	39.2193	17.436	84.2348	155.202	36.84
88.377	134.064	61.94	66.0076	94.8034	112.19
39.0579	342.314	89.6816	115.45	29.1121	63.6133
23.1622	84.3615	34.499	111.485	114.209	50.9519
40.5957	394.073	40.2155	104.56	69.2319	90.5527
41.2507	39.2825	225.835	123.958	75.5183	33.3928
74.1271	39.5236	94.2846	175.831	135.013	241.653
83.1504	18.7027	31.0742	24.3592	145.16	142.607
87.2335	25.8024	148.983	234.032	66.3717	203.169
49.9517	40.2668	142.951	31.8	116.483	363.276
52.7364	20.5259	114.523	37.4739	247.266	54.7523
12.5176	21.2964	191.084	97.0406	143.921	44.8434
31.7654	25.5573	206.44	118.831	35.0199	105.846
62.9585	49.9798	137.214	12.613	34.3938	275.043
120.17	88.377	162.027	75.5471	108.068	60.1415
86.3241	39.0579	116.405	187.902	157.155	276.47
109.608	23.1622	247.2	98.0966	61.4585	118.287
17.462	40.5957	216.545	295.466	111.052	104.88
7.00946	41.2507	176.932	93.0301	74.5371	233.854
60.3564	74.1271	248.588	211.189	158.569	129.07
45.2766	83.1504	93.492	347.16	230.194	66.5439
50.1977	87.2335	157.251	153.118	42.6799	191.972
33.8041	49.9517	60.0334	41.6511	165.593	257.358
54.3534	52.7364	24.7591	87.2233	175.1	118.04
40.7897	62.9585	170.103	109.506	245.533	305.545
147.926	120.17	102.848	66.2221	125.268	87.8628
130.123	55.6103	49.1479	43.3884	114.588	67.8367
16.5927	256.538	62.46	142.606	230.409	196.044
35.2419	12.5176	30.2178	48.9204	222.376	158.123
72.0166	31.7654	83.5216	330.685	55.6459	152.742
86.1887	45.2766	62.2276	241.504	105.625	214.762
60.0576	86.3241	44.7351	176.048	235.335	184.559
75.9879	109.608	202.333	344.011	85.8236	189.47
68.3812	17.462	152.003	123.562	102.882	193.052
56.3093	7.00946	145.95	220.85	87.1137	142.182
19.6739	60.3564	105.608	264.491	104.757	300.394
13.9022	50.1977	142.146	105.83	174.999	22.6965
49.3377	33.8041	98.0148	64.3953	112.127	94.9951
44.8003	54.3534	34.572	107.799	154.442	372.52
35.3862	40.7897	70.2157	139.36	136.989	75.6203
114.589	147.926	204.906	128.164	111.291	324.7
78.9838	130.123	55.3333	40.0476	116.424	246.837
71.2185	16.5927	132.839	54.2904	214.119	282.49
12.51	35.2419	51.6369	51.3865	59.0094	108.203
60.7664	342.724	201.583	170.624	107.687	317.976
35.3638	72.0166	136.4	296.086	116.486	14.9529
17.2965	86.1887	187.422	289.463	225.912	330.769
23.9901	60.0576	127.811	211.591	87.2806	227.638
72.1516	75.9879	87.5135	161.578	184.327	132.699
241.069	68.3812	196.983	338.848	133.879	77.8301
55.6237	56.3093	93.1373	34.821	94.493	174.455
90.569	19.6739	77.2457	51.4677	174.464	306.992
52.1959	13.9022	75.0178	87.3995	126.422	291.628
21.139	49.3377	52.189	89.2716	150.726	393.598
22.5026	44.8003	87.9212	154.367	208.083	77.446
7.06441	35.3862	93.6487	201.276	186.297	272.189
34.6655	114.589	216.344	178.689	120.364	200.76
17.2899	78.9838	56.4748	240.585	172.759	347.708
29.1519	71.2185	66.5848	18.2807	103.451	60.9751
140.395	12.51	12.0353	55.3033	158.217	171.37
52.1201	60.7664	89.7011	36.7113	232.834	269.201
8.57376	35.3638	120.424	347.563	24.2719	164.618
28.9589	285.552	195.301	120.915	66.3471	313.673
58.963	72.1516	97.3423	78.6178	217.594	252.511
29.2299	241.069	190.68	82.7353	76.6245	314.921
17.7418	17.2965	108.326	130.081	211.742	75.3174
38.5811	23.9901	133.173	94.2835	174.152	278.162
86.7374	55.6237	157.995	141.352	156.949	93.3304
54.9174	90.569	186.002	176.409	170.168	157.82
38.4153	52.1959	96.9405	181.539	201.926	162.877
75.3016	21.139	36.5858	56.8364	177.214	84.4809
81.3741	22.5026	49.2443	153.381	187.82	315.94
85.0357	7.06441	56.1537	160.268	142.931	227.963
24.1042	34.6655	102.505	39.6692	115.411	214.912
24.0633	17.2899	72.4242	99.6015	151.133	97.9551
111.25	29.1519	29.8945	167.049	124.988	225.127
94.9019	140.395	23.9863	71.1051	158.675	53.982
46.3124	52.1201	14.4172	40.8013	80.044	40.7802
18.1189	8.57376	151.245	31.0528	176.116	166.283
38.9671	28.9589	129.764	188.513	86.4956	220.493
111.241	58.963	86.5892	158.74	51.1537	113.667
63.0422	29.2299	9.74523	93.9398	99.4405	357.118
12.1143	17.7418	121.942	293.09	182.688	215.272
14.8981	38.5811	135.421	107.988	106.178	372.136
64.1193	86.7374	11.6391	82.8963	171.647	367.786
53.7996	54.9174	57.5963	55.6753	16.0134	41.1759
57.8435	38.4153	52.227	22.5451	114.315	138.098
46.6879	75.3016	21.8896	42.5141	172.792	171.292
52.1675	81.3741	39.4304	37.8327	171.446	110.136
28.7161	85.0357	49.5292	30.7362	220.171	388.423
38.5453	24.1042	27.1003	8.53206	146.2	294.466
54.5094	24.0633	104.953	33.8538	79.7579	342.755
11.3171	111.25	41.5824	23.1948	140.601	343.339
22.9	94.9019	104.572	114.454	54.3843	187.694
13.5349	46.3124	8.65561	342.947	111.335	128.549
33.6435	18.1189	147.122	85.4013	187.664	69.893
42.8682	38.9671	190.493	49.9056	150.506	178.212
219.566	111.241	94.6707	8.12218	84.7126	171.88
34.5322	63.0422	180.745	62.3067	249.613	188.297
23.2755	12.1143	64.2152	84.4324	245.409	92.7663
199.439	14.8981	165.109	7.44555	70.4173	319.278
60.3376	64.1193	69.093	17.436	135.14	185.347
9.73912	53.7996	201.705	61.94	118.492	293.789
79.62	57.8435	181.922	89.6816	139.657	257.913
53.8261	46.6879	53.8036	34.499	172.687	79.8019
77.0707	52.1675	94.1436	40.2155	114.351	248.07
66.3096	28.7161	50.7099	126.248	41.311	131.543
23.4956	38.5453	63.4042	333.992	174.201	97.7518
31.527	54.5094	58.4383	225.835	196.156	157.282
18.1666	11.3171	70.7041	94.2846	28.038	153.712
54.7781	22.9	75.2291	31.0742	193.246	39.6631
15.7669	13.5349	90.2323	148.983	198.475	235.741
58.5827	33.6435	185.808	142.951	144.841	321.265
29.7801	42.8682	36.6391	114.523	192.821	151.743
22.4157	219.566	187.205	191.084	132.326	194.848
85.6791	34.5322	59.9247	206.44	36.246	291.1
53.5617	388.104	39.0294	105.398	213.992	117.129
213.049	53.0842	67.1204	318.873	116.988	137.539
48.1175	23.2755	33.8433	137.214	227.09	90.2202
149.665	199.439	51.1089	162.027	107.078	69.5323
131.553	60.3376	28.4701	116.405	202.072	200.971
44.6879	9.73912	85.485	247.2	134.468	159.348
88.0004	79.62	43.8543	216.545	84.466	190.598
28.6028	53.8261	107.322	176.932	160.082	74.4151
22.2731	77.0707	169.886	248.588	247.593	220.89
32.4003	66.3096	56.5102	93.492	101.789	163.005
94.0357	23.4956	174.894	157.251	158.195	66.4683
108.328	367.899	150.302	60.0334	216.733	17.4897
121.638	31.527	216.433	24.7591	133.175	286.066
53.8882	18.1666	51.5491	170.103	229.654	300.956
30.6021	54.7781	155.671	102.848	89.2623	204.434
13.3102	15.7669	118.155	49.1479	49.5054	279.819
37.5054	58.5827	70.5834	62.46	230.108	29.5007
32.9396	29.7801	48.4066	30.2178	129.066	17.2514
44.7797	22.4157	68.433	83.5216	68.1311	272.416
47.3206	85.6791	100.715	221.199	156.885	37.2345
27.5152	53.5617	132.183	303.655	161.816	253.65
155.949	213.049	65.021	62.2276	208.665	379.256
58.7442	48.1175	2.23609	44.7351	224.884	116.181
94.1654	149.665	60.7589	202.333	117.678	24.8561
38.2607	131.553	119.267	276.665	163.917	292.463
60.5596	44.6879	103.007	204.424	200.256	95.7496
52.3014	88.0004	73.7831	281.816	224.41	102.031
31.8065	28.6028	52.7064	362.836	213.312	193.67
46.9108	22.2731	91.4651	152.003	60.3714	80.5489
27.898	32.4003	212.787	145.95	182.807	94.7061
11.4052	94.0357	97.1544	105.608	161.498	95.059
11.7893	108.328	172.906	142.146	101.765	358.177
24.6764	121.638	112.488	98.0148	82.3289	179.265
23.8393	53.8882	14.4676	34.572	102.479	305.048
24.1285	30.6021	84.1477	70.2157	179.995	380.275
48.1453	13.3102	73.0837	204.906	78.8781	149.789
96.2853	37.5054	97.232	55.3333	95.8977	365.606
38.5437	32.9396	132.228	132.839	154.018	189.45
58.6947	44.7797	187.521	51.6369	61.9287	205.843
17.7034	47.3206	67.4042	201.583	93.4319	363.62
36.9213	27.5152	48.6882	136.4	227.363	304.477
20.4022	155.949	46.184	187.422	72.9451	107.527
41.5587	58.7442	121.207	127.811	149.809	144.602
29.416	94.1654	131.68	87.5135	105.747	310.65
12.7968	38.2607	238.603	153.761	61.1158	330.082
33.1264	111.791	200.525	288.424	123.234	102.627
25.6825	60.5596	33.2472	196.983	172.187	58.5829
22.449	52.3014	48.0087	93.1373	150.006	180.05
89.3776	31.8065	119.268	348.789	61.9239	71.3405
41.4971	46.9108	67.124	314.306	130.139	330.797
45.4415	27.898	187.752	362.496	101.048	158.581
114.306	11.4052	140.64	61.2071	220.329	33.9122
12.4428	11.7893	107.806	279.56	70.9887	77.3733
39.8117	24.6764	24.5435	77.2457	151.527	80.2045
34.1929	23.8393	49.1858	75.0178	152.405	38.5038
144.971	24.1285	24.3931	52.189	107.325	3.40145
57.8497	48.1453	38.5605	87.9212	123.56	72.3004
91.3079	96.2853	61.304	56.4748	106.495	180.081
48.4004	38.5437	15.0102	66.5848	132.175	127.846
27.7771	58.6947	33.7048	93.6487	85.9045	50.0629
17.135	17.7034	40.0424	216.344	205.049	314.861
8.40021	36.9213	225.345	12.0353	143.402	171.543
24.2266	20.4022	103.049	89.7011	93.5536	378.363
27.9974	41.5587	45.0857	120.424	101.295	92.5233
46.4375	29.416	49.888	195.301	129.328	346.131
44.7765	12.7968	179.915	97.3423	140.191	223.168
27.7638	33.1264	110.428	190.68	214.772	148.578
21.3329	25.6825	48.9373	108.326	70.06	280.158
46.9953	22.449	151.365	133.173	135.589	3.06968
50.8927	266.653	214.119	157.995	45.9593	69.4146
67.3858	89.3776	187.453	259.343	60.2364	92.9136
76.5376	41.4971	103.198	167.825	202.676	191.836
19.4905	45.4415	62.7936	275.782	196.013	173.019
89.6359	114.306	20.3066	186.002	248.169	75.6501
54.1128	12.4428	39.1737	96.9405	141.18	71.7175
56.9245	39.8117	113.623	36.5858	135.983	115.321
15.4172	34.1929	49.6649	49.2443	172.806	152.968
24.4619	144.971	56.829	56.1537	97.9703	161.91
32.2547	57.8497	50.7823	102.505	166.863	295.595
23.4132	91.3079	90.3706	72.4242	75.9256	94.0395
10.0185	48.4004	192.596	29.8945	132.024	66.3116
21.9259	27.7771	101.265	23.9863	169.005	86.0399
36.213	17.135	20.372	14.4172	162.015	120.586
29.1876	8.40021	46.8448	151.245	178.313	91.6549
18.2336	24.2266	30.3563	129.764	159.872	160.433
18.7537	27.9974	34.1317	86.5892	213.744	18.3457
40.5189	46.4375	19.9121	9.74523	131.925	125.039
25.4148	44.7765	61.0032	121.942	206.849	212.937
40.4618	27.7638	22.3513	135.421	121.003	264.379
63.6002	21.3329	177.276	11.6391	40.3877	103.19
71.3418	46.9953	72.1594	57.5963	52.3149	163.015
40.2428	50.8927	22.6233	52.227	95.7532	102.778
31.1259	67.3858	47.6243	21.8896	110.909	161.165
73.0886	76.5376	10.6765	39.4304	222.793	250.287
75.2269	19.4905	50.3987	49.5292	168.074	24.2698
52.8169	89.6359	71.9201	27.1003	126.111	247.784
25.4814	54.1128	95.099	104.953	137.139	265.292
72.6399	56.9245	55.401	41.5824	164.902	299.572
63.8374	15.4172	41.7929	104.572	223.802	92.1169
76.6399	24.4619	248.425	8.65561	211.112	107.762
56.0639	32.2547	73.4603	147.122	146.987	152.723
19.9847	372.764	14.838	182.946	58.6192	383.625
44.0194	72.6399	59.9284	326.475	52.1024	107.471
16.7615	63.8374	76.3084	190.493	94.4449	215.179
109.9	76.6399	64.4793	94.6707	51.4636	248.562
29.4885	23.4132	50.9176	180.745	238.429	88.7795
23.1459	10.0185	165.439	64.2152	145.895	248.906
97.6285	21.9259	156.342	165.109	82.4458	143.307
92.6847	36.213	119.801	69.093	74.28	235.576
50.5549	29.1876	76.3111	201.705	146.758	290.399
40.4888	18.2336	45.365	54.3819	94.9859	312.082
15.5522	18.7537	18.0075	181.922	27.5409	57.0506
44.6826	40.5189	47.5322	53.8036	46.245	76.0298
124.972	25.4148	74.2268	93.8316	121.731	47.0495
248.252	40.4618	28.8406	317.522	70.9233	45.6076
24.5659	63.6002	143.045	94.1436	94.6877	171.583
27.9623	71.3418	220.606	50.7099	54.291	102.925
1.60376	40.2428	43.4693	63.4042	107.672	373.079
28.9354	31.1259	123.582	30.9727	212.611	170.159
60.9355	73.0886	98.9777	58.4383	68.7508	220.727
140.378	75.2269	184.505	70.7041	60.9615	155.761
103.31	52.8169	194.917	75.2291	148.453	304.287
37.6506	25.4814	63.932	90.2323	32.9038	164.76
67.289	58.7553	135.69	185.808	30.2313	140.973
15.1509	258.219	33.1436	36.6391	51.6008	134.121
145.945	202.095	52.3504	187.205	32.888	103.729
144.658	261.357	119.776	252.323	85.2182	95.5173
85.5605	58.8891	105.045	67.1204	71.3158	216.655
56.8034	56.0639	104.951	33.8433	95.9488	265.132
81.3835	19.9847	112.9	59.9247	55.2286	199.544
8.3054	44.0194	54.7023	39.0294	59.9785	305.308
29.8056	16.7615	99.0814	51.1089	138.844	277.348
91.1759	109.9	95.8603	28.4701	52.6469	57.4548
37.5171	29.4885	28.7923	85.485	35.2772	204.891
39.8167	23.1459	68.2489	43.8543	146.9	344.639
16.8383	97.6285	61.9175	107.322	36.4516	289.886
96.092	92.6847	13.5679	169.886	115.9	393.49
108.398	50.5549	67.1833	56.5102	141.202	327.645
31.878	40.4888	40.2831	174.894	172.427	335.055
27.3338	15.5522	12.5606	150.302	83.468	153.984
11.4965	44.6826	36.1013	216.433	136.171	133.618
60.837	124.972	14.6811	51.5491	203.907	79.1051
34.9597	248.252	131.863	155.671	169.336	145.503
65.7821	24.5659	157.954	118.155	196.075	215.434
43.7376	51.933	77.4579	70.5834	31.0548	188.314
4.96788	27.9623	24.3107	48.4066	36.245	54.0459
20.9455	1.60376	88.1493	68.433	151.871	163.708
43.4172	28.9354	65.2845	100.715	243.433	361.639
68.4377	60.9355	116.341	132.183	104.775	106.751
30.9142	140.378	42.2429	65.021	82.3743	217.251
27.2683	103.31	46.2761	2.23609	78.2558	212.276
208.1	37.6506	34.8444	60.7589	147.349	45.5142
92.0957	67.289	138.629	119.267	145.636	88.7978
52.5158	15.1509	33.3562	103.007	158.144	117.701
40.0379	145.945	38.9434	73.7831	218.79	218.313
57.5835	144.658	22.0361	52.7064	143.852	80.73
78.4525	85.5605	36.0206	91.4651	191.637	194.573
78.8444	56.8034	58.4287	212.787	64.8031	80.8209
73.405	81.3835	50.1134	97.1544	180.124	294.01
77.5469	8.3054	25.9264	172.906	121.883	359.065
77.7056	29.8056	29.2326	112.488	113.998	222.222
128.552	91.1759	40.3988	26.5309	173.35	386.559
168.805	37.5171	61.1092	14.4676	33.2249	268.045
33.032	39.8167	91.5389	84.1477	59.0834	157.605
40.7658	16.8383	163.428	73.0837	89.005	192.937
103.245	126.777	130.747	97.232	75.4335	324.274
23.6278	96.092	141.652	132.228	137.259	231.574
17.9988	108.398	86.6323	187.521	130.333	124.24
152.645	31.878	75.2793	67.4042	76.1237	184.385
76.3961	27.3338	63.8805	48.6882	91.0011	332.89
15.9331	11.4965	82.7519	46.184	193.613	386.846
50.2362	60.837	58.3724	121.207	88.3646	258.424
51.8853	34.9597	75.6247	131.68	59.5874	317.744
42.905	65.7821	35.2286	238.603	66.0839	179.205
32.4607	43.7376	75.6527	200.525	94.7376	228.423
40.7122	4.96788	136.434	33.2472	194.054	131.955
19.7019	20.9455	164.112	48.0087	106.484	96.7854
53.816	43.4172	225.731	119.268	104.102	206.57
41.0781	68.4377	115.123	67.124	116.21	169.921
59.4003	30.9142	27.1116	187.752	116.817	260.778
92.791	27.2683	83.1762	140.64	39.5384	237.385
61.3414	208.1	50.0708	107.806	93.1208	152.767
38.2687	92.0957	34.198	24.5435	46.9659	40.9487
56.6723	52.5158	61.3145	49.1858	72.8302	185.573
43.104	40.0379	76.6229	24.3931	55.3401	85.1108
76.6427	57.5835	160.485	38.5605	80.2079	245.772
112.78	71.5897	30.8642	61.304	88.4944	98.9764
31.6406	266.41	98.7463	15.0102	12.308	115.478
53.0987	124.891	31.5558	33.7048	143.208	223.156
50.6057	78.4525	18.0777	40.0424	82.219	238.311
97.5032	78.8444	38.2084	225.345	25.2796	191.111
64.598	73.405	57.741	103.049	65.1254	251.189
23.703	77.5469	80.5338	45.0857	99.2432	374.544
89.3528	77.7056	70.1494	49.888	179.946	216.87
13.2	128.552	73.705	179.915	51.2355	126.466
65.2395	168.805	95.8237	110.428	81.7104	189.874
106.707	33.032	87.7915	48.9373	216.274	365.491
58.124	40.7658	68.7062	27.6587	203.385	231.91
39.8934	103.245	94.8385	299.327	216.472	99.5869
37.4518	23.6278	56.256	151.365	198.053	359.496
25.7326	17.9988	144.963	214.119	133.056	211.43
82.317	152.645	236.97	187.453	148.859	149.325
24.7192	325.627	49.6234	261.36	88.3598	184.016
47.7965	76.3961	64.3855	257.388	166.632	210.393
55.0267	15.9331	19.1209	103.198	62.3821	29.1121
24.885	50.2362	73.2701	62.7936	23.6376	114.209
122.46	51.8853	51.2108	20.3066	206.899	164.58
60.395	42.905	6.60925	39.1737	80.7468	38.094
31.064	32.4607	45.7657	113.623	110.857	155.202
113.183	40.7122	90.7271	49.6649	166.385	94.8034
146.289	19.7019	35.2217	56.829	203.025	69.2319
123.368	53.816	31.1288	50.7823	102.001	75.5183
16.2559	41.0781	40.5979	324.47	51.7068	135.013
26.2525	59.4003	125.018	90.3706	184.365	145.16
18.0105	92.791	94.9012	192.596	181.599	66.3717
31.4454	61.3414	43.7865	101.265	107.865	271.663
48.7354	38.2687	115.945	20.372	173.411	193.367
37.8951	56.6723	49.7762	46.8448	22.3663	254.965
81.3367	43.104	46.5816	30.3563	138.082	271.2
96.2838	76.6427	233.182	34.1317	30.5071	363.691
50.9475	112.78	147.455	361.095	67.5516	140.76
58.8467	31.6406	102.014	19.9121	42.4271	339.874
99.5969	53.0987	77.9632	61.0032	87.7606	185.779
58.5321	50.6057	69.6036	22.3513	164.356	116.483
80.7045	97.5032	67.4437	177.276	139.151	247.266
49.1429	47.829	34.7131	72.1594	144.891	143.921
113.138	64.598	16.8107	22.6233	63.4194	291.674
147.878	23.703	104.66	47.6243	209.776	35.0199
7.82945	89.3528	67.1037	10.6765	220.841	34.3938
111.834	13.2	103.27	50.3987	243.698	108.068
93.6515	316.669	33.1808	71.9201	243.074	157.155
68.9964	65.2395	21.3596	95.099	45.2453	267.725
38.8532	106.707	168.766	55.401	182.364	164.219
43.5625	58.124	99.6781	41.7929	149.007	253.86
97.6352	39.8934	200.89	248.425	61.6997	390.329
117.925	37.4518	220.509	73.4603	189.47	359.049
170.96	25.7326	118.654	14.838	108.113	338.995
5.3356	82.317	117.943	59.9284	94.6773	61.4585
12.985	24.7192	39.5797	76.3084	214.609	56.5364
32.1351	126.136	97.3444	64.4793	137.924	276.869
100.369	279.664	145.237	50.9176	127.539	111.052
82.0403	47.7965	247.931	165.439	145.734	277.151
106.649	55.0267	114.956	156.342	77.1542	74.5371
81.9142	24.885	152.648	119.801	166.291	158.569
35.5069	122.46	105.623	76.3111	138.242	230.194
34.0017	60.395	77.3848	45.365	145.306	42.6799
11.2929	31.064	141.453	18.0075	93.3131	303.317
25.2218	113.183	158.138	47.5322	46.3155	108.691
27.577	146.289	197.222	74.2268	108.74	143.391
118.848	123.368	134.131	28.8406	144.345	271.163
123.15	16.2559	106.599	143.045	97.709	153.811
27.3018	26.2525	10.3078	220.606	147.837	165.593
16.0023	18.0105	145.873	43.4693	137.454	175.1
98.2113	31.4454	61.6386	123.582	122.743	245.533
166.417	48.7354	191.19	98.9777	248.588	125.268
46.7858	37.8951	236.735	184.505	83.2307	114.588
33.4526	81.3367	114.197	194.917	169.825	341.496
15.8619	96.2838	215.807	63.932	118.237	92.8513
30.403	50.9475	148.784	135.69	191.351	73.1164
20.1159	58.8467	208.193	33.1436	94.5142	267.48
36.398	99.5969	126.802	52.3504	132.355	230.409
214.713	57.5398	53.6973	119.776	101.942	222.376
38.955	348.48	53.7679	105.045	67.2101	315.686
61.805	113.138	58.4875	104.951	12.3944	339.571
87.2639	147.878	75.5326	112.9	144.582	140.721
44.633	7.82945	64.7835	54.7023	183.787	55.6459
66.5213	111.834	21.551	268.787	77.3993	105.625
54.7121	93.6515	61.6479	134.998	224.779	235.335
39.4641	251.71	65.3216	99.0814	55.0577	270.649
61.399	117.925	177.181	95.8603	109.536	268.61
71.8944	170.96	64.8096	28.7923	194.637	85.8236
46.4988	58.5321	167.073	68.2489	194.254	189.206
54.3394	80.7045	78.4884	61.9175	92.3086	260.271
38.3886	49.1429	50.4162	13.5679	184.165	279.194
44.4573	68.9964	38.9088	67.1833	65.0263	129.92
79.0137	38.8532	72.9319	294.558	180.165	102.882
11.5299	43.5625	237.401	40.2831	117.742	87.1137
23.4751	97.6352	36.4285	12.5606	213.498	99.9982
58.3482	5.3356	11.6349	251.33	195.136	250.379
126.802	12.985	65.1836	36.1013	74.1923	52.6481
172.4	32.1351	236.066	14.6811	22.9415	104.757
23.8948	100.369	140.607	131.863	247.475	174.999
88.2812	82.0403	232.154	318.351	167.755	395.607
43.4621	106.649	224.246	194.083	188.384	394.56
234.414	81.9142	85.2901	157.954	116.007	143.486
44.3517	35.5069	40.1283	77.4579	101.303	392.352
69.9236	34.0017	62.5565	24.3107	98.5207	136.989
18.4805	11.2929	35	88.1493	101.694	111.291
13.0291	25.2218	34.7908	65.2845	93.0175	112.127
97.0125	27.577	13.3544	116.341	111.302	154.442
43.2437	351.012	54.9305	42.2429	36.6691	116.424
6.94045	115.456	29.129	321.636	221.713	214.119
27.3004	118.848	31.8209	368.196	174.712	59.0094
21.0791	123.15	116.814	69.9382	203.447	107.687
43.5613	27.3018	139.141	46.2761	134.015	116.486
19.7138	16.0023	131.829	34.8444	158.711	225.912
40.1323	98.2113	79.2689	138.629	90.9547	87.2806
87.0076	166.417	122.741	33.3562	12.5275	184.327
62.327	46.7858	75.3983	38.9434	206.861	133.879
103.523	33.4526	72.2743	22.0361	123.243	94.493
53.3521	15.8619	67.8522	36.0206	212.153	303.692
64.1695	30.403	171.534	58.4287	183.533	297.474
40.1024	20.1159	117.572	50.1134	62.1662	174.464
20.8462	36.398	126.084	25.9264	104.884	126.422
186.054	214.713	36.436	29.2326	233.27	150.726
29.2208	38.955	48.4938	40.3988	100.462	208.083
10.3343	61.805	134.311	61.1092	148.025	186.297
21.4946	87.2639	79.5112	91.5389	165.755	120.364
28.1101	44.633	37.8227	163.428	172.842	172.759
59.1245	66.5213	65.4441	130.747	64.661	103.451
101.823	54.7121	190.274	75.2793	35.6491	158.217
66.5979	39.4641	157.586	63.8805	191.908	232.834
74.0169	61.399	99.0409	82.7519	73.4993	24.2719
127.743	71.8944	54.5175	377.072	140.165	210.019
139.739	46.4988	81.872	141.652	232.388	265.817
61.7441	54.3394	86.0814	86.6323	112.343	344.682
136.069	38.3886	52.167	58.3724	169.07	121.907
31.1676	44.4573	110.104	75.6247	126.605	251.354
9.49939	79.0137	117.407	35.2286	134.843	317.611
26.426	11.5299	239.237	75.6527	187.171	315.969
140.497	23.4751	146.868	136.434	238.888	155.725
95.1478	327.559	85.298	164.112	198.904	213.899
60.1473	69.4796	173.3	225.731	249.307	342.978
81.6642	58.3482	87.9651	115.123	91.572	285.14
52.2144	126.802	165.16	27.1116	183.408	379.189
63.4484	172.4	165.653	83.1762	60.6632	222.494
77.4005	23.8948	63.9973	50.0708	85.784	88.9508
29.3071	88.2812	156.818	34.198	132.274	245.92
24.5113	43.4621	159.985	61.3145	197.07	184.418
42.5032	234.414	44.4435	76.6229	68.021	87.1691
37.3587	44.3517	148.899	160.485	103.451	58.6341
37.7716	9.70911	28.767	30.8642	174.636	66.3471
62.7691	250.672	153.068	98.7463	84.1588	217.594
71.2552	69.9236	103.79	31.5558	171.231	170.786
82.1186	18.4805	31.5581	278.686	160.4	305.268
114.458	13.0291	22.4909	217.236	157.434	76.6245
43.9538	97.0125	83.9094	18.0777	141.365	211.742
56.7281	43.2437	50.7949	38.2084	16.8817	174.152
30.2983	6.94045	39.402	57.741	66.1181	156.949
13.9534	27.3004	135.549	80.5338	45.4019	170.168
42.6071	21.0791	92.9958	70.1494	99.8308	201.926
7.16849	43.5613	211.047	73.705	239.512	177.214
13.6006	19.7138	88.622	95.8237	72.3488	22.4798
42.2193	40.1323	152.98	87.7915	67.7844	187.82
17.2112	87.0076	72.0498	68.7062	144.562	142.931
119.531	62.327	165.513	94.8385	75.1812	125.829
149.444	103.523	124.589	56.256	89.7416	338.236
41.9825	53.3521	79.595	144.963	91.9066	115.411
35.4617	64.1695	88.4681	236.97	145.4	151.133
19.1803	40.1024	57.6654	49.6234	114.427	272.557
24.2149	20.8462	37.5084	64.3855	129.761	38.1559
119.404	186.054	46.5336	60.0035	107.404	342.22
11.1197	29.2208	47.3051	19.1209	78.2588	124.988
116.359	10.3343	16.59	73.2701	59.1451	158.675
133.415	21.4946	19.019	51.2108	210.002	80.044
87.2713	28.1101	104.767	6.60925	108.361	312.362
15.1476	59.1245	35.7836	45.7657	137.103	322.186
77.7328	101.823	48.9363	90.7271	86.3167	176.116
49.3312	66.5979	122.744	35.2217	42.8073	86.4956
46.9898	74.0169	58.1389	31.1288	202.359	221.911
41.2954	127.743	49.8205	40.5979	140.669	188.058
15.5048	139.739	142.092	125.018	121.687	51.1537
31.4452	61.7441	88.6082	94.9012	123.543	99.4405
48.8026	136.069	37.6147	43.7865	116.939	267.546
55.6238	294.266	49.8713	370.132	71.3898	291.883
185.115	31.1676	85.9363	351.513	25.7052	382.273
84.7979	9.49939	72.1893	115.945	124.86	116.406
94.2974	26.426	65.9374	49.7762	132.093	182.688
34.6436	140.497	15.7822	46.5816	97.7822	106.178
48.976	95.1478	147.889	233.182	108.284	341.565
40.0679	60.1473	82.2561	147.455	122.283	91.9923
13.2674	81.6642	125.162	102.014	140.971	294.237
52.0692	52.2144	145.086	77.9632	133.783	334.348
42.2607	63.4484	62.8395	69.6036	149.162	388.779
71.0752	77.4005	129.971	67.4437	232.306	178.295
160.738	29.3071	9.47249	34.7131	157.641	246.257
80.6212	24.5113	106.297	16.8107	237.588	328.855
56.4565	42.5032	144.218	104.66	182.499	171.647
6.58126	37.3587	197.983	67.1037	190.044	16.0134
47.266	37.7716	153.108	38.17	53.5845	321.069
12.4622	62.7691	37.0752	103.27	62.0384	114.315
35.0525	163.779	60.3312	33.1808	175.222	172.792
108.902	71.2552	140.684	21.3596	64.8914	353.236
108.127	82.1186	26.2359	168.766	88.6061	171.446
67.1315	114.458	68.1622	99.6781	177.813	220.171
53.5288	62.5166	156.729	200.89	133.794	146.2
5.3064	43.9538	187.795	220.509	170.118	79.7579
8.21416	56.7281	100.328	118.654	215.949	140.601
77.9834	30.2983	217.763	117.943	73.3791	54.3843
75.5137	13.9534	72.6933	39.5797	117.506	111.335
102.919	42.6071	120.511	97.3444	172.009	187.664
82.0959	7.16849	77.744	145.237	145.251	150.506
59.0683	13.6006	73.8503	247.931	189.702	84.7126
71.1957	42.2193	77.0128	114.956	80.3378	375.009
10.0227	17.2112	65.5349	152.648	127.496	398.977
17.8483	119.531	142.167	105.623	181.157	236.189
67.6331	149.444	123.007	301.62	98.2642	263.142
196.568	41.9825	28.4261	77.3848	212.236	392.598
188.676	35.4617	84.6112	141.453	214.333	250.905
230.597	19.1803	53.4526	158.138	119.853	62.1729
20.3382	24.2149	108.751	197.222	181.801	91.6929
12.9671	119.404	56.0613	134.131	212.454	297.122
33.304	11.1197	130.697	106.599	174.151	353.693
38.5701	116.359	244.689	10.3078	186.905	203.632
41.0915	133.415	162.175	145.873	61.1237	249.613
12.7123	87.2713	16.4348	61.6386	141.177	114.518
30.469	15.1476	176.157	191.19	154.578	250.881
10.7478	77.7328	194.592	236.735	91.7337	379.718
60.292	49.3312	30.2762	347.095	87.3193	245.409
55.5051	46.9898	101.359	114.197	150.686	70.4173
42.8493	41.2954	182.978	215.807	240.043	135.14
137.257	15.5048	127.19	148.784	246.972	203.647
93.7457	31.4452	36.2465	208.193	204.633	118.492
109.085	48.8026	50.2609	126.802	52.3664	139.657
81.0412	55.6238	154.904	53.6973	140.131	329.584
25.0542	185.115	70.7678	53.7679	55.4842	172.687
55.201	84.7979	157.773	58.4875	71.5626	114.351
41.338	94.2974	150.859	75.5326	218.383	41.311
18.8019	34.6436	91.0452	64.7835	234.881	174.201
23.0322	48.976	165.911	21.551	62.4607	196.156
21.3687	40.0679	46.7202	61.6479	84.3462	28.038
53.5764	13.2674	22.8749	65.3216	239.654	264.15
95.7878	52.0692	116.009	177.181	74.4616	193.246
101.699	42.2607	139.391	64.8096	123.829	256.706
195.32	71.0752	246.245	167.073	41.2505	32.3616
72.607	160.738	52.9035	78.4884	112.193	366.959
125.247	80.6212	142.216	50.4162	117.735	144.841
89.3991	56.4565	156.424	38.9088	57.0362	320.202
119.328	6.58126	36.2248	72.9319	163.614	262.18
63.8933	47.266	162.947	237.401	128.778	241.786
65.4301	12.4622	69.1673	395.124	139.956	192.821
152.932	35.0525	137.842	36.4285	178.731	132.326
130.815	108.902	103.036	11.6349	156.92	36.246
60.1836	108.127	236.848	65.1836	80.8574	269.441
77.3611	67.1315	214.757	236.066	89.0399	306.623
121.21	53.5288	29.1114	140.607	159.594	198.475
75.293	5.3064	37.5096	232.154	146.497	213.992
70.4716	8.21416	115.478	224.246	207.623	116.988
70.5925	77.9834	186.394	85.2901	132.438	227.09
76.1096	75.5137	205.536	40.1283	170.161	43.6128
44.584	102.919	52.2524	62.5565	156.071	107.078
84.9914	82.0959	64.458	35	148.466	202.072
227.418	59.0683	51.5677	34.7908	187.511	303.177
50.452	71.1957	53.7283	13.3544	192.169	301.157
72.2965	10.0227	115.969	54.9305	83.8384	134.468
125.175	17.8483	78.4312	29.129	192.317	84.466
49.4354	67.6331	125.239	31.8209	163.694	160.082
72.3666	196.568	38.2503	116.814	194.232	247.593
85.4229	188.676	3.85263	139.141	86.1801	101.789
61.353	230.597	54.761	131.829	30.1109	158.195
46.015	20.3382	48.4464	113.394	189.15	216.733
9.61056	12.9671	90.922	315.594	113.265	133.175
77.3465	33.304	25.9625	79.2689	66.4011	229.654
183.826	38.5701	93.4001	122.741	169.708	89.2623
157.591	41.0915	220.367	75.3983	204.485	49.5054
8.43206	12.7123	69.3404	72.2743	75.7375	359.872
23.9253	30.469	119.884	57.828	134.971	230.108
16.6734	10.7478	65.1876	289.046	84.0153	253.865
34.7905	60.292	88.154	67.8522	180.087	129.066
30.2358	55.5051	112.205	171.534	62.2688	68.1311
35.4942	42.8493	82.9046	117.572	132.55	156.885
59.183	137.257	96.3849	126.084	108.698	397.037
46.9365	93.7457	38.5737	36.436	103.634	161.816
96.6482	109.085	59.9697	48.4938	75.7052	289.401
38.8182	81.0412	94.3007	134.311	27.3497	294.898
42.5868	25.0542	35.1082	79.5112	216.44	208.665
46.3343	55.201	151.062	37.8227	182.539	224.884
6.10163	41.338	117.76	65.4441	89.5513	117.678
3.94059	18.8019	80.3178	190.274	85.8648	163.917
58.2902	23.0322	64.0965	157.586	143.394	369.496
50.316	21.3687	117.62	99.0409	31.9125	200.256
39.2364	53.5764	143.812	54.5175	147.429	224.41
36.1022	95.7878	168.564	81.872	91.7798	290.84
90.0558	89.3991	74.2606	86.0814	83.0552	280.209
18.6915	101.699	58.2883	52.167	191.617	213.312
43.7248	195.32	39.0277	110.104	94.0941	60.3714
58.0235	72.607	154.987	117.407	17.6509	320.367
69.3713	125.247	44.2685	239.237	130.449	292.009
48.9099	119.328	215.111	342.8	69.7173	182.807
32.3398	63.8933	92.13	187.277	30.0573	161.498
125.195	65.4301	67.2831	146.868	172.68	101.765
36.902	152.932	156.732	316.728	117.064	292.395
49.8622	130.815	83.6178	85.298	152.465	82.3289
9.31041	60.1836	12.2442	306.641	188.74	102.479
23.2504	77.3611	22.3506	259.149	15.6943	333.143
33.6875	121.21	247.465	173.3	126.544	348.5
29.4204	75.293	51.7682	87.9651	117.378	378.649
33.9012	70.4716	36.5638	264.343	91.7366	179.995
51.9436	70.5925	210.765	132.805	213.495	78.8781
8.33443	76.1096	220.715	165.16	104.536	95.8977
30.3863	44.584	16.9667	165.653	238.913	154.018
28.5766	84.9914	60.763	63.9973	200.236	61.9287
42.2388	227.418	48.0176	156.818	50.842	147.144
42.7518	50.452	95.6693	159.985	69.3293	195.866
27.4826	72.2965	211.87	44.4435	135.83	316.374
14.2172	125.175	159.226	148.899	157.157	348.001
144.912	49.4354	39.7238	28.767	20.2227	356.167
24.9826	72.3666	68.6825	372.59	126.071	218.175
69.9606	85.4229	224.758	70.9163	37.7684	258.82
52.0369	61.353	132.134	153.068	213.042	93.4319
9.49939	46.015	71.3742	391.893	98.6705	227.363
76.1726	9.61056	36.8144	50.7949	52.401	215.581
87.8762	77.3465	109.997	39.402	158.455	354.834
87.1775	183.826	97.9854	135.549	218.841	72.9451
37.6918	157.591	205.16	103.79	215.189	149.809
10.7232	8.43206	94.0259	31.5581	71.1721	202.898
36.6695	23.9253	222.157	22.4909	135.221	313.136
59.8011	16.6734	157.227	83.9094	111.37	105.747
55.3697	34.7905	115.221	92.9958	160.3	61.1158
24.4986	30.2358	96.2218	211.047	74.1907	289.697
13.2041	35.4942	91.2398	88.622	128.133	123.234
42.866	59.183	209.543	283.773	34.1621	172.187
96.9633	394.997	182.882	244.696	156.996	150.006
11.8075	53.5747	165.117	152.98	213.332	61.9239
43.3415	46.9365	186.275	72.0498	102.108	328.675
213.093	96.6482	74.9945	165.513	239.766	216.937
33.8355	38.8182	18.7823	124.589	208.818	130.139
64.7328	42.5868	82.6409	253.958	218.751	101.048
230.087	46.3343	64.3817	79.595	87.4197	220.329
11.5587	6.10163	69.0333	167.52	76.049	70.9887
36.0473	3.94059	178.797	280.941	25.9779	151.527
81.3647	58.2902	181.543	213.177	79.019	152.405
41.9778	50.316	128.604	312.069	20.843	107.325
178.519	39.2364	116.648	165.16	84.5778	288.001
156.068	36.1022	89.3545	88.4681	141.89	123.56
97.4807	90.0558	149.068	57.6654	205.311	106.495
20.1191	18.6915	33.2801	37.5084	180.236	132.175
24.2459	43.7248	63.4589	46.5336	94.2627	85.9045
37.0424	58.0235	161.03	47.3051	202.464	205.049
16.4757	69.3713	115.711	16.59	222.323	143.402
26.3591	48.9099	140.796	19.019	85.54	93.5536
28.7302	32.3398	155.555	348.455	153.336	101.295
33.3138	125.195	155.778	104.767	129.377	129.328
15.7944	36.902	93.5997	35.7836	30.4491	140.191
3.84013	49.8622	45.1976	48.9363	200.597	214.772
45.4954	9.31041	111.655	122.744	35.9848	286.344
37.5327	23.2504	21.2684	99.6484	24.8137	70.06
61.923	33.6875	99.8191	58.1389	215.671	135.589
48.1292	29.4204	65.6121	49.8205	96.7833	374.148
14.0246	33.9012	59.206	142.092	164.595	45.9593
37.5558	51.9436	163.411	88.6082	172.265	60.2364
39.0756	8.33443	107.721	329.448	156.72	281.426
103.785	30.3863	85.7959	37.6147	40.9589	202.676
116.028	28.5766	169.627	49.8713	214.433	196.013
72.0801	42.2388	81.6274	85.9363	100.737	248.169
25.4179	42.7518	229.087	72.1893	66.0928	141.18
54.3914	27.4826	109.906	65.9374	161.634	135.983
35.7699	14.2172	82.0937	15.7822	193.117	280.153
26.6091	144.912	140.013	147.889	189.024	336.422
34.8383	24.9826	127.893	82.2561	96.0051	47.6658
26.8002	69.9606	39.8963	125.162	53.4204	243.995
26.3634	52.0369	55.6809	308.844	121.391	366.09
62.7555	9.49939	91.3454	126.72	172.007	172.806
19.309	76.1726	68.9127	145.086	140.946	97.9703
32.5189	87.8762	170.003	62.8395	53.8206	166.863
65.068	87.1775	228.478	129.971	190.738	75.9256
62.3299	37.6918	140.71	9.47249	139.457	132.024
234.918	10.7232	156.151	37.391	137.256	169.005
50.5598	36.6695	106.725	297.771	173.874	162.015
113.527	59.8011	35.2981	221.624	153.097	178.313
76.3745	55.3697	44.6916	106.297	232.976	122.333
53.6198	24.4986	31.6454	197.983	62.511	390.753
63.3612	13.2041	48.3112	144.218	81.2788	315.826
58.7383	42.866	68.709	270.699	122.932	159.872
22.8367	96.9633	56.9197	162.861	134.026	206.849
134.812	11.8075	156.364	167.309	73.7536	169.172
23.3114	43.3415	173.953	153.108	167.162	272.403
32.2301	213.093	172.498	152.157	45.4715	213.744
45.4418	33.8355	74.9972	333.779	65.5384	131.925
93.0633	64.7328	84.718	37.0752	172.486	296.292
31.0901	230.087	226.385	60.3312	60.9932	121.003
27.4424	11.5587	106.307	140.684	106.416	40.3877
43.1351	36.0473	40.5643	26.2359	224.078	325.512
46.0179	81.3647	37.6069	68.1622	32.4432	203.547
36.2519	41.9778	46.1338	156.729	45.45	33.2672
57.7756	178.519	84.8366	187.795	160.858	254.661
17.6764	156.068	113.066	67.8856	108.691	148.93
68.5249	97.4807	102.274	331.855	150.037	263.369
13.7299	20.1191	53.6988	100.328	83.6165	379.932
25.8822	24.2459	103.036	217.763	45.7684	240.982
7.51012	37.0424	7.96648	268.985	161.885	51.9828
9.26974	16.4757	109.71	72.6933	17.3693	282.35
61.1326	26.3591	139.955	120.511	90.2184	332.854
74.6129	28.7302	249.096	368.072	89.5987	240.682
31.6775	33.3138	17.78	65.5349	190.757	52.3149
77.8516	15.7944	219.545	142.167	72.6095	95.7532
129.822	3.84013	68.3177	280.532	131.681	110.909
113.02	45.4954	35.7471	56.0613	140.64	294.114
15.8149	37.5327	35.4521	130.697	107.78	350.314
25.752	61.923	106.63	244.689	83.6922	222.793
106.613	48.1292	77.2608	353.471	94.4972	168.074
51.908	14.0246	204.655	83.8034	55.2588	351.052
30.5364	37.5558	50.5048	77.744	90.9609	126.111
85.5156	39.0756	138.366	73.8503	77.8783	137.139
74.2053	103.785	84.3305	77.0128	44.0508	310.637
64.9649	116.028	41.0787	123.007	41.78	362.231
31.4487	72.0801	197.689	28.4261	114.944	164.902
25.1593	25.4179	235.605	84.6112	74.8514	223.802
16.9329	54.3914	89.8774	53.4526	87.0229	211.112
19.2708	35.7699	38.3857	108.751	149.454	146.987
25.5814	26.6091	71.2632	162.175	173.641	202.32
44.4139	34.8383	33.1447	16.4348	173.673	58.6192
46.6512	26.8002	80.7942	252.79	155.229	52.1024
38.4195	26.3634	40.8032	73.7168	82.2848	94.4449
3.73686	62.7555	158.109	176.157	206.079	51.4636
85.4935	365.105	243.578	194.592	204.994	238.429
72.2959	323.289	154.718	294.634	106.869	145.895
57.3178	19.309	180.586	30.2762	106.99	321.105
31.1597	32.5189	102.586	101.359	53.3394	82.4458
22.3895	65.068	242.39	182.978	113.256	74.28
42.1757	62.3299	211.973	127.19	183.433	146.758
17.3625	234.918	43.1162	36.2465	122.978	313.976
32.155	50.5598	26.9024	50.2609	62.4665	94.9859
71.3504	113.527	26.9656	154.904	219.05	27.5409
78.1186	76.3745	24.0132	70.7678	141.357	46.245
20.9197	53.6198	171.4	157.773	169.39	310.57
80.9956	63.3612	142.817	150.859	194.188	168.158
110.485	371.887	98.3412	351.605	182.523	351.915
2.49051	58.7383	89.1552	214.431	28.7575	370.315
58.8917	22.8367	142.075	91.0452	163.444	109.011
49.3745	134.812	111.765	165.911	30.8443	367.451
35.6003	23.3114	93.3572	46.7202	177.173	121.731
95.2827	32.2301	68.7344	22.8749	105.641	70.9233
73.465	45.4418	52.8769	116.009	164.02	94.6877
59.8537	93.0633	132.24	139.391	114.045	54.291
104.899	31.0901	107.981	277.197	192.246	380.152
174.618	27.4424	55.2608	246.245	41.398	107.672
208.16	43.1351	48.1372	52.9035	123.887	212.611
75.3547	46.0179	51.4561	142.216	32.656	290.854
32.4047	36.2519	85.152	156.424	243.494	268.481
67.6491	57.7756	53.2684	36.2248	218.283	68.7508
76.1903	17.6764	36.45	162.947	159.668	60.9615
163.983	68.5249	56.0762	266.618	135.235	148.453
28.5466	13.7299	107.165	69.1673	40.8495	32.9038
43.8382	25.8822	61.1722	160.143	38.3261	30.2313
196.119	7.51012	238.847	81.6281	58.2513	51.6008
249.186	9.26974	136.36	137.842	82.6663	32.888
22.4006	61.1326	73.3395	103.036	31.356	85.2182
58.0713	74.6129	162.674	236.848	177.487	71.3158
36.1892	31.6775	140.509	198.649	166.891	306.796
11.9639	77.8516	37.6237	214.757	193.817	135.087
85.8419	129.822	73.212	29.1114	215.952	95.9488
45.2217	113.02	37.5153	37.5096	95.7984	55.2286
58.0061	15.8149	112.032	115.478	82.6882	59.9785
16.8228	25.752	175.63	186.394	153.267	138.844
10.9669	106.613	178.675	205.536	39.8405	52.6469
6.82266	51.908	83.6246	52.2524	121.963	35.2772
65.0613	30.5364	41.5932	64.458	136.086	113.292
113.898	85.5156	67.3903	51.5677	28.7501	297.409
66.9541	74.2053	25.9563	53.7283	115.743	146.9
123.571	64.9649	95.1105	115.969	161.218	36.4516
209.142	31.4487	143.961	78.4312	200.642	172.427
114.869	25.1593	220.146	125.239	235.029	83.468
66.1112	16.9329	139.176	38.2503	96.0225	115.9
18.2824	19.2708	23.6206	3.85263	150.218	141.202
53.9585	25.5814	50.2926	54.761	176.444	136.171
100.102	44.4139	143.334	48.4464	22.9242	263.998
147.544	46.6512	147.399	90.922	51.4802	203.907
117.202	38.4195	48.0014	25.9625	50.0584	169.336
51.6318	3.73686	27.7839	93.4001	126.042	196.075
65.5667	85.4935	6.90232	100.397	249.066	327.662
11.9306	72.2959	116.241	217.083	237.915	144.326
59.8173	57.3178	142.747	220.367	97.3727	317.144
53.6129	31.1597	99.721	69.3404	69.9042	31.0548
16.2797	22.3895	62.092	222.304	9.79246	36.245
33.0587	42.1757	78.4113	283.617	20.968	151.871
20.2115	17.3625	84.0557	26.1887	137.759	243.433
51.1248	32.155	51.1278	119.884	147.511	370.661
59.4679	71.3504	152.546	65.1876	105.793	326.655
23.771	78.1186	242.204	88.154	110.423	359.299
56.8647	20.9197	125.987	220.634	67.2909	104.775
82.2101	80.9956	120.91	104.434	180.408	82.3743
159.415	110.485	210.082	112.205	193.596	78.2558
15.4949	2.49051	96.3434	252.624	214.848	384.047
4.13885	58.8917	138.321	210.768	3.90868	323.634
13.3786	49.3745	42.9064	250.642	72.5004	62.4601
65.2637	35.6003	8.44249	341.229	170.232	147.349
107.973	95.2827	76.6681	82.9046	123.03	145.636
73.5555	73.465	73.8357	96.3849	79.8414	158.144
25.572	59.8537	58.7244	38.5737	210.453	284.852
29.1822	104.899	240.172	59.9697	105.851	218.79
73.7214	174.618	45.8743	94.3007	158.754	143.852
10.8131	208.16	128.697	35.1082	134.224	191.637
53.558	76.1903	125.419	151.062	172.19	64.8031
51.7064	163.983	83.2143	117.76	247.485	180.124
24.6507	75.3547	75.7772	80.3178	118.403	84.2316
20.067	32.4047	101.298	168.564	103.6	102.21
37.1253	67.6491	59.9443	64.0965	157.402	121.883
23.531	28.5466	105.284	117.62	223.08	113.998
49.1586	43.8382	160.843	143.812	93.7384	394.706
42.4215	196.119	110.039	74.2606	220.78	189.165
36.5585	249.186	155.133	58.2883	20.6652	173.35
72.1232	268.801	56.2382	116.829	200.566	33.2249
31.9752	17.1814	89.3458	390.377	63.9973	179.198
3.91352	22.4006	59.8316	39.0277	55.0995	269.567
48.2978	58.0713	160.677	154.987	165.788	59.0834
48.3744	36.1892	111.024	44.2685	76.2743	89.005
75.1446	11.9639	58.2676	215.111	56.6496	75.4335
38.6864	85.8419	20.8913	92.13	76.798	137.259
66.4097	45.2217	74.6169	67.2831	115.055	273.371
76.8086	58.0061	151.917	156.732	63.9933	154.167
57.6647	17.5232	177.22	83.6178	34.1884	130.333
97.5049	16.8228	218.205	12.2442	67.7682	286.531
77.6355	10.9669	125.796	22.3506	49.0616	76.1237
28.5026	6.82266	167.036	289.099	189.147	91.0011
37.72	65.0613	17.4772	36.5638	120.625	193.613
27.5462	113.898	63.1092	210.765	225.287	88.3646
6.60142	82.7887	81.8733	247.465	47.2078	59.5874
89.4564	284.844	16.5534	51.7682	220.95	66.0839
11.1131	67.2209	88.0844	295.837	148.519	94.7376
101.479	66.9541	83.0408	344.847	95.3138	275.545
66.9808	123.571	137.732	220.715	100.414	297.126
46.7181	54.3449	207.44	16.9667	88.5413	139.347
132.089	114.869	99.8585	60.763	174.81	179.069
20.2402	66.1112	24.1781	275.045	213.954	194.054
79.3191	18.2824	58.082	249.011	25.6205	106.484
27.5377	53.9585	164.198	48.0176	87.6527	104.102
24.9501	100.102	16.0567	292.304	202.014	116.21
18.2812	209.142	79.274	95.6693	109.903	116.817
39.1476	54.931	27.052	211.87	95.3258	39.5384
55.9445	147.544	109.415	159.226	108.628	93.1208
6.98642	117.202	172.77	39.7238	205.076	46.9659
56.488	1.89734	20.3085	68.6825	230.28	72.8302
38.7906	294.97	99.2688	224.758	201.751	55.3401
46.7425	51.6318	111.018	132.134	78.6444	259.17
62.2554	65.5667	224.206	71.3742	102.455	80.2079
26.7109	11.9306	49.559	36.8144	180.96	88.4944
66.7102	59.8173	81.6727	109.997	187.333	291.415
23.4915	53.6129	181.782	97.9854	230.03	12.308
56.1832	16.2797	60.7186	152.762	143.62	143.208
100.107	33.0587	47.8723	312.13	105.434	82.219
74.7689	20.2115	60.7766	205.16	36.1653	213.713
34.5449	51.1248	232.846	94.0259	26.8262	63.827
12.5312	59.4679	119.346	222.157	183.884	25.2796
14.0713	23.771	244.215	214.208	215.618	65.1254
7.63327	56.8647	50.7775	157.227	120.73	99.2432
51.784	82.2101	100.574	115.221	123.725	179.946
53.8639	159.415	86.2927	96.2218	173.507	51.2355
62.2527	15.4949	45.0361	220.694	95.3863	81.7104
51.9465	4.13885	91.6556	297.971	167.263	216.274
73.0082	13.3786	181.485	129.875	100.856	203.385
76.432	65.2637	107.604	91.2398	18.4778	370.337
42.8049	107.973	55.8298	209.543	206.32	216.472
14.8122	73.5555	157.305	182.882	51.0061	198.053
37.06	25.572	109.201	262.908	46.4331	133.056
29.7954	29.1822	34.7004	221.254	231.517	148.859
47.111	73.7214	159.677	165.117	100.258	394.776
13.9588	10.8131	36.8874	186.275	155.536	364.103
9.22677	53.558	99.3659	282.194	73.0226	88.3598
70.4364	51.7064	78.1282	74.9945	22.3436	166.632
127.407	24.6507	147.326	18.7823	123.455	62.3821
115.777	20.067	156.452	271.163	215.143	348.404
46.1831	37.1253	141.266	85.632	88.0633	332.872
51.1426	23.531	66.6718	253.364	186.005	173.524
24.1919	49.1586	137.535	84.0811	125.252	314.171
77.3817	42.4215	218.455	82.6409	193.582	377.486
30.72	36.5585	130.442	64.3817	110.383	23.6376
63.1127	72.1232	183.065	69.0333	128.387	206.899
41.0098	31.9752	139.365	178.797	196.056	141.421
162.127	3.91352	106.189	181.543	172.89	310.326
49.5372	256.384	95.9008	128.604	151.719	273.122
36.2188	48.2978	32.4377	116.648	74.5652	330.058
87.8714	48.3744	58.3835	89.3545	74.4931	80.7468
10.02	75.1446	40.6937	149.068	65.5631	110.857
43.4118	38.6864	79.6837	33.2801	82.943	166.385
58.2411	66.4097	75.0105	63.4589	128.822	203.025
39.8691	76.8086	108.275	161.03	18.5333	102.001
109.961	57.6647	66.723	115.711	172.847	386.926
123.92	97.5049	66.8199	140.796	164.449	51.7068
106.057	77.6355	69.1154	155.555	91.0215	184.365
30.5995	28.5026	74.7744	155.778	74.2117	181.599
41.0255	37.72	93.2439	93.5997	161.746	107.865
20.5186	27.5462	219.501	45.1976	229.288	297.593
19.0271	6.60142	47.2906	111.655	66.9293	246.033
20.4846	89.4564	53.849	21.2684	173.794	113.044
47.4858	11.1131	60.3748	99.8191	37.8044	275.533
30.2916	101.479	61.6621	65.6121	212.216	173.411
70.537	66.9808	8.74011	59.206	236.215	256.261
63.1045	46.7181	148.328	200.987	122.747	22.3663
29.1841	132.089	127.168	163.411	180.579	138.082
29.3404	20.2402	85.4822	107.721	188.479	30.5071
36.5386	79.3191	31.6063	85.7959	66.4915	301.91
52.5721	27.5377	218.95	150.775	70.7932	67.5516
39.9592	24.9501	25.3803	259.833	231.945	42.4271
44.0715	18.2812	65.1886	171.605	128.985	133.208
33.054	39.1476	78.7782	169.627	248.232	260.816
35.269	55.9445	12.1069	81.6274	84.6478	87.7606
64.9162	6.98642	176.187	229.087	203.069	164.356
43.8158	56.488	206.057	297.239	150.471	139.151
93.7403	38.7906	103.107	109.906	22.6044	144.891
31.0795	46.7425	168.833	316.375	231.833	313.531
50.3719	62.2554	82.6772	82.0937	163.87	221.768
53.8231	26.7109	115.47	140.013	143.48	299.463
46.2485	66.7102	44.6262	127.893	237.659	63.4194
35.244	23.4915	109.806	180.584	143.915	209.776
129.69	56.1832	17.441	328.474	237.048	220.841
116.564	100.107	32.1895	39.8963	89.12	81.459
63.1117	74.7689	60.8827	55.6809	84.4763	300.317
67.6347	34.5449	109.835	91.3454	244.879	243.698
35.9415	12.5312	77.0018	271.942	44.1377	243.074
61.521	14.0713	33.299	341.52	65.7013	45.2453
32.2575	7.63327	125.678	68.9127	57.0489	342.937
43.8537	51.784	243.482	170.003	166.284	144.221
140.333	53.8639	60.7781	228.478	167.791	182.364
23.2236	62.2527	168.89	268.476	176.182	149.007
47.965	51.9465	162.687	140.71	114.248	196.138
79.8026	258.084	48.2502	156.151	236.235	106.257
28.7168	73.0082	21.4	106.725	30.8821	61.6997
37.5717	76.432	9.28495	35.2981	236.694	189.47
54.4265	42.8049	51.8498	44.6916	139.1	108.113
51.401	14.8122	224.921	31.6454	247.233	277.437
36.1004	37.06	170.418	48.3112	31.4529	94.6773
20.3144	29.7954	94.1615	68.709	194.399	214.609
138.594	47.111	82.1967	56.9197	109.475	137.924
42.5514	261.679	239.209	156.364	124.569	272.259
38.1809	258.153	30.1213	87.59	84.0846	156.305
32.0806	13.9588	220.15	369.595	151.495	127.539
58.6017	9.22677	235.4	370.772	168.657	145.734
51.1246	70.4364	17.9671	173.953	204.145	373.677
108.194	291.472	80.5137	172.498	79.7531	258.152
106.6	230.376	64.3904	74.9972	169.382	205.414
16.8164	127.407	82.5987	84.718	123.214	77.1542
94.3805	115.777	11.3162	339.194	105.56	166.291
89.2111	46.1831	159.017	263.442	11.7844	138.242
62.5334	51.1426	17.8144	261.842	101.386	286.857
24.047	24.1919	104.125	277.241	130.033	307.882
2.82707	77.3817	79.6906	378.138	174.42	80.7195
31.0942	30.72	41.2769	226.385	68.1469	235.023
24.3673	63.1127	106.759	106.307	223.357	242.969
52.9999	41.0098	49.4392	40.5643	103.27	277.203
39.1194	162.127	192.8	37.6069	236.533	250.943
222.424	49.5372	56.0616	46.1338	65.5741	106.624
44.916	36.2188	237.846	84.8366	151.393	107.15
42.476	87.8714	152.932	113.066	170.92	298.529
58.1316	10.02	84.7237	102.274	80.7252	297.868
19.6726	43.4118	108.171	53.6988	110.871	145.306
88.9305	58.2411	29.2431	103.036	64.7921	93.3131
75.8383	39.8691	135.864	7.96648	105.331	46.3155
34.8434	109.961	77.6727	109.71	54.6397	108.74
35.045	123.92	8.69898	139.955	153.479	351.83
61.3488	106.057	83.007	249.096	182.921	379.326
69.4593	30.5995	122.087	17.78	140.2	85.3244
76.3944	191.269	69.0903	219.545	75.9005	144.345
47.327	41.0255	61.7216	68.3177	132.738	97.709
49.2395	20.5186	71.2727	35.7471	74.708	147.837
80.7221	19.0271	39.6071	35.4521	49.2432	137.454
84.1129	19.4428	202.07	106.63	130.516	88.4082
53.5175	20.4846	86.028	77.2608	169.435	255.018
48.1983	47.4858	80.364	343.39	206.072	210.761
21.4841	30.2916	118.072	204.655	106.79	122.743
53.9808	70.537	92.5592	50.5048	86.6956	248.588
31.2618	63.1045	146.033	138.366	179.944	83.2307
15.0877	29.1841	96.741	84.3305	33.355	169.825
30.5144	29.3404	58.0681	41.0787	218.876	118.237
35.9163	36.5386	149.354	197.689	229.212	191.351
58.6583	52.5721	194.019	235.605	73.2667	94.5142
3.38705	39.9592	243.645	305.616	176.677	132.355
30.2877	44.0715	222.92	89.8774	154.532	101.942
84.7206	33.054	31.2892	38.3857	98.9623	67.2101
120.51	35.269	83.8377	71.2632	217.374	12.3944
72.6175	64.9162	73.729	33.1447	130.977	144.582
213.128	43.8158	93.6847	80.7942	161.527	242.051
32.0175	93.7403	183.203	40.8032	5.11845	314.077
55.5514	31.0795	90.2868	158.109	129.401	99.9056
71.9813	50.3719	93.7219	243.578	170.894	79.7629
30.0938	53.8231	85.2528	154.718	162.69	183.787
228.141	46.2485	235.067	180.586	98.9085	77.3993
137.046	35.244	147.303	102.586	100.859	224.779
32.3126	129.69	219.563	309.398	53.8097	55.0577
17.5231	116.564	184.617	43.1162	96.8387	150.81
46.4638	63.1117	61.7492	26.9024	214.937	299.419
86.1606	67.6347	82.9085	242.39	101.744	82.8295
42.6435	35.9415	157.776	211.973	162.157	282.359
45.0837	61.521	163.858	26.9656	163.805	109.536
52.5688	32.2575	195.944	24.0132	112.963	384.978
192.241	43.8537	133.293	171.4	80.804	194.637
16.3995	140.333	157.177	142.817	91.3551	194.254
76.6272	23.2236	164.449	98.3412	50.017	298.699
163.063	47.965	130.159	89.1552	87.9101	152.916
131.352	79.8026	113.714	142.075	166.263	260.307
87.8982	28.7168	213.681	72.3895	89.6736	92.3086
55.0234	37.5717	175.742	254.262	105.273	184.165
53.8242	54.4265	151.518	206.749	147.579	65.0263
39.4057	51.401	57.9094	355.173	243.88	180.165
95.6886	36.1004	25.6431	361.492	198.127	353.223
32.8823	20.3144	39.6426	234.588	127.615	158.52
44.2862	138.594	109.701	111.765	107.879	329.323
8.43863	42.5514	62.7625	93.3572	178.314	108.477
24.1678	38.1809	42.9339	68.7344	130.534	258.559
40.8182	32.0806	28.7422	52.8769	103.839	288.78
57.1326	58.6017	122.748	339.121	136.715	117.742
83.9901	51.1246	44.4381	309.328	127.874	213.498
62.3014	108.194	101.329	132.24	55.348	95.5494
130.644	106.6	121.064	107.981	221.252	286.066
35.6875	16.8164	100.215	81.9623	74.7006	195.136
72.9166	94.3805	169.192	33.7224	11.0515	74.1923
71.962	89.2111	52.4984	55.2608	229.105	22.9415
20.091	283.727	37.1164	48.1372	129.786	286.345
246.242	65.1262	66.03	51.4561	114.538	247.475
51.3128	62.5334	233.227	47.1842	126.294	167.755
126.984	24.047	221.568	85.152	163.834	126.396
164.97	2.82707	115.632	53.2684	128.799	354.453
195.73	31.0942	24.6832	36.45	237.394	235.188
197.921	24.3673	77.1807	56.0762	180.402	188.384
53.9664	52.9999	80.0001	107.165	98.4661	116.007
6.89288	39.1194	25.8036	61.1722	58.6744	101.303
36.7196	222.424	121.838	238.847	188.107	98.5207
52.2407	44.916	91.668	136.36	29.9117	101.694
17.8519	42.476	45.4583	128.847	172.237	284.151
60.2028	58.1316	47.2548	73.3395	137.418	93.0175
58.8089	19.6726	139.947	162.674	23.8138	111.302
56.3244	88.9305	68.8881	140.509	39.638	68.52
93.2208	75.8383	115.65	37.6237	51.3196	324.141
44.6776	34.8434	115.248	73.212	126.327	278.348
51.6257	35.045	137.287	37.5153	191.89	36.6691
38.2254	61.3488	219.867	112.032	25.2704	221.713
19.5418	69.4593	105.209	322.531	198.293	174.712
44.8402	76.3944	118.017	226.155	222.432	203.447
69.1542	47.327	236.406	61.7193	152.693	134.015
67.8007	49.2395	70.0202	382.286	110.904	158.711
5.2469	80.7221	161.961	104.255	170.145	90.9547
105.884	84.1129	45.9025	175.63	206.69	12.5275
54.6164	53.5175	173.893	178.675	215.704	206.861
65.4634	265.027	62.8988	83.6246	21.6874	123.243
119.01	53.9808	54.7141	41.5932	186.375	371.129
80.2564	31.2618	134.455	67.3903	201.414	371.637
81.6055	15.0877	90.9171	25.9563	108.333	212.153
47.6402	30.5144	237.203	95.1105	204.497	183.533
29.2549	35.9163	64.329	143.961	141.87	62.1662
32.0049	48.1983	123.245	220.146	210.656	327.748
5.6126	21.4841	146.404	139.176	183.296	358.298
24.6925	58.6583	120.359	23.6206	180.623	205.877
50.6673	3.38705	23.5966	50.2926	175.621	325.756
16.0729	30.2877	119.491	143.334	160.025	104.884
33.8346	84.7206	221.409	368.5	174.349	233.27
17.1545	120.51	28.8422	254.468	84.5561	100.462
17.538	72.6175	183.558	254.2	181.518	148.025
58.6367	213.128	160.228	369.603	212.717	165.755
6.23399	32.0175	67.9662	84.1219	37.7362	172.842
42.5811	55.5514	46.9793	336.006	4.59222	64.661
132.229	71.9813	42.7948	138.803	91.8317	35.6491
23.3774	30.0938	94.2106	147.399	25.0903	191.908
18.5691	228.141	29.3343	48.0014	84.1358	73.4993
18.6097	137.046	79.6424	27.7839	157.288	145.151
178.208	32.3126	77.9755	6.90232	102.057	295.831
199.651	17.5231	66.7012	116.241	245.685	358.653
137.122	46.4638	124.134	142.747	234.414	122.54
23.7931	86.1606	84.5081	99.721	203.189	358.773
30.7735	42.6435	23.886	62.092	115.912	140.165
120.528	45.0837	77.7788	78.4113	204.276	232.388
65.68	52.5688	186.902	84.0557	156.058	112.343
144.806	192.241	74.7384	74.8991	90.9727	308.409
100.302	16.3995	69.2891	51.1278	201.772	169.07
157.472	76.6272	46.2498	152.546	148.45	126.605
120.731	163.063	84.7665	242.204	205.051	134.843
225.017	131.352	7.56904	125.987	184.513	187.171
39.4044	87.8982	46.9423	120.91	126.623	238.888
95.9649	55.0234	72.2021	191.358	40.8248	146.052
89.4726	53.8242	237.401	279.329	157.508	267.456
28.4071	30.4567	95.4943	210.082	38.7537	198.904
23.5028	39.4057	231.919	96.3434	95.9447	249.307
22.0436	95.6886	204.399	138.321	151.427	91.572
39.0992	32.8823	119.783	42.9064	71.4294	183.408
48.2191	44.2862	61.2332	8.44249	88.4903	60.6632
73.7179	8.43863	53.1505	76.6681	214.859	85.784
108.102	24.1678	46.2822	73.8357	141.436	268.663
72.3139	40.8182	44.8146	58.7244	171.23	309.962
73.7253	57.1326	56.7577	240.172	119.362	385.439
60.351	83.9901	108.738	45.8743	161.793	132.274
42.0965	62.3014	12.3694	275.724	151.105	197.07
106.633	287.848	134.493	265.104	223.001	68.021
107.855	130.644	115.612	128.697	62.489	103.451
40.2921	35.6875	72.8597	125.419	194.343	83.1435
56.4616	72.9166	24.211	83.2143	221.473	174.636
52.7486	71.962	120.525	75.7772	114.089	84.1588
23.1792	20.091	107.357	101.298	75.2841	309.155
25.6519	246.242	60.7283	59.9443	246.716	240.414
102.864	51.3128	187.74	105.284	199.523	197.368
54.3578	126.984	247.859	160.843	214.255	357.866
30.5203	164.97	111.474	110.039	48.004	171.231
35.7895	195.73	59.7028	155.133	57.1645	160.4
114.346	197.921	95.3668	56.2382	140.817	157.434
178.96	53.9664	97.752	89.3458	186.161	141.365
99.7327	6.89288	67.1402	59.8316	149.248	16.8817
80.1435	36.7196	78.7852	160.677	188.643	66.1181
78.492	52.2407	60.1105	111.024	205.632	45.4019
54.5952	17.8519	71.1194	58.2676	177.796	99.8308
108.089	60.2028	27.9181	20.8913	141.546	261.116
38.5397	58.8089	127.182	74.6169	16.6303	132.21
70.2165	56.3244	240.854	151.917	214.239	239.512
12.2609	93.2208	157.661	161.349	101.058	343.799
24.4287	44.6776	88.2895	177.22	244.685	241.663
33.8117	51.6257	173.087	218.205	189.527	236.24
20.0725	38.2254	55.4716	125.796	130.115	72.3488
36.25	19.5418	45.0582	167.036	82.2443	67.7844
73.2976	44.8402	118.774	256.171	210.622	144.562
37.0152	69.1542	57.4005	17.4772	199.572	75.1812
83.8802	67.8007	70.5045	63.1092	99.4989	89.7416
51.4535	5.2469	116.299	81.8733	239.149	91.9066
45.8167	105.884	181.621	16.5534	172.292	145.4
36.6156	54.6164	47.9534	88.0844	115.622	114.427
94.6035	65.4634	139.091	83.0408	208.704	129.761
56.4181	40.929	70.6521	137.732	76.3102	107.404
118.703	119.01	173.248	278.821	85.4422	78.2588
82.3012	80.2564	21.1197	164.361	249.768	59.1451
53.479	81.6055	92.8165	207.44	151.666	210.002
95.942	47.6402	76.2062	99.8585	125.129	108.361
89.8989	29.2549	52.3952	59.2982	218.847	137.103
99.2502	32.0049	80.2744	24.1781	63.5869	86.3167
77.7803	5.6126	38.3947	58.082	74.1903	120.783
75.3178	24.6925	159.875	164.198	185.846	42.8073
168.661	50.6673	219.738	135.694	137.486	202.359
121.496	16.0729	202.639	16.0567	187.8	140.669
74.0987	33.8346	86.6211	79.274	85.6809	121.687
82.2318	17.1545	8.51852	27.052	134.365	123.543
82.1738	17.538	23.8759	109.415	150.515	116.939
62.2961	58.6367	30.4281	172.77	109.271	71.3898
35.6835	6.23399	167.248	20.3085	127.11	25.7052
76.206	42.5811	132.709	99.2688	182.196	110.202
107.867	132.229	40.712	111.018	151.947	305.525
85.7366	23.3774	29.1718	224.206	77.6856	247.16
11.1819	18.5691	132.13	49.559	122.752	349.614
34.9364	18.6097	150.216	81.6727	111.178	124.86
51.92	178.208	85.8191	181.782	160.291	132.093
41.5416	199.651	90.1827	60.7186	66.0989	97.7822
22.1827	137.122	52.3927	97.9429	136.058	108.284
44.0536	23.7931	82.3964	78.9778	58.6901	151.344
49.377	30.7735	29.4365	47.8723	77.441	101.686
34.0726	120.528	58.2352	60.7766	84.576	133.783
58.112	65.68	112.894	232.846	97.2463	378.073
36.9178	370.445	90.1036	119.346	183.656	287.083
54.9957	120.731	92.5097	244.215	230.55	122.283
39.1108	225.017	76.0301	50.7775	46.8017	140.971
61.1259	39.4044	44.5186	100.574	80.4217	294.864
31.3551	144.806	40.2842	86.2927	103.168	127.458
49.7702	100.302	18.36	45.0361	32.2275	149.162
27.5063	157.472	180.836	91.6556	156.614	232.306
49.5567	95.9649	95.0431	181.485	27.8173	157.641
12.1494	89.4726	57.0181	107.604	196.73	237.588
57.6464	28.4071	249.633	55.8298	24.5196	182.499
77.6442	23.5028	41.1666	157.305	108.354	190.044
82.4142	22.0436	47.324	109.201	123.761	53.5845
79.4811	39.0992	156.342	34.7004	141.107	62.0384
34.9132	48.2191	42.1724	159.677	112.999	308.571
47.2235	73.7179	38.9272	36.8874	71.7079	184.751
38.6368	108.102	32.5226	99.3659	43.5893	290.539
142.81	72.3139	78.957	78.1282	139.317	117.606
28.1461	73.7253	133.246	147.326	194.102	204.561
74.997	60.351	51.5699	271.172	226.252	175.222
73.7206	42.0965	113.217	156.452	248.199	64.8914
144.015	106.633	72.201	141.266	110.708	356.694
54.6617	107.855	181.545	66.6718	21.3129	62.1434
76.4294	40.2921	110.842	137.535	90.0797	88.6061
133.805	56.4616	51.8619	218.455	99.6186	177.813
6.35437	52.7486	34.4577	130.442	86.4009	105.929
69.7079	23.1792	19.6574	369.234	115.698	273.574
86.3492	25.6519	20.0938	242.526	217.012	279.061
192.055	102.864	87.6969	183.065	184.577	176.386
247.363	54.3578	106.187	139.365	61.5753	185.56
63.0558	30.5203	14.6052	106.189	209.422	276.103
61.7073	35.7895	110.471	95.9008	57.1708	101.066
109.727	114.346	201.363	32.4377	68.0678	255.07
74.7308	178.96	83.1474	58.3835	117.488	133.794
49.5801	99.7327	44.9599	40.6937	168.125	170.118
12.5897	80.1435	44.9024	79.6837	202.404	215.949
32.8287	78.492	76.471	75.0105	162.196	73.3791
65.5675	297.959	50.631	108.275	243.856	271.756
31.9787	196.565	41.0332	66.723	11.5911	117.506
40.084	54.5952	40.6293	66.8199	141.897	172.009
125.58	108.089	54.1798	69.1154	125.338	145.251
32.395	38.5397	97.1322	74.7744	179.355	189.702
77.2953	70.2165	44.4604	93.2439	197.846	80.3378
43.9637	12.2609	115.603	219.501	28.6118	262.1
54.9055	24.4287	26.1475	47.2906	181.413	127.496
47.3668	33.8117	60.2681	53.849	128.658	181.157
20.7635	20.0725	74.9412	60.3748	196.654	321.59
28.629	36.25	46.7563	61.6621	148.144	102.52
15.4374	73.2976	78.4334	8.74011	222.376	271.468
77.2689	37.0152	54.815	148.328	92.2221	123.823
46.689	83.8802	36.3	127.168	100.261	255.789
43.8729	51.4535	50.285	85.4822	131.009	48.5964
72.3719	45.8167	104.268	31.6063	114.074	108.514
22.8363	36.6156	113.283	218.95	86.3345	310.471
79.0162	94.6035	13.4267	25.3803	101.366	342.857
56.2369	56.4181	47.1375	65.1886	193.625	98.2642
81.2209	118.703	28.8638	148.508	246.633	212.236
73.1597	82.3012	116.888	301.374	59.4922	214.333
58.4061	53.479	64.8024	78.7782	160.945	150.399
72.2874	95.942	80.1532	12.1069	194.492	282.867
233.455	89.8989	35.6551	176.187	112.071	119.853
30.0368	99.2502	76.0041	206.057	193.431	181.801
52.9436	77.7803	58.483	103.107	82.812	212.454
48.3627	75.3178	30.898	168.833	217.504	174.151
13.7593	168.661	77.4657	82.6772	197.888	186.905
21.2922	121.496	23.6399	115.47	90.397	61.1237
23.2652	74.0987	184.772	44.6262	168.631	141.177
40.4347	82.2318	107.712	109.806	145.911	154.578
16.479	82.1738	53.8495	17.441	116.28	91.7337
6.33324	62.2961	39.1207	32.1895	20.2508	87.3193
45.0961	35.6835	55.3098	60.8827	32.0097	179.924
68.1296	76.206	167.874	312.421	210.707	393.238
62.3706	107.867	144.1	113.31	80.9314	150.686
84.5863	142.132	170.916	109.835	10.5361	240.043
74.58	85.7366	101.906	77.0018	194.163	258.759
35.0346	11.1819	208.535	33.299	112.353	320.294
11.4353	34.9364	147.391	125.678	153.912	142.623
42.2069	51.92	51.7823	243.482	183.649	246.972
84.227	41.5416	79.1852	60.7781	63.6521	204.633
55.5152	22.1827	45.1354	128.304	85.4279	52.3664
159.396	44.0536	62.515	275.924	40.8723	269.849
109.275	49.377	63.9726	168.89	196.09	140.131
48.5182	341.762	17.7369	162.687	193.877	55.4842
96.5155	299.069	87.4946	48.2502	128.329	71.5626
142.916	34.0726	33.6222	21.4	179.832	190.503
130.016	58.112	5.72198	203.76	215.711	108.082
66.8665	36.9178	99.9514	293.348	200.607	289.085
197.199	54.9957	118.25	59.7556	234.205	317.708
18.1877	39.1108	75.5875	132.745	54.3106	218.383
42.941	61.1259	97.8216	9.28495	220.337	234.881
46.0995	31.3551	109.677	51.8498	116.289	62.4607
50.782	49.7702	63.505	224.921	74.731	266.618
8.89989	27.5063	33.5806	170.418	238.771	203.941
12.8515	49.5567	16.9597	94.1615	125.486	68.2752
31.5874	12.1494	47.0026	82.1967	96.6588	312.161
16.988	57.6464	70.3295	239.209	51.7495	84.3462
63.3826	77.6442	15.9313	313.224	204.969	239.654
47.3166	82.4142	58.4993	284.6	154.479	347.468
105.28	79.4811	28.6924	92.8889	137.768	280.651
34.1594	34.9132	139.599	30.1213	166.335	93.6521
21.8439	47.2235	162.738	251.333	80.9593	74.4616
81.3002	38.6368	33.0216	220.15	198.53	123.829
70.7985	142.81	3.93955	235.4	63.7034	41.2505
35.2068	28.1461	175.306	17.9671	66.9654	112.193
16.7784	74.997	61.7794	80.5137	86.0474	117.735
24.95	73.7206	128.992	64.3904	110.512	57.0362
63.2882	144.015	7.46577	82.5987	52.3109	163.614
70.381	54.6617	190.327	11.3162	71.9031	128.778
61.4604	76.4294	98.4982	159.017	64.1096	139.956
18.0854	133.805	214.395	17.8144	249.109	178.731
63.4497	6.35437	57.6577	104.125	64.7585	156.92
44.6213	69.7079	51.0894	79.6906	128.212	187.377
13.0744	86.3492	112.432	41.2769	217.122	327.355
50.0213	192.055	190.633	106.759	128.394	80.8574
51.2281	247.363	157.221	49.4392	229.427	89.0399
128.815	63.0558	174.129	192.8	55.3747	159.594
85.5573	61.7073	202.635	56.0616	199.677	146.497
35.0896	109.727	168.052	285.216	5.17559	207.623
60.3304	74.7308	78.8762	185.306	92.1479	132.438
79.104	49.5801	14.0821	194.406	71.5598	166.015
20.4286	12.5897	203.925	363.619	98.8534	183.702
21.6227	32.8287	127.766	237.846	156.377	170.161
36.8215	65.5675	123.603	152.932	121.982	156.071
17.8994	31.9787	215.729	84.7237	220.351	148.466
19.9508	40.084	216.241	108.171	230.515	187.511
16.4495	125.58	53.069	270.427	135.468	137.976
41.9611	32.395	86.8337	29.2431	228.086	224.075
76.9542	77.2953	186.575	135.864	213.594	339.47
50.8464	43.9637	95.4599	77.6727	174.148	189.491
6.48	54.9055	181.699	8.69898	71.1179	286.633
39.4394	47.3668	58.442	83.007	232.294	83.4652
15.7674	20.7635	44.2437	122.087	82.222	174.858
29.9396	28.629	42.2324	69.0903	157.986	46.4575
44.3247	15.4374	141.564	61.7216	140.29	192.169
39.3677	77.2689	21.4084	71.2727	79.7704	83.8384
59.6739	46.689	18.8095	39.6071	93.2898	192.317
125.419	43.8729	132.973	202.07	90.3308	360.992
123.444	72.3719	92.5175	261.655	103.62	163.694
177.204	22.8363	171.285	92.5592	110.412	194.232
120.609	79.0162	55.311	146.033	120.972	86.1801
41.1924	56.2369	55.4743	96.741	132.951	287.396
69.7599	81.2209	210.308	58.0681	42.1655	93.8153
39.0415	73.1597	63.9248	149.354	146.872	271.796
88.8239	58.4061	82.6625	194.019	106.934	266.605
16.4173	72.2874	119.015	86.028	196.266	216.451
29.8071	233.455	38.58	80.364	189.023	334.941
12.5043	30.0368	66.6982	118.072	157.348	231.726
107.065	52.9436	184.886	243.645	193.322	258.35
114.523	48.3627	221.44	222.92	209.191	147.807
5.51537	13.7593	52.2588	31.2892	154.848	334.97
12.3672	21.2922	79.009	83.8377	100.648	30.1109
62.4659	23.2652	198.396	73.729	93.3195	189.15
35.0116	40.4347	116.763	93.6847	125.921	361.417
38.0326	16.479	206.403	183.203	22.4214	235.181
29.1277	6.33324	170.029	94.2437	52.5347	113.265
43.9508	45.0961	217.831	263.983	60.3857	66.4011
103.308	68.1296	221.176	345.808	155.938	323.937
137.647	62.3706	21.9664	93.1706	23.7978	114.792
78.3909	84.5863	71.6281	90.2868	216.248	169.708
38.7797	74.58	160.57	93.7219	102.416	204.485
53.2249	35.0346	134.32	85.2528	221.83	75.7375
112.01	11.4353	87.3529	235.067	45.7639	134.971
102.473	42.2069	97.5165	147.303	176.364	355.036
23.2915	84.227	105.358	196.819	137.563	56.72
76.3381	55.5152	57.3195	219.563	12.2773	231.503
70.3722	159.396	36.3632	184.617	155.974	329.347
129.955	109.275	113.52	61.7492	119.014	80.403
25.44	48.5182	220.108	82.9085	61.4583	333.198
44.8366	96.5155	79.9076	157.776	40.459	226.43
45.982	142.916	107.944	163.858	126.605	247.17
134.024	130.016	22.5325	195.944	72.6964	186.826
71.7298	66.8665	55.3856	133.293	41.5291	334.887
27.5308	197.199	130.566	157.177	173.314	84.0153
23.4223	18.1877	205.512	164.449	198.023	180.087
15.4183	42.941	52.5209	130.159	170.305	62.2688
83.2358	46.0995	48.6938	113.714	178.085	132.55
65.6248	50.782	101.081	213.681	46.245	108.698
116.93	8.89989	64.5933	175.742	94.1727	103.634
205.667	12.8515	248.445	338.506	80.6266	75.7052
51.5181	31.5874	174.545	151.518	74.2531	27.3497
31.2584	16.988	220.616	57.9094	190.208	216.44
48.4201	63.3826	95.7037	25.6431	247.601	182.539
63.574	47.3166	58.643	39.6426	222.076	253.15
100.453	105.28	157.056	109.701	30.0102	89.5513
55.3674	34.1594	98.2649	62.7625	205.825	85.8648
70.5847	21.8439	87.5433	42.9339	246.059	143.394
97.5551	81.3002	180.062	28.7422	87.5573	31.9125
66.876	70.7985	91.267	122.748	39.9459	147.429
83.931	35.2068	17.8182	44.4381	144.591	91.7798
72.8122	16.7784	116.691	101.329	97.2095	83.0552
8.3433	24.95	217.768	121.064	23.5093	191.617
55.5904	63.2882	74.4297	100.215	121.058	94.0941
45.4962	70.381	150.409	169.192	221.107	17.6509
34.9142	61.4604	212.91	52.4984	99.4358	130.449
125.568	18.0854	99.1944	37.1164	94.9249	69.7173
26.1385	63.4497	121.052	66.03	62.6897	227.661
24.141	44.6213	165.998	233.227	81.8716	269.588
29.7598	13.0744	247.245	221.568	183.911	30.0573
20.789	50.0213	68.8655	115.632	94.2932	242.843
7.31209	51.2281	24.0004	24.6832	104.728	314.268
66.4701	128.815	83.2766	77.1807	9.70744	259.302
55.5509	85.5573	41.9166	80.0001	196.571	143.897
42.2225	35.0896	61.671	25.8036	159.559	172.68
37.1114	391.751	36.4468	121.838	242.593	117.064
27.2898	69.3207	102.917	91.668	103.793	306.107
18.1971	60.3304	102.193	45.4583	64.7437	152.465
48.9349	79.104	65.4318	47.2548	243.005	188.74
73.1946	20.4286	14.3695	139.947	244.102	15.6943
35.2187	21.6227	178.815	68.8881	113.459	126.544
3.15729	36.8215	113.101	115.65	93.5304	117.378
53.3402	17.8994	122.445	115.248	185.831	91.7366
78.3661	19.9508	60.0121	280.758	156.939	213.495
37.8301	16.4495	66.2484	137.287	66.1421	242.791
169.241	41.9611	18.069	219.867	126.814	104.536
87.1403	76.9542	23.8609	105.209	82.7383	238.913
16.4091	50.8464	43.1004	118.017	68.4001	200.236
61.0791	6.48	109.164	236.406	133.548	50.842
90.1794	39.4394	103.765	70.0202	233.315	69.3293
23.7413	15.7674	59.3667	161.961	59.487	135.83
60.5226	29.9396	130.809	45.9025	91.3838	157.157
20.4908	44.3247	71.9532	173.893	174.421	20.2227
162.302	39.3677	38.8384	62.8988	230.178	283.624
68.4615	59.6739	11.1302	54.7141	85.8928	371.5
26.4596	125.419	103.208	134.455	171.231	332.075
33.3654	123.444	26.6026	90.9171	75.1846	85.7343
67.3026	177.204	48.8985	237.203	101.504	126.071
51.4566	120.609	59.4098	64.329	233.342	37.7684
16.7678	41.1924	243.479	123.245	139.889	246.795
46.6569	69.7599	151.194	146.404	58.9274	213.042
75.5286	39.0415	75.8506	120.359	59.0567	98.6705
61.7218	88.8239	70.8877	23.5966	140.229	52.401
21.1295	16.4173	96.5138	119.491	147.013	85.5447
21.4282	29.8071	68.2345	221.409	109.785	158.455
67.548	12.5043	58.0069	28.8422	247.419	218.841
54.6435	107.065	27.0948	311.3	185.785	215.189
105.159	114.523	157.127	183.558	79.6989	71.1721
33.1712	5.51537	212.58	160.228	98.6094	135.221
152.425	12.3672	46.31	67.9662	122.45	111.37
13.102	62.4659	72.7091	46.9793	76.9386	160.3
26.9904	35.0116	52.3425	42.7948	88.3242	74.1907
30.5698	38.0326	29.9408	94.2106	179.204	128.133
100.786	29.1277	95.6655	29.3343	63.8453	314.448
65.5705	43.9508	85.6058	79.6424	247.577	58.4616
41.7282	103.308	248.756	77.9755	230.878	34.1621
24.6419	137.647	175.477	66.7012	215.639	156.996
12.3435	78.3909	61.911	124.134	60.5788	213.332
59.2763	38.7797	57.9938	84.5081	140.894	264.65
82.8188	53.2249	32.66	23.886	161.484	281.967
13.805	43.121	134.508	77.7788	108.082	122.979
87.744	397.083	201.618	186.902	194.881	212.536
12.0072	170.636	169.608	117.449	112.02	241.966
26.2809	112.01	136.012	303.254	86.1976	102.108
83.6281	102.473	103.141	260.993	103.165	239.766
65.5059	23.2915	241.46	275.868	126.863	208.818
139.872	76.3381	112.613	105.304	120.018	371.575
16.5027	70.3722	20.0454	74.7384	30.1156	258.853
77.8554	129.955	208.147	69.2891	79.6499	70.7529
123.583	25.44	42.8272	46.2498	101.327	270.542
66.2541	44.8366	33.1087	84.7665	100.78	218.751
97.4938	45.982	82.7524	7.56904	159.594	87.4197
80.7589	134.024	5.60748	46.9423	56.6942	76.049
34.0817	71.7298	70.9156	72.2021	211.674	223.316
48.8877	27.5308	118.21	237.401	206.499	313.034
14.9643	23.4223	73.4504	95.4943	197.265	256.646
10.2019	15.4183	217.808	231.919	82.64	225.738
82.9884	83.2358	60.5219	204.399	143.5	148.36
34.9425	65.6248	247.987	119.783	128.193	25.9779
69.5575	116.93	34.1086	61.2332	212.964	79.019
220.262	205.667	50.4528	53.1505	71.3359	20.843
143.673	51.5181	64.032	46.2822	239.519	84.5778
44.1974	31.2584	53.301	44.8146	88.5175	328.862
28.2266	48.4201	47.3532	56.7577	209.689	390.619
21.5357	63.574	59.6148	108.738	70.2018	318.851
46.0136	100.453	134.665	12.3694	155.655	207.908
49.8344	55.3674	83.6309	134.493	94.9253	143.367
83.1822	70.5847	108.197	115.612	184.673	282.203
33.6629	97.5551	48.3089	72.8597	49.7213	141.89
8.71638	66.876	82.5967	24.211	134.566	205.311
6.47326	83.931	63.8406	315.502	136.104	180.236
33.5339	292.369	116.765	243.155	107.126	94.2627
55.3711	248.327	84.1927	340.64	176.915	202.464
63.4499	72.8122	115.786	120.525	133.577	222.323
69.559	8.3433	130.578	107.357	118.398	85.54
38.5528	55.5904	156.169	163.511	189.542	153.336
6.09293	45.4962	34.8191	310.538	196.044	129.377
126.519	34.9142	176.234	60.7283	147.982	30.4491
62.8969	125.568	54.6033	187.74	55.3532	186.996
35.5546	26.1385	137.653	247.859	77.0543	164.078
17.3042	24.141	123.81	111.474	63.3582	200.597
45.8125	29.7598	45.8865	59.7028	47.8864	35.9848
23.218	20.789	34.7159	95.3668	52.409	376.76
14.6365	7.31209	69.7359	97.752	40.527	186.221
40.3194	66.4701	42.561	67.1402	117.343	372.598
98.4271	55.5509	77.5853	78.7852	229.851	24.8137
45.9495	42.2225	136.391	60.1105	136.27	215.671
50.9841	37.1114	148.023	71.1194	100.704	96.7833
35.7245	27.2898	83.5701	27.9181	121.823	164.595
17.914	18.1971	199.556	127.182	224.791	315.284
37.4888	48.9349	213.447	240.854	183.562	172.265
43.1244	73.1946	128.251	157.661	213.207	302.8
65.8632	35.2187	33.1236	354.99	192.43	288.548
78.3521	3.15729	88.3068	392.694	208.209	184.473
44.9296	53.3402	99.0714	288.623	168.501	156.72
70.9891	78.3661	182.921	88.2895	206.789	40.9589
37.4056	37.8301	16.5748	173.087	66.8185	214.433
67.1405	169.241	21.6448	55.4716	59.9595	100.737
167.59	71.6746	90.9158	304.851	95.4866	66.0928
111.146	87.1403	40.7786	123.171	128.956	161.634
82.8247	16.4091	58.5427	45.0582	195.462	193.117
109.681	61.0791	77.7858	118.774	164.526	189.024
54.027	90.1794	114.725	57.4005	225.813	377.173
52.7142	23.7413	68.443	70.5045	179.185	216.188
22.294	60.5226	69.4357	116.299	85.8578	39.4315
91.3168	20.4908	110.634	181.621	58.8006	96.0051
37.1618	389.899	158.57	174.501	51.6937	53.4204
65.0664	162.302	198.037	47.9534	123.909	121.391
108.281	68.4615	77.1288	139.091	171.703	172.007
64.0314	271.695	97.2589	70.6521	53.0849	140.946
92.1851	46.6569	211.957	173.248	100.518	53.8206
164.032	75.5286	27.4179	286.772	169.767	190.738
70.4923	61.7218	27.1909	40.4853	151.697	139.457
80.4194	21.1295	26.5173	21.1197	133.685	137.256
105.031	21.4282	60.5361	92.8165	56.1761	173.874
85.7279	26.4596	87.0979	342.871	94.7895	153.097
48.4357	33.3654	74.2483	76.2062	148.644	399.218
53.842	67.3026	227.429	52.3952	200.257	232.976
67.7423	51.4566	106.7	80.2744	137.098	62.511
89.9232	16.7678	88.2235	38.3947	115.309	81.2788
51.8558	67.548	248.54	347.681	245.88	122.932
59.7892	54.6435	144.184	285.299	124.577	134.026
96.7185	105.159	83.1626	159.875	140.212	73.7536
10.9772	33.1712	64.6326	219.738	136.976	167.162
72.9585	152.425	137.561	202.639	90.262	45.4715
84.3113	13.102	68.9604	86.6211	215.328	65.5384
34.2608	26.9904	121.938	365.324	175.282	172.486
132.099	30.5698	14.3803	358.877	173.258	60.9932
39.515	100.786	17.0077	8.51852	105.924	106.416
[truncated: 158,393 more rows]

## Sheet: panel c
	Repeats	Time=0 s	Time 0.00576 s	Time 0.01152 s	Time 0.01728 s	Time 0.02304 s	num of cells	num of traces
Live	R1	0	0.0171836	0.0315331	0.0433562	0.0550608	144	6733
	R2	0	0.0168313	0.0315683	0.0439727	0.0556074	111	4414
	R3	0	0.0166635	0.0319	0.0449409	0.0579083	103	5740
	Average		0.0168928	0.0316671	0.0440899	0.0561922
	standard deviation		0.000216724	0.000165258	0.00065223	0.00123384
Fixed	R1	0	0.00658116	0.00976366	0.0118225	0.0136556	159	5363
	R2	0	0.00647788	0.00946159	0.0114506	0.0132967	142	5075
	Average		0.00652952	0.00961262	0.0116365	0.0134761
	standard deviation		5.16403e-05	0.000151033	0.000185958	0.000179424

## Sheet: panel d
x (µm)	y (µm)	Speed (µm/s)	trajectory ID
3.78227	9.29801	22.8845	1
3.79625	9.29313	2.72043	1
3.7968	9.27747	12.2666	1
3.83728	9.33538	22.4092	1
3.72298	9.27541	7.76325	1
3.70808	9.26063	13.6793	1
4.17469	10.001	28.07	2
3.92357	9.93507	24.9098	3
3.85848	9.96982	14.4779	3
3.93426	9.93501	6.25826	3
0.608999	9.11782	5.49393	4
0.579697	9.10587	2.8165	4
0.582039	9.11232	5.79701	4
0.566292	9.18179	9.10678	4
4.94567	9.57493	5.77423	6
5.00697	9.5415	10.9007	6
4.97981	9.59811	1.87417	6
4.98988	9.602	4.77826	6
4.23447	9.54436	3.86773	7
4.21241	9.54125	13.3517	7
4.65956	9.44414	7.60728	8
0.583681	9.11469	11.0948	9
0.605481	9.06733	9.30416	9
0.572925	9.1099	2.00871	9
2.50237	9.48733	17.8029	10
2.50334	9.58987	15.429	10
2.52532	9.50376	13.772	10
2.48186	9.50615	7.50574	10
2.50109	9.5134	7.82245	10
2.54011	9.49087	10.4663	10
2.48372	9.46955	9.13859	10
2.47219	9.52091	31.2798	10
2.65068	9.49635	22.0946	10
2.52447	9.5127	6.47672	10
0.583383	9.13741	10.613	11
1.30175	9.61465	15.8985	12
1.35688	9.64265	14.8157	12
1.36308	9.65818	9.17711	12
1.31396	9.63865	4.84746	12
2.35621	9.28175	25.0811	13
2.32757	9.14015	7.93153	13
3.47744	9.39703	3.50291	14
3.50362	9.40407	5.32339	14
3.49366	9.37507	4.9673	14
3.4663	9.38344	11.6664	14
2.2068	8.99368	14.6403	15
2.18708	9.07567	8.12384	15
2.19628	9.02979	15.12	15
3.50422	9.39494	3.41991	16
3.48471	9.39222	11.2369	16
4.51922	9.27027	10.6333	18
3.16463	9.88079	4.67933	19
3.16682	9.85556	18.0235	19
3.26888	9.87457	20.2946	19
3.1568	9.90778	3.36319	19
3.15241	9.84332	11.1563	19
2.02835	9.89071	16.7422	20
3.18169	9.87125	2.87826	21
3.1912	9.88483	6.11703	21
2.09925	9.80415	12.25	22
2.10499	9.72593	19.9012	22
2.03725	9.81083	9.53337	22
2.10263	9.80349	6.66628	22
0.800086	9.30482	13.0728	23
0.738279	9.34783	14.1284	23
0.783031	9.27986	14.7614	23
0.838138	9.34461	4.18646	23
0.823966	9.3251	4.17976	23
4.03415	9.48009	10.0414	24
4.89808	9.4859	5.99485	25
4.01261	9.50522	4.80405	26
4.07125	9.48099	5.31286	26
4.07409	9.51146	2.31182	26
4.06393	9.49513	10.5123	26
4.00371	9.48881	9.07946	26
4.0522	9.5084	5.52525	26
3.93415	9.91389	3.07202	27
3.94344	9.92895	6.40962	27
0.794622	9.28684	8.14474	28
0.84149	9.28477	4.84329	28
0.822634	9.30533	1.97929	28
0.831679	9.31227	2.04788	28
0.823418	9.30385	4.28384	28
0.804867	9.28758	4.14038	28
0.818986	9.26836	4.19066	28
3.93193	9.91577	4.97814	29
3.97176	9.88586	7.88872	29
3.92768	9.89689	19.8439	29
3.93304	9.96478	21.0755	29
0.791668	9.31302	4.0651	30
0.812807	9.30295	1.73791	30
0.803478	9.30658	3.80686	30
0.820796	9.29313	6.28594	30
0.845273	9.31981	5.06725	30
0.837452	9.29169	3.1653	30
0.819249	9.29066	3.2543	30
0.846175	9.27074	7.03322	30
0.813494	9.29468	4.41207	30
0.831544	9.2832	7.02462	30
0.821902	9.30432	11.0409	30
0.76053	9.32099	12.3859	30
0.811935	9.27152	6.98393	30
0.83468	9.3047	5.40367	30
0.809445	9.28648	12.6872	30
0.786221	9.35577	13.062	30
0.7929	9.28083	9.16977	30
0.845342	9.28712	4.42419	30
4.11738	9.47443	9.73156	31
4.06133	9.47508	3.47039	31
3.92821	9.8712	7.64052	32
3.9273	9.9152	2.91155	32
3.9423	9.9227	19.081	32
3.92685	9.90481	7.02772	32
3.93021	9.94515	2.70069	32
2.47371	9.73102	8.29364	33
2.52248	9.74752	9.76504	33
4.10788	9.44644	9.01615	34
4.07282	9.46714	5.53793	35
4.04957	9.49382	6.91426	35
4.06267	9.45621	2.92201	35
4.05732	9.55322	11.4216	35
4.09762	9.50122	7.59382	35
4.05563	9.48897	0.862092	35
4.05079	9.49008	3.63749	35
2.99887	9.24436	6.73	36
2.942	9.28761	3.12504	36
2.8761	9.27182	26.5009	36
0.928843	9.22149	16.1093	37
0.836066	9.22303	10.6494	37
0.805185	9.27603	6.64211	37
0.836033	9.29866	9.83904	37
3.79614	9.65333	16.953	41
3.01196	9.28674	10.3998	42
2.18675	9.03096	15.3269	43
2.25693	9.08452	7.54608	43
1.57137	9.71891	10.2647	44
2.21031	9.10311	6.55694	45
2.17513	9.11685	10.8974	45
2.20785	9.13	20.2009	45
2.09303	9.14885	23.1632	45
1.58968	9.66982	8.20591	46
1.56642	9.72277	2.16382	46
1.57059	9.74486	7.04283	48
1.57307	9.88159	17.9776	48
3.01586	9.19657	4.95798	49
3.01242	9.22492	7.33485	49
3.00142	9.25675	4.7715	49
2.68031	9.19171	4.25078	49
2.66333	9.20935	2.29395	49
3.04416	9.15406	16.8319	49
2.99114	9.23523	2.05016	49
3.00284	9.23363	7.52456	49
2.98786	9.23051	4.65101	49
2.99695	9.21994	6.78326	49
3.03264	9.23584	18.0193	49
2.93385	9.26767	20.1444	49
0.967574	8.94211	64.5636	51
1.88409	9.30815	5.5533	52
1.85824	9.28931	0.679926	52
1.8629	8.97223	8.98858	52
1.91339	8.98369	9.35091	52
2.63805	9.21963	11.8339	53
2.32897	9.2831	5.09209	53
2.3583	9.28294	6.3418	53
2.35124	9.31878	9.12744	53
2.38285	9.27677	6.93628	53
2.34487	9.28917	7.65097	53
2.35687	9.2399	5.73611	53
2.34307	9.26992	6.12067	53
4.2975	9.47032	9.64482	55
4.2441	9.455	12.4943	55
4.24497	9.44112	17.7402	55
4.23561	9.45983	7.68286	55
1.83338	9.22668	10.1838	56
1.79962	9.17871	1.08057	56
1.79586	9.18367	7.39074	56
1.82255	9.22876	4.13564	56
1.80711	9.21062	5.34186	56
4.4568	9.19726	13.6228	57
1.8356	9.2489	7.31152	58
1.82001	9.20602	18.5116	58
1.74305	9.27982	18.7265	58
1.81063	9.19575	6.99217	58
1.77512	9.20826	13.1532	58
3.25095	9.74101	13.7567	59
3.15778	9.80646	9.49613	59
3.12647	9.76161	13.2714	59
1.77708	9.20638	5.69892	60
1.77624	9.17439	11.3808	60
1.82947	9.21265	5.55422	60
1.80172	9.19673	6.96275	60
1.77426	9.1675	21.7983	60
3.06226	9.69303	9.53067	61
1.77187	9.23266	3.60704	62
1.78762	9.21911	4.97065	62
1.81205	9.20418	2.67628	62
1.8268	9.20866	13.415	62
1.75586	9.23929	8.10464	62
1.80004	9.22421	7.6141	62
1.8418	9.23761	12.5671	62
1.79242	9.21395	3.96093	62
1.80826	9.23037	13.7208	62
1.82334	9.15279	9.76219	62
1.80712	9.20663	14.0974	62
1.81223	9.28767	12.7028	62
1.82149	9.21509	10.1402	62
1.77693	9.25285	12.5537	62
1.85962	9.26315	12.9494	62
1.79361	9.22842	6.08115	62
1.82849	9.22521	1.98284	62
1.83674	9.22047	7.32878	62
1.79612	9.23196	14.6243	62
1.80458	9.14815	9.63622	62
1.8274	9.21302	2.22787	62
1.83832	9.21976	5.4862	62
1.80922	9.20744	2.94552	62
3.43676	9.58536	40.5303	63
3.64623	9.48229	5.211	63
3.66642	9.5045	9.19383	63
3.64776	9.45494	8.39253	63
3.65811	9.50216	2.3933	63
3.65282	9.48943	3.69537	63
3.66072	9.48443	2.86482	64
3.65319	9.48647	1.1003	64
3.69264	9.5141	8.81876	65
3.66013	9.47507	1.54148	65
3.61732	9.46382	13.8885	66
1.82955	9.21772	6.39369	67
1.79483	9.23	3.10358	67
1.8125	9.23271	3.46595	67
1.79406	9.22506	2.85692	67
1.8239	9.22076	7.2871	67
1.80085	9.20951	5.19704	68
1.78784	9.23647	7.6967	68
1.81731	9.20335	6.83566	68
1.83287	9.20263	10.3612	68
1.76936	9.1831	18.5859	68
1.77279	9.2901	19.8839	68
1.72824	9.18578	21.1438	68
1.82738	9.21872	7.48243	69
1.84187	9.25931	68.9344	69
2.10512	9.55656	29.6225	69
2.32908	9.70912	22.5654	69
2.25794	9.60034	4.41915	69
2.23316	9.59452	7.78643	69
2.2119	9.59102	4.78181	69
1.81636	9.23382	11.425	70
1.82031	9.20924	4.74055	70
1.79351	9.21447	3.15767	70
1.78536	9.23073	8.50023	70
1.73993	9.21921	12.7078	70
1.80172	9.17997	6.11359	70
1.78578	9.21137	0.55024	70
1.78739	9.20864	9.26084	70
1.75881	9.25368	13.6073	70
1.8208	9.18404	4.12071	70
3.60719	9.63111	8.835	71
3.61454	9.62946	67.6879	72
3.97477	9.7786	28.1799	72
3.83633	9.69386	11.882	72
3.88687	9.74001	47.1724	72
3.6413	9.62372	8.09772	72
3.6231	9.60525	13.1128	72
3.55402	9.63579	10.7133	72
3.61105	9.65936	3.67079	72
3.59047	9.65451	3.71795	72
3.63721	9.60609	11.7288	72
3.58319	9.64666	9.48323	72
3.62652	9.67992	18.2571	72
3.73126	9.67052	5.75584	72
3.74533	9.70054	26.463	72
3.59355	9.68651	2.27844	72
3.58345	9.67813	4.68883	72
3.59697	9.65475	5.31204	72
3.58029	9.63077	17.4952	72
3.66909	9.67841	11.3855	72
3.60351	9.67813	7.24649	72
3.59623	9.63703	4.27539	72
3.88912	10.0009	11.6199	74
3.95834	10.0037	9.37853	76
0.936153	9.0931	10.3984	77
0.96656	9.09762	23.3093	78
0.907615	8.97699	14.556	78
0.966239	9.03693	16.0986	78
4.6935	9.83547	12.3609	79
4.63809	9.88018	11.0465	79
1.2117	9.60876	5.77115	80
1.24484	9.60616	10.1255	80
1.20103	9.56766	11.2163	80
1.20123	9.63482	12.4736	80
1.2658	9.60331	8.67268	80
1.21898	9.59036	10.1339	80
1.22055	9.64871	6.75587	80
1.20557	9.62033	8.35096	80
1.21621	9.66724	11.0219	80
4.64182	9.90549	7.46759	82
1.53834	8.88707	7.82503	83
4.20722	9.82205	13.7269	84
4.19107	9.74465	7.27104	84
4.18649	9.78628	22.6838	84
3.95665	10.0076	3.94193	85
3.89369	10.0831	19.6529	85
3.84937	10.0445	37.5304	85
3.99831	9.88782	13.7539	85
3.95213	10.0452	17.5629	85
1.35971	9.60978	7.43968	86
1.2827	9.607	9.66436	88
1.28493	9.60521	5.46598	89
1.30753	9.62713	7.09266	89
1.31947	9.6662	12.2616	89
3.06301	9.68203	12.2724	90
3.12718	9.71168	6.54487	90
2.40423	9.59436	2.67523	91
2.39432	9.60616	1.22891	91
2.39303	9.61312	3.05213	91
2.41021	9.61685	0.633583	91
2.40633	9.62535	8.17255	91
2.38611	9.66786	7.85022	91
2.41761	9.63542	11.7837	91
2.41087	9.61866	21.415	92
2.30509	9.55521	11.943	92
4.10103	9.90426	9.71082	93
4.04931	9.88296	7.48122	93
2.3955	9.62022	7.28665	94
2.39209	9.60575	10.0785	94
2.44254	9.63447	6.07578	94
2.41164	9.61804	6.88651	94
1.02358	9.4299	10.6338	95
1.0263	9.49109	14.0739	95
3.11499	9.6765	9.72079	96
2.44725	9.61537	4.21652	97
2.43138	9.61406	1.82582	97
3.54121	9.48417	13.4752	98
3.56032	9.56967	9.03605	98
3.58929	9.52643	16.0495	98
3.75507	9.52718	13.3596	100
3.68773	9.48994	6.1806	100
3.70192	9.52259	9.27457	100
3.75534	9.52299	6.88759	100
3.70472	9.5232	3.02744	100
3.69605	9.53833	0.882308	100
3.69999	9.53512	5.16659	100
3.71508	9.50947	3.87949	100
3.69845	9.5153	5.51126	100
3.7132	9.48719	13.8853	100
0.815113	9.53181	12.608	101
0.858095	9.50744	12.1852	101
0.79469	9.53754	4.12633	101
0.817602	9.53122	5.23137	101
3.63834	9.48524	12.3622	102
3.70685	9.50465	4.13725	102
3.72102	9.52381	7.07167	102
3.70128	9.48818	5.43653	102
3.68335	9.52918	5.31913	103
3.72613	9.50611	1.51349	103
3.70279	9.53922	6.97893	103
3.67753	9.52925	10.3666	103
3.72944	9.49974	7.43687	103
1.37406	9.82569	11.4472	106
1.31585	9.79472	8.78337	106
1.36548	9.80454	3.41327	106
0.910498	8.72664	7.84234	107
1.00251	8.76302	14.6019	107
0.963456	8.68853	30.5126	107
0.969459	8.86418	30.1452	107
1.01865	8.67763	14.2789	107
1.35197	9.77463	11.7581	108
1.41967	9.77274	7.93597	108
1.39956	9.81379	5.44197	108
1.00252	8.78642	19.5268	109
0.989008	8.67476	12.2671	109
1.00239	8.74414	7.11347	109
1.83271	9.19663	4.94445	110
1.73065	9.24392	16.9604	110
1.80791	9.24322	2.62709	110
1.80557	9.22827	3.03422	110
1.82068	9.21099	3.69561	110
1.84143	9.21574	6.42028	110
1.82389	9.26904	6.55127	110
2.68457	9.90316	5.94931	111
2.70726	9.87748	6.77399	111
2.66863	9.88297	4.13513	111
1.06076	9.61184	2.37898	112
4.56255	9.55632	16.1669	113
1.72473	8.84035	20.2211	114
1.64949	8.92926	17.3358	114
1.72536	8.86434	3.80856	114
1.70365	8.86749	11.655	114
2.03338	9.37117	8.61231	115
1.98828	9.35051	10.2593	115
0.816924	9.23713	7.32168	116
0.84424	9.22943	22.1698	116
4.68152	9.71781	27.6468	117
4.60806	9.57652	13.07	117
4.6265	9.64951	4.04807	117
4.63891	9.66925	5.27776	117
0.836329	9.23511	1.90164	118
0.863261	9.2804	10.5002	118
0.851986	9.2402	1.25922	118
0.845929	9.24419	4.00091	118
0.868972	9.24387	2.79059	118
0.852924	9.24296	5.52987	118
1.32142	9.32699	21.1204	120
1.4426	9.31627	15.3386	120
0.821069	9.54161	7.56775	121
0.85658	9.56689	2.3712	121
2.48175	9.5429	11.7046	122
2.42734	9.58271	15.5437	122
2.42328	9.61972	50.0575	122
2.44489	9.3322	15.5069	122
4.80621	9.89266	9.3892	125
4.85989	9.89924	7.39514	125
4.83711	9.87961	3.59621	125
4.82792	9.8623	10.7609	125
4.8069	9.92061	8.02808	125
4.81666	9.87541	8.20049	125
4.83345	9.83126	6.42506	125
4.83628	9.86816	4.71191	125
4.8318	9.89672	6.91341	126
4.82583	9.88521	1.37311	126
4.82395	9.88624	4.11307	126
3.62708	9.57702	8.58609	127
3.6364	9.58216	7.56502	127
2.2085	9.01457	37.5166	128
2.1444	8.97641	0.677039	129
3.17935	9.55692	9.05217	130
3.22891	9.57312	13.607	130
3.22483	9.49485	8.74744	130
3.17672	9.50982	3.72117	130
3.1923	9.52454	2.30901	130
3.1992	9.53591	8.16547	130
3.21735	9.5793	16.8094	130
3.17348	9.54923	3.32602	131
3.17839	9.54443	7.08075	131
4.1079	9.29694	13.0955	132
4.17113	9.33807	8.3769	132
3.17807	9.49445	3.07928	133
3.17193	9.51109	13.2203	133
3.21816	9.5716	4.28888	133
1.8905	9.21361	15.125	134
1.80486	9.19762	9.17671	134
1.83072	9.24372	17.3818	134
1.92405	9.27996	17.2009	134
1.8377	9.23138	1.00341	134
1.83887	9.22572	7.67657	134
1.8803	9.24117	10.7074	134
1.82091	9.2578	14.7742	134
1.90596	9.2549	7.66509	134
1.90406	9.21079	10.6479	134
1.86346	9.25676	6.20626	134
1.86021	9.22116	9.11848	134
1.82797	9.24421	5.90326	135
1.86116	9.2516	7.76283	135
1.81714	9.2614	2.22966	136
1.81523	9.2741	9.11603	136
1.81499	9.22811	16.9264	136
3.11757	9.59835	15.8149	137
3.23029	9.53722	6.75769	137
3.19263	9.52738	8.49521	137
3.20478	9.57478	8.39907	137
3.22108	9.52923	1.53981	137
3.22779	9.53503	2.05888	137
3.22169	9.5452	7.67075	137
3.25319	9.50475	18.9178	137
3.22671	9.54618	7.02434	137
1.82707	9.25875	0.909444	138
1.80651	9.19684	16.0418	138
1.86819	9.26564	7.47587	138
1.82572	9.27275	15.3266	138
4.27616	9.80067	5.09657	139
4.24867	9.81097	4.78248	139
4.22543	9.82576	6.21129	139
4.26118	9.82715	3.76775	139
3.70418	9.79184	11.9138	139
3.96982	9.95977	9.01606	139
3.92581	9.9322	4.54632	139
3.90897	9.89155	11.4704	139
2.37866	9.40889	6.75829	140
2.41721	9.4143	1.75502	140
2.41041	9.42178	1.37847	140
2.40832	9.42944	4.23982	140
2.30818	9.99383	2.88176	141
2.30335	9.97947	9.86163	141
2.32038	9.92528	7.36179	141
2.29422	10.0097	8.61857	141
2.32525	9.97095	5.16907	141
2.30323	9.99099	3.09609	141
2.25255	9.98625	14.2388	141
2.29744	9.97842	4.14349	141
3.65096	9.03489	25.7438	142
3.77882	9.16169	14.0055	142
3.76209	9.11165	2.30519	142
2.41205	9.46785	10.3267	143
2.37492	9.42138	3.63495	143
3.16355	9.56688	16.0228	145
3.07284	9.54987	5.83199	145
2.39367	9.43746	5.25102	146
1.55972	9.00686	3.67035	148
3.0454	9.4987	1.79455	150
3.01924	9.49779	11.6702	151
3.03645	9.56277	10.478	151
3.20836	9.48461	29.1046	151
3.11111	9.59652	13.54	151
3.08853	9.52187	14.7827	151
3.03597	9.58886	4.63386	151
3.01609	9.57105	8.11646	151
3.03777	9.52963	10.7027	151
3.08467	9.56964	3.51474	151
3.10676	9.54026	11.759	151
1.52112	8.92635	27.9698	152
3.0492	9.52656	9.71201	153
3.07803	9.5745	14.3409	153
3.13137	9.48494	17.8377	155
3.04016	9.53224	19.0683	155
1.53609	8.9819	5.71326	156
3.05883	9.5025	9.18145	157
4.79044	9.2732	14.3007	158
4.86953	9.29622	13.8384	158
4.79316	9.27339	7.21123	158
4.83421	9.26705	5.79073	158
0.576602	8.98741	55.3744	159
1.01266	9.12894	20.8195	161
0.93988	9.22425	27.2629	161
3.59314	9.34367	7.17058	163
3.53049	9.34863	24.7739	163
3.59099	9.3489	7.225	163
3.60789	9.38693	7.65378	163
3.56444	9.39439	8.8411	163
3.61477	9.40215	13.9475	163
3.64269	9.32682	16.5684	163
3.58675	9.40414	16.3253	163
3.65273	9.33714	14.4906	163
3.63925	9.41951	4.41469	163
3.6631	9.41069	18.0656	163
3.57705	9.35218	8.74807	163
3.54157	9.38796	16.6317	163
3.61802	9.33023	5.50342	163
3.6036	9.35846	6.1871	163
3.48805	9.33118	10.4045	163
3.66492	9.32367	31.1904	163
3.5105	9.41549	24.6781	163
3.65187	9.40066	13.5959	163
3.5768	9.37836	12.5611	163
2.36782	9.85241	44.4578	164
2.29697	9.76812	20.9067	164
2.36103	9.87009	5.55238	164
2.4502	9.80191	16.9655	164
0.860445	9.52653	1.68809	165
0.852185	9.53166	3.55296	165
0.870815	9.54013	0.752324	165
4.76599	9.78454	29.8542	167
2.51166	9.46826	18.7838	168
2.4845	9.57299	23.364	168
0.880809	9.57396	9.13638	169
0.849461	9.53169	4.37651	169
0.869442	9.51632	7.86007	169
2.36474	9.44162	11.2536	170
3.63087	9.52069	7.56381	171
3.63644	9.47748	7.4842	171
1.90621	9.24387	13.9101	172
3.59796	9.56775	16.34	173
3.56715	9.54066	9.92837	173
3.60003	9.49387	13.8642	173
3.64607	9.55912	9.15176	173
3.64485	9.50642	1.91508	173
3.60717	9.52517	8.49306	173
3.65609	9.52512	4.90274	173
3.6283	9.53014	1.194	173
3.62205	9.53301	1.03864	173
3.62843	9.47234	11.9635	173
3.64454	9.53934	11.317	173
3.58385	9.51555	10.3434	173
3.62978	9.52428	6.48208	173
3.64478	9.49919	3.61504	173
3.66246	9.51019	8.05154	173
3.6163	9.51467	8.0875	173
3.59506	9.55613	11.0253	173
0.835586	9.58906	8.03513	174
3.60062	9.50892	8.44227	175
3.64871	9.51613	9.62708	175
3.58946	9.5113	12.6464	175
3.66218	9.51554	9.18802	175
3.6456	9.53991	6.213	175
3.65474	9.50531	5.47598	175
3.94608	9.9987	50.1736	176
3.73985	9.79624	51.4152	176
3.76844	10.0003	11.8202	177
3.83476	10.0157	13.8676	177
3.84602	9.93662	1.67658	177
3.70785	9.50951	6.64523	178
3.67149	9.52147	11.7932	178
3.5938	9.51352	26.5716	178
3.65357	9.54549	5.73261	178
3.63117	9.52123	1.64591	178
3.63603	9.51309	1.76047	178
3.62589	9.51301	4.02414	178
3.63465	9.53447	0.678164	178
3.63696	9.53132	6.53901	178
3.61138	9.50824	12.7928	178
3.6253	9.43588	14.9295	178
3.60474	9.51938	9.96899	178
3.63644	9.5284	2.34185	178
3.62773	9.5181	8.71138	178
3.592	9.55333	7.47048	178
3.61075	9.5146	16.7335	178
3.64283	9.51363	10.6352	178
2.76285	9.18421	9.49578	179
3.6021	9.51901	13.9454	180
3.64795	9.56922	12.1634	180
3.60364	9.51495	5.0216	180
3.61999	9.53881	1.53899	180
2.8562	9.70237	44.9214	182
1.98858	9.96153	18.221	183
2.02421	9.88718	3.96188	183
2.05717	9.93783	8.79284	183
1.95672	9.90569	20.6163	183
2.84142	10.0027	4.31377	184
2.8629	9.99021	8.69373	184
2.9027	10.0206	16.9598	184
1.89795	9.18846	2.28008	185
1.3574	9.89619	6.18632	186
1.38006	9.86869	1.34619	186
2.006	9.86759	15.8876	187
2.06545	9.49322	15.4419	189
2.03366	9.57629	33.652	189
1.83984	9.57384	27.1355	189
1.99578	9.58445	15.9158	189
3.29002	9.64512	6.23177	190
3.32591	9.64572	9.73656	190
3.28555	9.60678	5.39706	190
3.28857	9.63772	5.61798	190
3.2988	9.60702	14.8777	190
3.24131	9.67057	13.9585	190
3.29726	9.61283	9.68137	190
3.34857	9.59099	17.6686	190
3.27067	9.65648	4.08027	190
3.28014	9.63497	5.3477	190
2.03118	9.53363	13.6022	192
1.99729	9.46299	7.60078	192
2.01531	9.50289	11.6521	192
5.05708	9.37029	14.3035	194
5.12492	9.32354	20.4944	194
5.02377	9.3844	3.31911	194
2.6802	9.6444	7.03869	195
2.71135	9.67035	10.922	195
2.65614	9.64019	12.4055	195
2.70004	9.69657	0.943348	195
2.73354	9.67791	12.223	195
2.69999	9.6571	7.12308	195
2.72679	9.66532	5.17777	196
2.75023	9.68376	1.64362	196
1.74857	9.26809	4.32316	197
1.75122	9.24333	3.25534	197
2.08895	9.98007	6.52438	198
4.12616	10.0231	4.95207	199
4.09308	9.987	6.3713	199
4.10613	10.0213	5.35892	199
4.15371	9.98857	7.2459	199
4.08936	9.98613	8.7792	199
4.13696	10.0032	1.70115	199
4.14411	10.0099	6.48433	199
4.12713	9.97791	4.3503	199
4.11868	10.0015	7.73117	199
3.12076	10.0106	12.4379	200
3.06948	9.96057	7.9382	200
4.15071	9.95379	7.64	201
4.09264	10.0292	7.50243	201
4.13224	10.0119	5.56903	201
4.12527	9.98868	3.73471	201
4.13532	10.0077	2.20152	201
4.12371	10.0128	4.31322	201
4.17589	9.98178	13.5691	201
4.09925	9.96645	4.62902	201
4.1086	9.99142	5.08048	201
