# Supplementary material for: Dynamic interactions between the RNA chaperone Hfq, small regulatory RNAs, and mRNAs in live bacterial cells
Source: eLife. 2021 Feb 22;10:e64207. doi: 10.7554/eLife.64207 (PMC7987339; doi:10.7554/eLife.64207)
Supplement: Figure 1—source data 1. [file elife-64207-fig1-data1.xlsx]

## Sheet: 1b
x (µm)	y (µm)	Speed (µm/s)	trajectory ID
8.62669	8.41661	30.1428	1
8.59869	8.24526	19.2047	1
8.64948	8.34353	44.0992	1
8.45183	8.50308	36.906	1
8.54703	8.31301	22.6739	1
8.65359	8.2375	13.5849	1
8.57202	8.18662	31.9304	1
8.31936	8.00279	35.7978	2
9.24123	9.7669	8.75138	3
9.25618	9.81504	48.3832	3
7.97544	7.79363	10.0497	4
8.30101	7.6511	6.99376	4
8.44735	8.37516	19.4684	5
6.9087	7.21767	18.9414	6
9.73698	10.1489	38.8137	7
9.88097	10.5399	15.8856	8
9.12502	9.54085	51.5393	9
9.4211	9.35352	58.1669	9
9.24888	9.06613	23.0056	9
9.17698	8.95482	16.2387	9
9.02992	9.1894	45.3841	9
7.13257	7.4919	16.0252	10
7.10407	7.46043	25.4151	10
9.53791	9.35427	6.778	11
9.51801	9.37827	7.02711	11
7.19574	7.41195	14.774	12
7.19663	7.18527	21.827	12
7.2432	7.30205	22.858	12
7.04247	7.37899	48.6016	12
7.22607	7.16766	14.5277	12
7.2639	7.09302	48.4658	12
9.48864	9.17609	5.11143	13
9.46626	9.19522	11.0676	13
9.47826	9.25783	6.11151	13
7.45568	6.84688	65.19	14
8.70435	8.57858	43.5126	15
8.53667	8.76486	6.19531	15
8.5053	8.78187	14.2871	15
8.42993	8.74883	21.665	15
8.49251	8.95717	5.9731	15
7.57809	7.78648	20.8902	16
7.57194	7.66631	7.59631	16
7.18756	7.41752	21.8751	17
7.25009	7.52691	38.0007	17
7.30825	7.8943	33.5681	17
7.44957	8.12285	17.7088	17
7.48361	8.14612	14.674	17
7.56488	8.1229	19.7387	17
7.84739	7.90471	12.2629	17
8.18735	7.68226	17.9799	17
7.20823	7.64177	8.44545	18
8.28253	9.08003	23.9089	19
7.7691	7.83665	3.65916	21
9.86052	9.50412	45.8571	22
6.73525	6.99077	11.2801	23
6.73184	7.01126	9.67976	23
9.74629	9.61861	9.9216	24
9.70582	9.57826	10.9789	24
8.45784	8.39672	12.9344	25
8.45385	8.75018	44.5629	25
8.58471	8.52936	17.8743	25
8.28781	8.54679	10.6926	26
7.95924	8.62528	19.9637	26
8.0501	8.69576	18.3392	26
8.12864	8.62512	18.9174	26
8.02864	8.58184	10.7611	26
7.97379	8.55297	16.182	26
9.08545	9.67039	25.1472	28
9.01065	9.54635	68.7204	28
10.141	10.3259	60.4445	29
10.118	10.6733	27.4042	29
8.01243	8.61935	29.5716	30
8.16441	8.69626	32.4814	30
9.8599	10.2762	57.8685	32
9.61216	10.4992	33.5733	32
9.4207	10.472	34.4161	32
9.61098	10.4164	40.5531	32
9.38111	10.3749	22.0047	32
9.43957	9.80577	32.204	33
9.45584	9.99055	13.5913	33
9.43194	10.4155	8.24597	34
9.39113	10.4398	8.78035	34
9.41208	10.387	16.4096	34
9.46561	10.4649	8.6016	34
9.42641	10.4952	8.44942	34
9.47188	10.4804	13.383	34
9.508	10.5485	3.65346	34
6.76868	7.19385	10.5432	35
6.7098	7.20872	4.43375	35
6.73229	7.22082	1.52223	35
8.23521	8.30371	34.7763	36
9.17472	9.12465	6.01702	37
9.14946	9.14838	44.1653	37
7.81439	7.33732	13.6932	38
7.69763	7.1277	14.9788	38
7.79818	7.43085	38.2493	38
7.58777	7.36553	19.7511	38
7.49696	7.43406	28.5361	38
7.5974	7.30395	16.7837	38
7.60888	7.20796	17.8783	38
9.02699	9.02989	7.21198	39
8.26346	8.61956	41.0391	40
8.68442	8.86641	60.4904	41
8.33933	8.9145	26.1661	41
8.39636	9.05401	22.0662	41
9.15974	8.94143	51.6614	42
8.53284	9.02718	5.96767	43
8.50155	9.01295	4.37923	43
9.78204	9.81654	41.3192	44
9.57666	9.69628	26.9033	44
9.72883	9.66699	20.7765	44
9.61335	9.69839	15.2059	44
8.94772	9.57884	16.3061	45
8.88266	9.5111	15.4046	45
9.1234	9.61029	14.0898	45
9.26923	9.72112	20.7878	46
9.3661	9.65074	36.1216	46
10.2692	10.6268	52.3466	47
9.92607	10.3738	24.5796	47
8.72525	8.91157	5.9783	48
8.75734	8.89908	11.6231	48
9.1104	9.00097	9.2401	49
9.15565	9.02899	7.31733	49
9.18391	8.99772	9.19655	49
9.13683	8.97344	24.099	49
9.1909	9.01623	4.87533	50
9.12525	9.09821	26.8844	50
9.18069	8.95362	11.5468	50
9.14627	9.01053	5.91882	50
9.12105	8.98759	9.88691	50
9.15631	8.94287	6.77071	50
9.1324	8.97368	6.92312	50
9.15866	8.94367	10.5593	50
9.1234	8.98594	20.77	50
9.24108	8.9644	16.2456	50
9.15796	9.00738	42.2785	50
9.29	9.212	37.4654	50
7.80667	7.25867	4.17224	51
9.49047	10.299	29.9208	52
9.48823	10.6627	19.9084	53
9.51417	10.551	36.3971	53
9.60557	10.5209	40.5835	53
9.18334	9.16619	20.0412	54
9.29169	9.23887	0.720517	54
9.14373	9.19675	12.8562	54
9.09161	9.20166	39.3365	55
7.47419	6.8568	26.837	56
7.2394	6.67998	12.1011	56
9.03568	8.88492	25.391	57
9.13245	8.99458	32.236	57
9.26653	9.21279	44.851	57
9.46317	9.50579	7.58308	58
9.50294	9.48773	18.371	58
9.49649	9.59335	5.51096	58
8.59649	9.25275	44.9479	59
8.80086	9.41169	14.3554	59
7.13572	7.45728	47.4706	60
9.71833	9.89537	32.381	61
9.63095	9.73059	29.3648	61
8.34134	7.87545	42.9464	62
8.39581	8.11675	43.1188	62
8.46297	8.13131	22.949	63
8.28246	8.49546	3.71774	65
8.27057	8.47765	41.7709	65
8.39971	8.48105	17.8822	66
8.34831	8.57031	20.7312	66
9.14661	10.1267	62.5997	67
9.38053	10.4011	15.1955	67
9.29399	10.388	16.3941	67
8.69169	8.27771	15.5958	68
8.70418	8.34296	15.8983	68
8.77903	8.34429	5.83143	69
8.76919	8.41481	11.3877	69
8.78329	8.35075	11.9178	69
8.76157	8.41587	2.02338	69
8.76731	8.4061	6.13389	69
8.76909	8.36907	3.97127	69
8.72777	8.29539	21.7597	70
8.74077	8.42005	15.2519	70
8.76146	8.33467	2.2018	70
8.54832	8.02333	13.9654	70
8.58094	8.09686	21.0406	70
8.40599	8.07121	15.5434	71
8.4115	7.98185	52.8303	71
8.57661	8.01503	10.3254	72
8.41907	8.00184	9.14665	72
8.505	7.99608	3.90125	72
8.26446	7.83592	3.13565	72
8.10845	8.18079	46.7398	73
7.87305	8.05015	64.5116	73
7.56883	8.26352	22.756	73
7.46615	8.18205	13.5641	73
7.52111	8.23758	23.543	73
9.174	9.34996	35.0873	74
9.45285	9.32181	7.67724	74
8.15165	8.05243	62.7918	75
10.2428	10.6523	8.55323	76
8.94156	9.6599	68.7713	77
9.44694	10.4107	26.5509	79
9.67272	10.8138	8.67712	79
9.72173	10.8236	17.8862	79
9.7623	10.7289	46.4259	79
9.77297	10.4617	36.7849	79
9.96335	10.3687	39.1616	79
9.80295	10.5273	16.8389	79
8.05748	8.66272	15.8897	80
7.97962	8.61461	4.84073	80
7.72855	8.36193	36.073	81
7.54505	8.26446	31.4527	81
8.0347	8.21025	52.7427	82
7.85152	7.96789	41.1939	82
8.43708	8.16765	23.2084	83
7.7196	8.57479	58.4087	84
7.85263	7.96746	61.9208	85
7.64464	8.2572	19.844	85
7.74666	7.69131	26.1564	86
7.80677	7.55316	30.6655	86
7.96188	7.63766	5.8617	86
9.09044	10.0595	37.0795	87
9.00146	9.86534	44.6741	87
9.05699	9.61408	46.1481	87
8.20608	7.87713	23.8536	88
8.33928	7.91083	7.94202	88
8.35831	7.86923	33.1882	88
8.31176	7.68382	26.1633	88
8.17361	7.62361	9.97151	88
8.17953	7.68074	17.3504	88
8.75611	9.38087	46.0646	89
8.56369	9.19818	36.092	89
9.06482	9.11835	21.4531	90
7.89217	8.0711	33.0785	91
7.72531	8.16308	6.5069	91
7.76155	8.15352	54.9752	91
8.00698	8.35361	16.7627	91
8.2459	8.32946	12.4937	91
8.42493	9.27412	13.0703	92
8.57148	8.44656	46.7479	93
8.83142	8.51682	59.0505	93
8.66946	9.40448	50.8492	94
8.3778	7.80081	10.1267	95
8.40718	7.75042	62.4123	95
8.09504	7.92876	43.4581	95
9.08013	8.84101	19.8179	96
9.4861	9.20453	3.46541	98
9.50652	9.17812	16.8119	98
9.17463	9.78933	55.472	99
9.11478	9.40557	5.34466	99
9.14431	10.0055	23.4186	100
9.18172	9.8759	25.7572	100
9.03443	9.8581	64.6354	100
9.43539	9.77171	46.7345	101
9.58143	9.83252	14.3135	101
7.68487	8.08759	46.6909	102
7.85805	8.29335	11.9189	102
7.40037	7.2913	17.3866	103
7.41793	7.77568	38.6699	104
7.54791	7.95656	13.2914	104
7.80143	7.92522	34.7979	104
7.64997	7.79394	18.8222	104
7.69387	7.89307	32.4981	104
7.67854	7.70651	57.4211	104
7.9816	8.35292	32.0866	105
7.79999	8.31863	12.5005	105
7.75818	8.26001	34.742	105
7.8308	8.41606	22.3348	105
7.23474	7.2717	40.8738	106
7.11085	7.4719	9.27241	106
7.06833	7.50422	14.0294	106
7.00424	7.455	24.9014	106
6.94867	7.58723	23.511	106
7.28526	7.77694	24.7192	106
7.27866	7.73271	13.9374	106
7.30297	7.6562	21.6063	106
9.2075	8.93127	22.7134	108
9.17661	8.80414	2.70675	108
9.1188	8.84291	4.37503	108
9.32181	9.09259	38.0299	109
9.17419	8.93075	15.8452	109
9.23323	8.86115	10.0262	109
8.33777	8.52472	42.7312	110
9.22726	8.81247	10.0779	111
9.21612	8.86944	9.16982	111
9.16421	8.93185	8.7508	112
9.12513	8.82158	2.58018	113
9.12215	8.80702	5.12279	113
9.09965	8.78793	5.4919	113
8.05514	7.8978	19.6086	114
7.85056	8.40605	48.853	115
9.18621	8.86201	8.58735	116
6.84319	6.83841	20.9422	117
6.83081	6.71842	7.74132	117
6.80771	6.75656	12.2244	117
9.30751	9.03741	10.888	118
9.20434	8.89794	13.909	118
9.41745	9.13163	9.76742	119
9.43638	9.18461	1.64512	119
7.2915	7.03729	35.6266	120
8.17831	7.57762	12.4224	121
7.22103	7.72394	19.5691	122
7.13096	7.79171	42.5056	122
7.46266	7.60688	34.4047	123
7.44199	7.80397	30.6837	123
7.19792	7.25332	20.695	124
7.14764	7.14524	39.5371	124
8.52112	8.1192	30.732	125
8.66003	8.63062	13.8852	126
8.7459	8.63302	12.2855	126
8.81419	8.65157	59.7008	126
7.2328	7.30477	66.6227	127
6.86117	7.2091	27.9572	127
6.87792	7.36926	56.7515	127
8.43379	7.90325	10.3595	128
8.02768	7.41402	59.8801	130
8.3069	7.7597	17.9004	130
7.248	7.08033	51.8884	131
7.17015	7.36889	49.5866	131
7.2855	7.63018	22.3887	131
9.89844	10.8115	16.4137	132
7.1643	6.90682	20.3015	133
7.23033	7.00333	47.0036	133
8.36802	7.88282	17.0559	134
7.66765	7.54144	49.8499	135
7.72916	7.86716	31.4197	135
7.92635	8.02394	42.839	136
8.16131	8.09931	9.99058	136
8.21692	8.11411	9.88938	136
8.19643	8.06096	36.0604	136
7.16853	7.833	16.5651	137
7.19486	7.92471	38.6838	137
7.39849	7.83425	61.1727	137
7.31788	7.49124	46.4309	137
9.85027	10.3179	10.7698	138
9.83701	10.2573	15.6857	138
9.91921	10.2948	8.95801	138
9.86861	10.3049	41.3458	138
8.28957	8.65378	48.9092	139
8.01379	8.71131	58.9501	139
9.23788	10.0842	20.3078	140
9.22923	9.96996	9.73071	140
9.40868	9.85563	27.6119	142
9.28	9.9491	36.2625	142
7.36684	7.10662	20.1259	143
9.70096	10.6733	43.8446	145
6.94288	7.37072	38.4191	147
7.02265	6.72456	15.0117	148
6.79437	6.73077	34.344	149
7.37243	6.68423	6.67854	150
7.27747	6.55024	52.8801	150
8.63597	8.45989	30.9329	151
8.74807	8.59838	37.4869	151
8.75084	9.62669	17.922	152
8.72549	9.52662	51.4278	152
7.63175	8.19771	14.6947	153
8.19417	8.78728	46.0687	154
8.04256	8.5695	9.09077	154
7.99386	8.55026	31.5035	154
9.42574	9.76168	42.7092	155
9.51026	9.99271	5.57949	155
7.65646	8.03197	46.2751	156
7.47119	7.9914	28.8744	156
7.56654	7.85513	29.9106	156
7.51881	7.62932	24.2286	157
7.42493	7.52606	26.5356	157
9.2108	9.41391	13.0813	158
9.17126	9.34977	64.5004	158
8.79998	9.33636	48.5267	158
7.58819	7.35605	30.8399	159
7.494	7.50666	42.0638	159
7.53155	7.2673	7.61984	159
7.35332	7.0303	26.8492	159
7.4922	7.09834	20.005	159
7.3867	7.22414	4.76843	160
7.14019	7.39766	35.7706	160
7.34667	7.97064	46.2947	161
7.12784	7.81826	44.4075	161
9.06767	8.63536	33.9902	162
8.98025	8.64941	36.1258	162
8.76652	9.81937	61.5171	163
9.38885	10.2204	36.388	164
9.26141	10.054	32.4995	164
9.76172	9.47108	3.7705	165
9.75578	9.49197	9.66859	165
9.54722	10.1873	60.6929	166
9.36829	9.88697	39.3353	166
6.84775	7.19583	41.5905	167
9.1979	9.19089	68.5769	168
9.51231	9.43	35.9923	168
8.99548	9.21867	21.6454	169
9.05615	9.10975	67.5276	169
7.74581	8.35953	21.0521	170
7.70586	8.24504	30.6032	170
7.53982	8.30423	50.6377	170
7.74518	7.22413	20.3087	171
7.78005	7.33579	34.5351	171
8.41023	9.16228	32.9531	172
8.26166	9.04415	13.8453	172
8.32505	8.99576	56.617	172
7.94965	7.59048	66.9671	173
7.56496	7.61879	43.487	173
7.34953	7.74659	64.4822	173
8.35176	8.56387	55.4782	174
7.55752	8.25612	12.4025	174
8.45072	8.48783	51.1581	175
8.70286	8.64033	44.1989	175
8.54408	8.61781	38.5079	175
8.33494	8.69169	38.92	175
6.68579	7.05199	16.8991	176
6.64135	7.16439	6.57799	176
6.67553	7.14804	13.2651	176
9.44297	10.4259	36.7087	177
7.19661	6.80151	2.34106	178
8.94322	9.4198	16.1471	179
9.2811	9.25017	21.3389	180
8.62727	9.55505	9.94624	181
9.501	9.3333	29.7585	182
9.91795	10.5557	10.8946	183
7.01115	7.10018	28.8158	184
9.91442	9.96248	58.1031	185
9.91583	10.2553	16.0744	186
9.75771	9.9377	13.6345	186
9.81373	9.8828	9.32358	186
9.77939	9.92409	8.34622	186
9.82745	9.92526	8.59931	186
9.11777	10.1607	11.1501	188
9.02411	9.2812	29.5674	189
9.24908	9.30536	39.6538	189
9.43735	9.43468	15.51	189
9.39836	9.51506	6.89071	189
9.37604	9.48224	24.6318	189
8.24945	8.25927	19.4986	191
7.60398	8.24146	10.0832	192
7.65675	8.26572	20.5903	192
6.9134	7.26876	15.5097	193
6.96034	7.34477	23.2884	193
7.74989	7.15302	9.70067	193
7.24676	7.62768	45.5936	194
7.35085	7.38657	46.148	194
9.70066	10.9362	8.28799	195
9.65353	10.9286	4.20142	195
9.65573	10.9045	9.14422	195
9.66148	10.8477	9.45048	195
9.69325	10.8896	0.79714	195
9.69164	10.8939	17.3117	195
9.59524	10.9194	11.6166	195
9.66213	10.9177	13.7017	195
9.61793	10.9525	14.1536	195
6.96061	7.1931	30.0401	196
9.57475	9.40949	3.21798	197
9.56439	9.42486	3.11037	197
9.56074	9.4424	5.20493	197
9.48763	9.64708	65.6288	198
9.51843	9.81751	6.84833	198
8.14477	7.73933	24.6626	199
8.15564	7.59769	15.633	199
8.24072	7.5682	15.6719	199
9.89805	9.8729	5.58377	200
9.97331	10.0715	20.6941	200
9.85971	10.0354	10.2062	200
9.92232	10.0707	6.86145	202
8.66107	9.79271	13.1149	203
8.60007	9.83727	10.6476	203
8.63861	9.81215	6.06936	203
8.67024	9.79726	2.37471	203
7.13418	6.99651	56.6705	204
6.87108	7.15462	39.3493	204
7.12551	7.37653	23.693	204
7.1875	7.49811	35.6466	204
7.05376	7.34892	44.8298	204
8.14298	8.06577	11.4997	205
8.50638	8.43777	29.9846	206
9.029	9.54914	30.9394	207
9.01223	9.37172	11.4538	207
9.04493	9.42902	18.5946	207
8.95988	9.36392	8.92557	207
8.99545	9.3268	11.843	207
9.01052	9.39333	4.28743	207
9.01554	9.41751	12.2762	207
8.86851	8.54954	38.9064	208
8.6648	8.64294	19.1246	208
8.9267	8.90532	55.2465	209
8.93233	8.58715	25.1428	209
8.87867	8.83601	69.108	210
8.51458	9.17711	36.482	211
8.36123	9.03344	60.5712	211
8.87617	8.57984	20.3939	212
9.20476	9.27574	22.6973	213
8.80838	8.77582	20.9893	214
8.90826	8.7077	40.6139	214
8.80611	8.82906	7.6054	215
8.84384	8.8068	7.83249	215
8.79876	8.80502	5.89425	215
7.4217	7.52038	16.3398	216
7.39675	7.42963	7.51891	216
9.40565	9.18659	15.7116	217
9.35969	9.10863	16.3979	217
9.40311	9.19251	3.93055	217
7.63603	6.79012	31.7775	218
8.98481	9.02574	22.2125	219
8.90239	9.1236	44.4729	219
8.66896	9.2291	44.7942	219
8.71246	8.2209	51.0415	220
8.9281	8.72039	37.8262	221
9.05329	9.0854	51.4874	221
8.6447	8.49309	9.44238	222
8.69436	8.51527	6.30137	222
8.70474	8.55005	11.9703	222
8.63034	8.61487	18.7775	223
9.31408	9.39174	53.8011	224
9.31573	9.70163	17.1555	224
8.012	8.10698	61.2532	226
7.69323	7.95119	44.7321	227
7.56633	7.72695	30.2778	227
8.69859	9.09925	9.79604	228
8.74672	9.1287	55.3206	228
8.54585	9.37606	56.1069	228
7.31502	7.70271	43.2263	229
8.9234	9.70036	32.3442	231
8.9001	9.8852	11.5301	231
8.92872	9.82527	23.3755	231
8.93514	9.95976	38.4743	231
8.55671	8.88918	21.1617	232
8.44669	8.83671	31.9231	232
8.11128	7.58325	19.2258	233
8.11091	7.69399	5.39213	233
8.66651	8.77873	12.0439	234
8.73339	8.7603	8.99076	234
8.28798	7.6856	11.9097	235
7.18478	6.59213	3.65137	236
7.09425	6.58154	5.54878	236
7.36564	7.60961	20.0131	237
7.48001	7.62403	52.4532	237
7.31151	7.87481	50.3175	237
7.36464	7.59292	8.14957	237
7.32132	7.57484	2.87391	237
7.33787	7.57519	15.7224	237
7.27587	7.6412	6.19245	237
7.30947	7.62923	13.9479	237
6.89383	6.62195	9.99962	238
9.45345	10.507	18.2575	239
9.51454	10.5926	10.1346	239
7.29718	6.7854	9.68948	240
7.30457	6.73008	48.371	240
7.47274	6.95222	22.4792	240
7.38318	6.85871	26.8105	240
10.0355	10.2272	23.727	241
6.80982	6.83713	10.6834	243
6.83336	6.78309	19.6101	243
9.90731	11.058	3.71823	246
7.4955	7.46582	16.5967	247
7.6259	7.45965	28.5786	247
6.9865	6.70203	48.9638	248
6.95141	6.98187	34.3063	248
9.83346	10.1675	10.464	249
9.78542	10.2039	7.28688	249
9.77369	10.1636	13.5866	249
9.88551	10.2842	14.2452	249
9.93426	10.2182	8.97622	249
9.8992	10.2562	21.8471	249
7.92933	7.95455	22.8036	250
10.1572	10.6178	23.6323	251
10.0892	10.6259	9.21265	251
8.02183	8.13256	12.9	252
8.09229	8.10897	13.2277	252
8.06641	8.02592	12.5634	252
8.0759	8.09766	50.5577	252
9.16763	8.88545	26.5426	253
8.9569	8.71524	5.79005	253
9.02375	9.20008	7.40731	254
8.95691	9.19234	44.0336	254
8.1456	7.97508	7.52481	255
8.11057	8.02947	7.2532	255
8.11914	8.07036	16.9276	255
8.12731	7.9732	7.61955	255
8.14899	8.01136	10.6214	255
8.11935	8.06488	7.45745	255
8.0809	8.08403	14.2417	255
7.3851	8.00111	10.9151	256
7.32704	8.02523	20.2847	256
7.44414	7.94791	8.94833	256
7.4896	7.92362	16.4112	256
7.40641	7.96851	12.1222	256
7.35054	8.01039	6.62402	256
7.38397	7.992	2.24673	256
8.00101	7.67156	26.5208	258
8.11034	7.55927	1.37544	258
8.11826	7.55907	8.3545	258
8.1343	7.60444	4.81497	258
8.0088	8.92553	18.3466	259
9.75079	10.6346	23.7131	262
9.89636	10.6102	14.4899	262
9.81484	10.5923	2.81088	262
9.80106	10.6008	10.9663	262
8.94563	9.84256	50.8299	263
9.10872	9.59941	34.1204	263
8.87728	9.39285	32.7	264
8.87809	9.5812	51.7424	264
8.96392	9.29579	60.7558	264
8.31189	9.00041	48.187	265
7.96107	8.2251	29.5939	266
7.33255	6.74849	11.4266	267
7.36075	6.68902	21.5756	267
7.04198	6.80326	67.517	267
6.924	7.17383	39.4221	267
6.95559	7.126	10.9431	267
6.87028	7.41926	48.1311	267
7.92443	7.94664	30.7281	268
7.6244	6.79984	55.5686	269
7.31239	6.72844	19.2771	269
7.72569	8.16403	25.9684	270
8.59144	8.79851	18.9663	273
8.56002	8.69388	4.0204	273
8.2728	8.84323	53.1169	273
8.56229	8.94224	34.7801	273
10.3095	10.4989	8.52782	274
10.3391	10.5381	8.32537	274
10.3354	10.4981	0.944547	274
10.337	10.5033	3.51677	274
10.3198	10.514	5.10995	274
10.3072	10.5406	0.472273	274
10.3094	10.5422	6.73211	274
10.3012	10.5043	4.63529	274
10.3278	10.5066	4.75327	274
8.66752	9.39471	30.3747	275
9.30692	10.0751	5.17661	277
9.30139	10.1044	16.4329	277
9.23983	10.0325	8.98781	277
9.23038	10.0834	23.0217	277
9.34128	10.0107	18.0956	277
8.42998	9.35874	9.10801	278
8.51536	9.31442	7.24394	278
8.88387	9.05212	30.8822	279
8.93124	8.89	42.0243	279
8.8591	8.65894	24.2546	279
8.84155	8.79754	19.1085	279
8.91586	8.73918	7.89995	279
7.94044	8.36451	9.37069	280
7.94288	8.31059	15.0219	280
8.00172	8.37403	6.32166	280
7.32109	7.13759	67.5577	281
7.08783	6.82612	40.2226	281
6.87031	6.90588	8.92373	281
6.87057	6.95728	12.2598	281
6.87804	6.88706	19.6654	281
6.90983	6.99578	15.2868	281
7.43527	6.72784	44.7908	282
7.24803	6.90533	64.986	282
7.62225	6.91396	57.7995	282
9.13437	9.47014	22.8347	283
7.47725	7.18655	31.9064	284
7.29408	7.17158	5.78458	284
8.29283	8.191	30.0263	285
9.79131	10.346	60.5541	286
9.69524	10.0107	56.0438	286
9.75217	10.2918	8.89222	287
8.1992	7.58039	11.2899	289
8.68138	9.51029	18.1644	291
8.59189	9.47276	9.37541	291
8.60433	9.42021	1.10933	291
8.599	9.51962	10.7091	291
8.55984	9.47196	56.3077	291
8.78221	9.70806	28.9272	291
8.66123	9.59349	11.4492	291
8.6401	9.50652	14.5531	292
9.35983	9.1195	50.9308	293
9.07517	9.19042	68.2461	293
8.70256	9.31567	29.4519	293
8.69726	9.14611	24.8068	293
8.75318	9.2776	40.9196	293
8.53479	9.36625	19.085	293
7.89458	7.68874	18.1481	296
7.80336	7.73979	14.8106	296
7.88281	7.77086	21.6942	296
8.31089	7.73832	20.2144	296
10.0563	10.9425	18.0025	298
10.1199	10.8606	2.79993	298
10.0768	10.8779	13.9959	298
7.25363	8.03216	24.4251	299
7.18901	7.90719	15.2131	299
7.46413	7.74298	43.99	301
7.21256	7.77323	16.3852	301
6.97125	7.55948	6.25612	301
8.06977	7.33564	11.0355	302
8.12124	7.37294	5.33533	302
8.84808	8.96512	45.5467	303
10.1696	9.95872	5.73347	305
10.1128	10.0627	13.4055	305
7.80724	7.83754	10.306	307
8.30816	7.83188	34.3641	308
8.12751	7.91278	30.9546	308
8.05741	7.74884	18.6057	308
8.07087	7.85516	50.8056	308
8.15308	7.97412	31.1103	308
8.64021	8.20424	15.4526	309
7.64105	8.16006	16.0528	310
7.54873	8.16522	30.0584	310
7.60481	8.04104	22.4196	310
7.67453	8.44663	25.4023	311
9.28904	9.61032	48.022	312
7.62206	8.32373	6.13566	313
7.62035	8.28843	20.6866	313
7.54297	8.37904	7.75632	313
7.57807	8.3514	4.2822	313
7.58147	8.37583	3.33618	313
7.56244	8.3785	13.6523	313
7.61389	8.43797	19.2517	313
8.43293	8.26639	32.5688	314
6.82275	6.58839	11.8222	315
6.88754	6.60935	10.914	315
6.87679	6.67949	19.8206	315
6.84438	6.57002	16.7388	315
6.79876	6.65496	4.99822	315
6.89144	6.57042	10.0126	315
6.89816	6.6277	16.0761	315
8.46559	8.74556	62.3778	316
8.81925	8.80895	26.4291	316
8.84367	9.81359	11.7027	317
9.08164	8.92461	3.38857	318
9.64393	9.84434	15.6153	319
6.75007	6.97748	5.6675	320
6.78082	6.98844	18.2675	320
6.69992	7.05572	10.6217	320
6.71757	6.99714	8.0468	320
6.7436	7.03549	7.40691	320
7.71329	7.97672	25.0344	321
8.71311	9.75451	3.33584	322
8.36899	9.2662	22.9966	324
8.46136	9.36114	29.9866	324
8.30225	9.29393	7.28848	324
7.90602	8.35077	8.08802	325
7.62888	8.4778	4.48906	325
7.61289	8.49812	10.0348	325
7.46861	7.91096	33.8174	326
8.93317	9.40523	6.01135	328
7.19277	7.28764	20.7102	329
7.30724	7.32121	23.872	329
7.44333	7.30155	19.6194	329
7.56948	7.56966	27.6409	329
7.4261	7.51189	46.4733	329
9.20281	9.97568	33.8887	330
8.39776	9.14471	4.24837	333
8.37569	9.15528	14.4254	333
7.15803	6.95778	14.3069	334
7.16689	6.87585	32.4905	334
7.18946	7.04523	9.78901	334
7.13326	7.04979	44.4037	334
7.12056	7.30524	18.7291	334
7.28282	6.94604	13.9897	335
7.13342	7.21843	33.4438	335
6.94438	7.38763	14.0666	335
8.71261	8.94775	27.1459	337
8.59675	9.05275	27.0743	337
8.57231	9.13441	32.8062	337
8.31858	7.62455	21.5333	338
7.17526	7.25942	54.8558	342
6.9924	7.00174	15.9741	342
9.64133	10.5677	9.25432	343
9.61637	10.6148	10.3888	343
9.58188	10.5659	3.65057	343
9.56872	10.5823	9.0553	343
9.26144	10.0463	3.75952	344
9.32237	10.0626	11.091	344
9.36226	10.0127	13.1601	344
9.39408	10.0815	15.7516	344
9.41854	9.99413	9.22432	344
9.38916	10.0384	2.08022	344
9.38776	10.0265	6.34158	344
9.4152	10.0174	38.1617	344
9.32184	10.2164	32.4853	344
9.42333	10.0592	16.9045	344
9.33913	10.0103	24.4904	344
9.47365	9.96783	39.7454	344
9.58311	10.1689	29.5402	344
9.2747	9.95608	13.293	345
9.34838	9.93525	6.16086	345
9.31791	9.95344	41.9576	345
9.50968	9.8137	8.63768	345
9.53997	9.85317	23.8649	345
9.48215	9.72846	25.2816	345
9.51495	9.58658	11.4863	345
7.05603	6.85771	2.18815	346
7.06643	6.86483	62.5155	346
7.19395	7.09334	40.6454	347
9.69842	9.59977	7.11365	348
9.70895	9.50527	10.4838	348
8.93731	9.84411	22.6305	349
7.56269	7.20363	62.1917	350
8.37359	8.91382	20.2106	351
8.37443	8.79741	22.3812	351
8.35281	8.9245	29.0909	351
7.31896	7.3356	11.7571	352
7.26986	7.28896	16.8121	352
7.19404	7.22872	10.9006	352
7.15714	7.27952	20.0378	352
7.30593	7.14936	14.7336	352
7.24192	7.43187	23.9641	353
8.06804	7.67039	26.1509	354
8.08243	7.52045	21.8613	354
8.00519	7.45202	16.773	354
7.9306	7.61667	43.9666	354
8.30686	8.04391	20.6341	355
8.42859	8.36312	53.418	355
8.29715	8.08492	48.8685	355
7.95802	8.50686	26.955	355
8.12187	8.19203	8.90286	356
9.00322	9.27795	20.3472	357
8.95749	9.38586	10.4893	357
9.00434	9.42401	21.8634	357
8.92151	9.32915	46.0695	357
9.75892	9.63666	10.0401	358
9.73171	9.58563	18.9601	358
10.1446	10.6731	16.6699	359
10.0317	10.7094	19.5483	360
9.73986	10.0239	13.7157	361
9.92198	9.80188	59.6441	361
9.65198	9.58945	41.1103	361
9.33049	8.99759	55.8683	361
8.77996	9.71777	46.3059	362
9.08796	9.97992	8.00125	362
8.53208	8.35485	16.4443	364
8.55191	8.26223	25.9414	364
8.42809	8.0163	8.82558	364
9.08891	9.87895	35.9585	365
6.8869	7.10158	4.98746	366
7.26588	7.9278	4.94987	367
7.19919	7.89074	25.0345	367
7.31836	7.80955	24.7646	367
9.6108	9.97955	17.1443	369
8.4441	8.47937	13.3196	371
8.53669	8.55716	69.1894	371
9.00492	9.01757	45.9821	372
9.05093	9.2784	22.2838	372
7.5214	8.19135	9.76472	373
7.53015	8.13579	10.6329	373
8.40385	8.85336	28.2497	374
9.24762	9.66932	5.39483	375
9.2381	9.63974	13.3912	375
9.26356	9.71255	7.70469	375
9.27013	9.66866	12.8076	375
9.26796	9.59492	7.305	375
7.0035	7.6267	1.89941	376
6.95153	7.68928	10.5807	376
7.41455	8.09938	4.91168	377
7.41637	8.12948	4.33164	377
7.39142	8.12959	11.4386	377
7.4081	8.06585	4.98157	377
9.48399	10.456	11.3823	379
9.42359	10.4305	21.0553	379
9.43731	10.31	26.144	379
7.38721	6.93144	51.3461	380
6.91367	7.66568	13.6592	381
6.88913	6.83928	28.0001	382
7.05347	7.31354	11.5705	383
9.83345	9.71667	15.8073	384
9.79832	9.80067	8.255	384
9.82023	9.75847	1.58743	384
9.8291	9.75625	10.6684	384
9.80334	9.81204	18.1482	384
9.79357	9.71088	13.7151	385
9.74936	9.77635	6.56073	385
9.73946	9.73988	12.1025	385
7.44723	7.80248	16.1498	386
7.3784	7.78757	26.0453	386
9.96026	10.1616	19.828	387
10.0624	10.2127	23.9834	387
10.0135	10.0835	19.5045	387
9.98917	10.1535	11.4453	387
10.0234	10.2085	6.222	387
9.99295	10.2274	11.2612	387
9.98784	10.1872	10.5706	387
10.0484	10.1935	9.84114	387
9.94068	10.1894	9.08602	387
9.28176	9.04208	37.2167	389
9.13674	8.88421	58.7076	389
9.02223	9.65661	9.16774	390
9.05851	9.61824	47.2295	390
9.32283	10.248	9.97555	391
9.30404	10.1937	16.2425	391
7.94717	7.37813	11.2516	392
8.04757	7.35801	15.23	392
7.96666	7.39191	8.73685	392
7.98425	7.34476	17.2016	392
8.03034	7.34233	18.513	393
7.92917	7.37603	8.07494	393
7.19093	6.93133	14.9717	394
7.12436	6.98615	18.6202	394
9.00193	9.24244	35.0586	395
9.36045	9.13422	33.957	397
7.20968	6.83642	23.0675	398
7.51795	6.9655	19.8818	400
7.41417	7.11956	52.9658	400
7.10912	7.11508	17.7148	400
7.00877	7.0966	16.1292	400
9.11548	10.024	3.13491	401
9.13339	10.0263	18.4288	401
9.32737	10.0183	62.0673	401
9.35423	10.1528	50.1501	403
9.09734	10.0207	21.0704	403
9.02883	9.92052	18.5838	403
9.08681	10.0105	15.4243	403
8.87792	9.38549	30.1969	405
9.02216	9.28829	30.6315	405
9.13608	10.1008	63.7316	406
8.07591	8.11428	44.2308	407
9.33227	9.64761	60.8627	408
9.28691	9.86142	56.8234	408
9.06258	9.49701	57.0146	409
8.92625	9.79578	55.1347	409
8.90554	9.47888	15.3333	409
9.81689	10.1347	26.8207	410
9.93203	10.2377	28.6688	410
10.0033	10.465	33.168	410
10.123	10.3161	41.8753	410
7.91598	8.13944	15.0616	411
7.92612	8.2256	14.0403	411
8.65872	8.17924	30.2434	411
8.51142	8.08624	28.3258	411
7.24551	6.72261	22.1614	412
7.25103	6.59508	13.6238	412
6.95706	6.60033	13.0084	412
7.66672	8.29527	5.78632	413
7.70025	8.3698	2.81543	413
7.69848	8.38592	11.5152	413
7.76419	8.39495	17.4332	413
7.79549	8.53785	24.1881	413
8.60705	9.29127	9.21329	414
8.6423	9.33094	2.88227	414
7.72236	8.50953	4.33552	415
7.68422	8.46581	12.0118	416
9.37265	9.26896	16.8591	417
9.77662	10.6315	5.83044	418
9.92376	10.9554	18.2307	418
9.97732	10.7624	63.6496	418
10.0428	10.7447	12.4343	419
8.09853	9.06515	9.58103	420
8.16298	9.02558	10.9312	420
8.13534	9.03369	10.9983	420
8.19681	9.01837	6.03036	420
8.19816	9.09813	7.35463	420
8.15605	9.10275	8.48096	420
8.20436	8.45945	0.842148	421
8.20906	8.45825	19.4279	421
8.32014	8.47181	10.2454	421
8.30909	8.52978	19.9595	421
8.20982	8.47179	15.0274	421
8.26208	8.40817	4.39116	421
8.19657	8.49637	12.054	421
7.75819	8.69689	8.37842	422
7.80567	8.70553	5.76798	422
7.77862	8.68624	11.4211	422
7.71591	8.66636	10.1922	422
7.74518	8.71725	13.6868	422
7.77201	8.64312	5.74699	422
7.77625	8.67595	7.05653	422
9.43132	10.4793	9.8518	423
9.09257	9.25214	22.3333	424
9.37117	9.51456	35.2255	425
9.39675	9.71584	38.7024	425
9.59982	9.62387	3.09634	425
9.60305	9.64141	15.3741	425
9.51499	9.65076	27.1638	425
8.06689	8.88538	54.2502	426
8.36861	8.96668	62.8398	426
8.44562	9.32035	23.7999	426
8.47682	9.18686	41.4473	426
8.69674	9.27976	50.0977	426
8.67464	8.99513	33.9725	427
8.15039	8.32623	65.3117	428
8.42614	8.07033	41.0666	428
8.51707	8.1054	14.6684	430
8.59206	8.07072	17.232	430
9.04601	9.22503	7.80757	431
9.0585	9.37178	16.4442	433
9.00721	9.29215	22.4369	433
9.13641	9.28908	19.0075	433
8.96651	9.24774	15.3712	433
8.50832	8.52082	35.8542	435
8.32378	8.36062	9.19933	435
7.81839	7.44287	27.8369	436
9.02208	9.5541	11.8724	438
9.19692	9.72139	24.2044	438
10.0591	10.9154	7.43903	439
10.144	11.0132	24.5975	439
10.0336	10.9244	19.375	439
7.22433	7.78468	27.5979	440
10.1423	10.9545	9.34154	441
10.0826	10.9397	16.973	441
9.97149	10.8525	13.8701	441
10.051	10.8603	24.7294	441
9.95585	10.7543	21.1186	441
10.0196	10.8579	13.569	441
10.0165	10.911	0.628846	441
10.0129	10.9106	7.50715	441
9.97472	10.8903	21.6331	441
9.96838	10.9209	5.94919	441
7.90966	8.01038	21.7285	442
8.25597	8.7286	42.4299	444
6.75167	7.01794	3.25535	447
6.76552	7.0053	19.194	447
8.02418	8.68091	11.2289	449
7.96324	8.70258	12.1872	449
8.0651	8.40266	28.8124	449
7.91427	8.33343	30.5479	449
8.28201	8.63004	9.46604	450
8.43385	8.64568	51.8102	450
8.72674	8.58846	31.5658	450
10.1303	10.2588	3.9957	451
9.98318	10.2474	41.1368	451
9.7466	10.2342	12.7403	451
9.8087	10.1951	22.7257	451
10.0984	10.1377	35.611	451
9.94592	10.2749	31.9467	451
8.01928	8.81953	5.6351	452
8.05155	8.82302	9.73798	452
9.38149	10.309	21.7141	453
9.46987	10.2205	13.7652	453
9.47359	10.2997	25.2451	453
7.58782	7.966	29.359	454
7.46957	8.08689	12.4099	454
7.53972	8.07316	14.8969	454
9.7801	10.6112	55.281	455
9.42869	9.75283	27.9161	457
8.42597	9.17308	14.9388	458
8.38983	9.09499	19.9651	458
8.44014	9.1984	24.0266	458
8.40744	8.84098	11.8058	458
8.30524	8.85833	5.1345	458
7.99108	8.79646	10.5927	458
8.04925	8.81487	3.94855	458
7.14665	7.05847	17.747	459
8.60615	8.62188	29.4308	460
8.72836	8.74466	7.09976	460
7.01301	6.75516	31.0281	461
7.1912	6.74138	17.1358	461
7.26733	6.8042	39.5716	461
7.61416	6.85237	45.9417	461
9.10405	9.60872	10.6725	462
8.87536	9.63187	3.68945	462
8.6856	9.69187	22.2932	462
8.66559	9.56503	69.1434	462
8.82143	9.19852	51.5067	462
9.5239	10.3518	3.84495	464
8.77354	8.93271	36.2234	467
8.27503	8.64506	41.1811	468
8.22266	8.87641	8.2522	468
8.26782	8.86158	48.4222	468
8.48934	7.93526	1.71125	469
8.49125	7.92559	7.64844	469
8.4728	7.88592	4.0131	469
8.47408	7.86284	3.82434	469
8.48827	7.87967	11.7682	469
7.34691	7.96319	18.5692	470
7.2521	8.0127	7.50742	470
7.29152	7.94905	11.0279	470
7.29178	8.01257	12.0413	470
7.26832	7.9473	1.85229	470
9.93524	10.7286	31.1361	471
9.33699	10.6334	14.8052	473
9.36451	10.5675	8.97652	474
9.5805	10.6851	6.69214	475
9.79465	10.8717	6.11588	475
9.76941	10.9317	0.894771	475
9.4833	10.7017	2.34478	476
9.4704	10.6977	14.4331	476
9.48777	10.6164	4.34036	476
10.0922	10.6842	11.942	477
10.0346	10.7218	17.6425	477
10.0086	10.7905	44.6203	477
9.7535	10.7592	4.6689	477
7.36167	8.03297	20.1765	478
7.30271	8.13312	27.6411	478
8.94417	8.77386	16.6464	481
8.85015	8.75505	2.34402	481
8.83678	8.75693	33.5765	481
9.0136	8.99966	6.3987	481
9.00205	8.96466	28.7267	481
9.33417	9.45934	11.9326	481
8.16423	8.4851	12.863	482
7.99978	7.77877	5.64494	483
9.79895	10.8897	9.02882	484
9.83016	10.9313	5.60265	484
9.07829	9.40961	47.0736	486
9.34931	9.4178	66.2635	486
8.72491	9.03775	54.1283	487
6.80588	7.44246	5.91572	489
6.85575	7.43841	46.456	489
6.80922	7.38733	2.95097	489
6.82313	7.34828	9.37311	489
6.73009	7.35188	26.1268	489
6.81221	7.47799	11.58	489
6.87984	7.41564	16.7805	489
6.78583	7.4381	2.98126	489
6.78971	7.43762	12.2159	489
6.85998	7.43399	14.9913	489
6.7962	7.4922	23.3769	489
7.99235	8.08199	11.7764	490
7.84677	8.0857	29.6037	490
6.9015	7.43212	16.1891	491
6.80839	7.43721	8.80409	491
7.92604	7.59046	57.5995	492
7.86368	7.67685	32.9349	492
7.77124	7.53205	28.8575	493
7.60503	7.5303	10.1077	493
8.97005	9.26965	10.8	494
7.87422	7.78434	31.7835	496
7.71746	7.35101	10.2626	496
6.84736	6.80184	25.0751	497
7.246	6.78271	26.595	498
7.27483	6.93316	41.3341	498
7.88074	7.35758	8.57664	499
7.91312	7.39489	9.57839	499
7.91098	7.33976	2.69495	499
7.83601	7.55169	16.5904	499
7.9312	7.5601	32.1977	499
10.1471	10.9994	13.6628	500
10.0688	10.9915	17.3027	500
9.97222	10.9669	17.6985	500
7.95181	8.10873	49.4247	501
8.35159	8.36475	54.866	501
8.19998	8.85542	6.53344	501
8.16544	8.84048	27.7172	501
7.97723	8.91753	7.05352	501
8.5601	8.50676	53.3975	502
8.43534	8.78789	28.0762	502
8.59031	8.83412	51.1871	502
9.34615	10.252	9.96732	503
9.32681	10.2537	12.8219	503
9.34371	10.368	17.6413	503
9.27365	10.2944	13.4501	503
9.8584	10.8216	10.3386	504
9.86085	10.7621	37.5057	504
9.75972	10.953	34.1771	504
9.79257	10.7589	13.2809	504
9.84615	10.7043	18.1897	504
9.2751	10.3017	13.9493	505
7.07324	7.17575	22.2537	506
9.79061	10.812	27.4213	507
9.67517	10.9198	14.7015	507
9.36646	10.3529	1.83635	508
9.35594	10.354	6.90902	508
9.35689	10.3971	36.6565	508
9.1728	10.2937	23.2729	508
9.24752	10.3521	7.91606	508
7.38528	7.16489	25.5556	509
7.52839	7.13043	18.3423	509
8.02774	8.1898	51.3831	511
8.30811	8.09499	9.04409	511
8.45359	8.04947	31.426	511
8.26954	8.06813	30.1904	511
9.1659	9.37366	55.6036	512
9.39986	9.4121	63.3085	512
9.37071	9.77559	30.9155	512
9.22226	9.67724	53.7377	512
8.65298	9.49084	11.5747	513
8.68869	9.43454	9.13953	513
8.63771	9.44767	45.0578	513
7.46555	8.31589	12.996	514
8.18125	8.62138	37.7402	515
9.51838	10.7312	30.7402	516
9.69114	10.77	30.9064	516
9.56916	10.1698	21.489	517
9.59829	10.0495	44.0743	517
8.20552	8.83649	16.3091	518
8.46146	9.39591	17.0371	520
8.37527	9.34899	20.4492	520
7.9907	8.42819	16.6669	521
7.89618	8.41139	43.2882	521
8.14549	8.40753	39.631	521
8.18263	8.19023	67.8403	521
8.30324	8.14359	48.3769	521
8.14071	8.13434	3.40675	521
8.54597	9.57044	54.7263	522
8.48459	9.26125	58.0604	522
9.02237	9.19395	53.804	522
7.8152	8.26218	13.4108	523
7.87592	8.21443	16.9302	523
7.90287	8.12071	34.7687	523
8.25671	9.22	23.2848	524
8.32897	9.10701	29.3243	524
7.05406	6.77796	12.2058	525
7.12431	6.77517	7.86063	525
7.07925	6.7796	13.2207	525
7.10261	6.85208	29.3806	525
7.91072	8.49685	7.7927	526
7.90165	8.45289	22.0034	526
7.77804	8.4249	34.6012	526
8.7788	8.82336	11.3995	527
8.96006	9.02745	30.4899	527
9.12258	9.09401	25.0632	527
9.21823	9.20214	11.1402	527
9.25725	9.1512	57.9003	527
8.99697	9.31644	36.6201	528
8.91837	9.1207	7.53323	528
8.89431	9.08459	14.0663	528
8.66591	9.12016	17.7257	529
8.74272	8.50808	12.3913	530

## Sheet: 1c_d
Repeats	Enrichment on Cytoplasm	Enrichment on Membrane	Enrichment on Nucleus	Speed on Cytoplasm (µm/s)	Speed on Membrane (µm/s)	Speed on Nucleus (µm/s)	num of cells	num of traces
R1	1.01093	0.98433	0.99938	24.4629	21.5779	25.151	83	15095
R2	1.13113	0.98393	0.94242	25.4205	23.0549	26.3874	74	23988
Average	1.07103	0.98413	0.9709	24.9417	22.3164	25.7692
Standard deviation	0.0601	0.0002	0.02848	0.4788	0.738515	0.618235
