# Supplementary material for: Dynamic interactions between the RNA chaperone Hfq, small regulatory RNAs, and mRNAs in live bacterial cells
Source: eLife. 2021 Feb 22;10:e64207. doi: 10.7554/eLife.64207 (PMC7987339; doi:10.7554/eLife.64207)
Supplement: Figure 2—figure supplement 1—source data 1. [file elife-64207-fig2-figsupp1-data1.xlsx]

## Sheet: panel b
	Repeats	Time=0 s	Time 0.00576 s	Time 0.01152 s	Time 0.01728 s	Time 0.02304 s	num of cells	num of traces
mMaple3_NT	R1	0	0.0412523	0.0802585	0.113827	0.144939	84	1756
	R2	0	0.0436727	0.0828443	0.114792	0.144682	94	13211
	Average	0	0.0424625	0.0815514	0.11431	0.144811
	standard deviation	0	0.00121018	0.0012929	0.00048261	0.00012892
mMaple3_Rif	R1	0	0.0410638	0.0798972	0.11166	0.143301	40	488
	R2	0	0.0446343	0.0850615	0.119629	0.149436	62	2332
	Average	0	0.0428491	0.0824794	0.115645	0.146369
	standard deviation	0	0.00178527	0.00258215	0.00398471	0.00306754
sAB-70-mMaple3_NT	R1	0	0.0119984	0.0240869	0.0359323	0.0470137	134	546
	R2	0	0.0157621	0.0306119	0.0440794	0.0576004	128	530
	Average	0	0.0138803	0.0273494	0.0400058	0.0523071
	standard deviation	0	0.00188181	0.00326254	0.00407352	0.00529332
sAB-70-mMaple3_Rif	R1	0	0.0143739	0.0275127	0.0399252	0.050791	96	227
	R2	0	0.0125132	0.0250029	0.0368135	0.0480131	126	365
	Average	0	0.0134436	0.0262578	0.0383694	0.049402
	standard deviation	0	0.000930359	0.0012549	0.00155582	0.00138894
scFv-GCN4-mMaple3_NT	R1	0	0.0132448	0.0262113	0.0397167	0.0505047	84	325
	R2	0	0.0153832	0.0302427	0.0433017	0.0539782	51	246
	Average	0	0.014314	0.028227	0.0415092	0.0522415
	standard deviation	0	0.00106919	0.00201572	0.00179247	0.00173673
scFv-GCN4-mMaple3_Rif	R1	0	0.0132508	0.0269768	0.0393471	0.0497173	90	157
	R2	0	0.0128082	0.02532	0.0373808	0.0490909	85	153
	Average	0	0.0130295	0.0261484	0.038364	0.0494041
	standard deviation	0	0.000221313	0.000828449	0.000983166	0.000313173

## Sheet: panel c
	Treatment	Repeats	D (um^2/s)	Average	standard deviation	num of cells	num of traces
mMaple3	NT	R1	6.49889	6.52625	0.0387	84	1756
		R2	6.55362			94	13211
	Rif	R1	6.41807	6.59848	0.255131	40	488
		R2	6.77888			62	2332
sAB-70-mMaple3	NT	R1	2.06032	2.30222	0.342105	134	546
		R2	2.54413			128	530
	Rif	R1	2.27048	2.19141	0.111822	96	227
		R2	2.11234			126	365
scFv-GCN4-mMaple3	NT	R1	2.23864	2.33948	0.142602	84	325
		R2	2.44031			51	246
	Rif	R1	2.22289	2.1877	0.0497662	90	157
		R2	2.15251			85	153
