# Supplementary material for: Dynamic interactions between the RNA chaperone Hfq, small regulatory RNAs, and mRNAs in live bacterial cells
Source: eLife. 2021 Feb 22;10:e64207. doi: 10.7554/eLife.64207 (PMC7987339; doi:10.7554/eLife.64207)
Supplement: Figure 2—figure supplement 2—source data 1. [file elife-64207-fig2-figsupp2-data1.xlsx]

## Sheet: panel a
osd2 (µm2)	CDF (combining all data)	Residue (Single Population)	Residue (Double Population)	Residue (Triple Population)
-0.0015	0	0.0356798	0.0668129	0.0657708
0.0015	0.09235	0.0578994	0.0361831	0.036707
0.0045	0.16647	0.0666379	0.0205697	0.0213023
0.0075	0.2293	0.0685137	0.0135454	0.0140298
0.0105	0.28327	0.0656569	0.00997632	0.0101329
0.0135	0.33059	0.0599981	0.00776422	0.00765174
0.0165	0.37403	0.0540468	0.00719896	0.00691121
0.0195	0.41221	0.0461799	0.00544845	0.00507424
0.0225	0.44799	0.0390311	0.00450035	0.00411108
0.0255	0.48024	0.0312591	0.00268059	0.00232919
0.0285	0.5099	0.0236073	0.000572367	0.000296068
0.0315	0.53857	0.0174919	-0.000473111	-0.000649204
0.0345	0.56489	0.0113821	-0.00200117	-0.00206093
0.0375	0.58906	0.00531817	-0.00395881	-0.00389261
0.0405	0.61177	-0.00015846	-0.00577898	-0.00558183
0.0435	0.63363	-0.00457645	-0.0069587	-0.00662895
0.0465	0.65443	-0.00827505	-0.00780376	-0.00734216
0.0495	0.67382	-0.0117247	-0.00875154	-0.00816059
0.0525	0.6927	-0.0141379	-0.00898263	-0.00826612
0.0555	0.70993	-0.0167591	-0.00971194	-0.00887459
0.0585	0.72575	-0.0194462	-0.0107694	-0.00981664
0.0615	0.74137	-0.02108	-0.0110105	-0.00994823
0.0645	0.75552	-0.0230156	-0.0117665	-0.0106011
0.0675	0.76898	-0.0245519	-0.0123152	-0.011053
0.0705	0.78221	-0.0253027	-0.0122505	-0.0108983
0.0735	0.79496	-0.0255869	-0.0118732	-0.0104378
0.0765	0.80753	-0.0251684	-0.0109312	-0.00941915
0.0795	0.81904	-0.0249871	-0.0103491	-0.00876723
0.0825	0.83029	-0.0242987	-0.00936927	-0.00772406
0.0855	0.84133	-0.0231051	-0.00798118	-0.00627911
0.0885	0.85212	-0.0214948	-0.00626208	-0.00450942
0.0915	0.86153	-0.0206429	-0.00537694	-0.0035798
0.0945	0.87027	-0.0198815	-0.00464864	-0.00281289
0.0975	0.8791	-0.0184898	-0.00334807	-0.00147935
0.1005	0.8875	-0.0170244	-0.00202425	-0.000127993
0.1035	0.89541	-0.0155795	-0.00076447	0.00115416
0.1065	0.90315	-0.0138668	0.000725626	0.00266171
0.1095	0.91093	-0.0117059	0.00263194	0.00458082
0.1125	0.91822	-0.00965459	0.00440183	0.0063591
0.1155	0.92501	-0.00774851	0.00600401	0.00796553
0.1185	0.93136	-0.00595172	0.00747848	0.00944035
0.1215	0.93781	-0.00374661	0.00934644	0.011305
0.1245	0.94408	-0.00143407	0.0113102	0.0132621
0.1275	0.95044	0.00123646	0.0136232	0.0155652
0.1305	0.9564	0.00375681	0.0157798	0.0177091
0.1335	0.96151	0.00566008	0.0173154	0.0192292
0.1365	0.96675	0.00791049	0.0191961	0.0210919
0.1395	0.97211	0.0104833	0.0213991	0.0232747
0.1425	0.97705	0.0128249	0.023372	0.0252254
0.1455	0.9816	0.0149524	0.0251336	0.0269628
0.1485	0.98613	0.017224	0.0270431	0.0288464
0.1515	0.9904	0.0193885	0.0288503	0.0306262
0.1545	0.99483	0.0218556	0.0309657	0.0327129
0.1575	0.99895	0.0241455	0.0329105	0.0346278
0.1605	1	0.0234894	0.0319162	0.0336025

## Sheet: panel b
	CDF
osd2 (µm2)	WT NT (combining all data)	WT Rif (combining all data)	Y25D NT (combining all data)	Y25D Rif (combining all data)
-0.0015	0	0	0	0
0.0015	0.24675	0.09235	0.12818	0.08695
0.0045	0.39068	0.16647	0.22076	0.15739
0.0075	0.48783	0.2293	0.29288	0.21614
0.0105	0.55685	0.28327	0.35065	0.26607
0.0135	0.61035	0.33059	0.39981	0.31183
0.0165	0.65173	0.37403	0.44396	0.35324
0.0195	0.68583	0.41221	0.48302	0.39059
0.0225	0.71358	0.44799	0.51836	0.42531
0.0255	0.73836	0.48024	0.55068	0.45695
0.0285	0.75991	0.5099	0.58017	0.48728
0.0315	0.77852	0.53857	0.60699	0.51472
0.0345	0.79532	0.56489	0.63126	0.54127
0.0375	0.80978	0.58906	0.65369	0.56531
0.0405	0.82387	0.61177	0.67568	0.58877
0.0435	0.83623	0.63363	0.69551	0.60983
0.0465	0.84714	0.65443	0.71361	0.63025
0.0495	0.85799	0.67382	0.73067	0.64934
0.0525	0.86755	0.6927	0.74707	0.66801
0.0555	0.87631	0.70993	0.76232	0.68605
0.0585	0.88426	0.72575	0.77715	0.70267
0.0615	0.89201	0.74137	0.79097	0.71863
0.0645	0.89907	0.75552	0.80337	0.73399
0.0675	0.90568	0.76898	0.81554	0.74822
0.0705	0.91158	0.78221	0.82697	0.76225
0.0735	0.91761	0.79496	0.83787	0.77581
0.0765	0.92301	0.80753	0.84807	0.78778
0.0795	0.92806	0.81904	0.85768	0.80003
0.0825	0.93288	0.83029	0.86652	0.81154
0.0855	0.93729	0.84133	0.87548	0.82306
0.0885	0.94144	0.85212	0.88344	0.834
0.0915	0.94565	0.86153	0.89141	0.84435
0.0945	0.9496	0.87027	0.89872	0.85402
0.0975	0.95311	0.8791	0.90628	0.86375
0.1005	0.95646	0.8875	0.91279	0.87155
0.1035	0.95982	0.89541	0.91945	0.88065
0.1065	0.9629	0.90315	0.92566	0.88889
0.1095	0.96583	0.91093	0.93137	0.89717
0.1125	0.96868	0.91822	0.93684	0.90523
0.1155	0.97141	0.92501	0.94236	0.91325
0.1185	0.97404	0.93136	0.94734	0.92067
0.1215	0.97651	0.93781	0.95208	0.92774
0.1245	0.97908	0.94408	0.95667	0.93466
0.1275	0.98147	0.95044	0.961	0.94129
0.1305	0.98363	0.9564	0.96553	0.94756
0.1335	0.98563	0.96151	0.96967	0.95393
0.1365	0.98766	0.96675	0.97402	0.96015
0.1395	0.98934	0.97211	0.97778	0.96598
0.1425	0.99109	0.97705	0.98141	0.97157
0.1455	0.99287	0.9816	0.98508	0.9771
0.1485	0.99451	0.98613	0.98868	0.98246
0.1515	0.99623	0.9904	0.99196	0.98782
0.1545	0.99781	0.99483	0.99528	0.99306
0.1575	0.99949	0.99895	0.99848	0.99773
0.1605	1	1	1	1

## Sheet: panel c
osd2 raw data after combing all repeats (µm2)						PDF							osd2 indicated as dotted lines (µm/s)
WT NT	WT Rif	Y25D NT	Y25 Rif		osd2 (µm2)	WT NT	WT Rif	Y25D NT	Y25 Rif			Fast osd2 rom all Rif cases	0.0507
0.10388	0.07064	0.00711	0.0336		-0.0015	0	0	0	0			Slow osd2 from replicates of WT Rif	0.0051
0.01931	0.03027	0.05277	0.114		0.0015	0.246753	0.0923503	0.128184	0.086955			Slow osd2 from replicates of Y25D Rif	0.0048
0.04697	0.08716	0.05391	0.0494		0.0045	0.14393	0.074119	0.0925779	0.0704399			Slow osd2 from replicates of WT NT	0.0063
0.04807	0.0343	0.0034	0.00951		0.0075	0.0971439	0.0628351	0.0721159	0.0587467			Slow osd2 from replicates of Y25D NT	0.0059
0.000310052	0.12561	0.13439	0.0046		0.0105	0.0690251	0.0539666	0.0577754	0.0499242
0.00516	0.01316	0.01871	0.008		0.0135	0.0534943	0.0473175	0.0491586	0.0457621
0.03708	0.0569	0.02604	0.0685		0.0165	0.0413801	0.0434381	0.0441523	0.0414105
0.01195	0.03558	0.0012	0.103		0.0195	0.0341042	0.0381785	0.0390602	0.0373466
0.10058	0.03829	0.03036	0.0563		0.0225	0.0277509	0.0357819	0.0353327	0.0347287
0.00806	0.00514	0.00707	0.00665		0.0255	0.024777	0.0322569	0.0323227	0.0316404
0.02622	0.06137	0.00889	0.0123		0.0285	0.0215473	0.0296551	0.029492	0.0303279
0.0031	0.00825	0.03496	0.143		0.0315	0.0186108	0.0286665	0.0268173	0.0274362
0.01191	0.00437	0.01554	0.0128		0.0345	0.0168027	0.0263259	0.0242752	0.0265518
0.02525	0.00558	0.0021	0.00119		0.0375	0.0144647	0.0241717	0.022427	0.0240391
0.03787	0.01758	0.01875	0.051		0.0405	0.0140843	0.0227076	0.0219904	0.0234636
0.00158	0.00899	0.01283	0.0727		0.0435	0.0123573	0.0218589	0.0198303	0.0210562
0.02508	0.06651	0.11188	0.0482		0.0465	0.0109108	0.0208052	0.0180992	0.0204175
0.00941	0.01147	0.02743	0.0572		0.0495	0.0108547	0.0193877	0.017062	0.0190909
0.04881	0.01674	0.14512	0.0127		0.0525	0.00955789	0.0188748	0.0163992	0.0186768
8.64049e-05	0.05292	0.00439	0.0363		0.0555	0.00876608	0.0172335	0.0152529	0.0180311
0.03893	0.03951	0.03336	0.00994		0.0585	0.00794932	0.015816	0.014824	0.0166203
0.01268	0.00756	0.00121	0.0345		0.0615	0.00774358	0.0156202	0.0138181	0.0159676
7.82681e-05	0.00594	0.05292	0.0871		0.0645	0.00706399	0.0141561	0.0124066	0.015357
0.00011866	0.02411	0.00139	0.00601		0.0675	0.00660885	0.0134567	0.0121649	0.014227
0.00201	0.05053	0.000801886	0.0311		0.0705	0.00590432	0.0132329	0.0114319	0.0140304
0.00492	0.01328	0.00025108	0.126		0.0735	0.00602902	0.0127479	0.0109016	0.0135602
0.00388	0.03093	0.04539	0.0738		0.0765	0.00539931	0.0125708	0.0101998	0.0119739
0.01644	0.000225806	0.14996	0.0613		0.0795	0.00504392	0.0115077	0.00960714	0.0122477
0.05444	0.00923	0.00735	0.0408		0.0825	0.00482571	0.0112465	0.00884293	0.0115107
0.03857	1.8125e-06	0.000708155	0.00048		0.0855	0.00440798	0.0110414	0.0089599	0.0115177
0.01981	0.000220264	0.00519	0.0431		0.0885	0.00414612	0.0107896	0.00796176	0.0109422
0.000772583	0.02704	0.00541	0.045		0.0915	0.00420847	0.00940942	0.00796956	0.0103526
0.000137219	0.00988	0.00363	0.0468		0.0945	0.00395908	0.00874731	0.00730673	0.0096718
0.000512797	0.00789	0.00325	0.00756		0.0975	0.00350394	0.00883124	0.00756406	0.00972094
0.01546	0.000305646	0.00261	0.03		0.1005	0.00334807	0.00839294	0.00651133	0.00780482
0.00695	0.02029	0.00465	0.147		0.1035	0.00336054	0.00790801	0.00665169	0.00909627
0.01427	0.02587	0.01013	0.0395		0.1065	0.00307997	0.00774948	0.00621501	0.008247
0.00987	0.00611	0.0208	0.137		0.1095	0.00293657	0.00777746	0.00570814	0.00827508
0.00534	0.06232	0.02006	0.153		0.1125	0.00284929	0.00729253	0.0054664	0.00806452
0.000652113	0.04663	0.03679	0.0875		0.1155	0.00273083	0.00678895	0.00552878	0.00801539
0.000345681	0.07604	0.00251	0.0864		0.1185	0.00262484	0.00634133	0.00497512	0.00741879
0.000160749	0.05812	0.000305179	0.0906		0.1215	0.0024752	0.00645324	0.00474118	0.00706786
9.08881e-05	0.00733	0.000421594	0.0601		0.1245	0.00256872	0.00626673	0.00458522	0.00692046
0.000195779	0.10786	0.00138	0.129		0.1275	0.00238791	0.00635998	0.00433569	0.0066327
7.45961e-05	0.04182	0.00734	0.0512		0.1305	0.00216346	0.00596831	0.00453064	0.00627474
0.000486414	0.06945	0.03793	0.0866		0.1335	0.00199512	0.00511037	0.00414074	0.00636598
0.000177366	0.00515	0.05323	0.087		0.1365	0.0020263	0.00524092	0.00435128	0.00622561
0.000300882	0.09076	0.00866	0.0414		0.1395	0.00168339	0.00535283	0.00375864	0.00582554
0.000496378	0.01358	0.0605	0.0482		0.1425	0.00175197	0.00494251	0.00362607	0.00558691
0.000528596	0.01954	0.01268	0.0104		0.1455	0.00177691	0.00455084	0.00367286	0.00553076
0.000417215	0.01364	0.01591	0.0108		0.1485	0.00163974	0.00453219	0.00359488	0.00536231
0.000181096	0.01485	0.05279	0.0312		0.1515	0.00172079	0.00427107	0.00328296	0.00535529
0.000848147	0.01148	0.0388	0.043		0.1545	0.0015774	0.00442961	0.00332195	0.00524299
0.000220714	0.02978	0.00829	0.0526		0.1575	0.00168962	0.00411254	0.00319718	0.00466745
1.4164e-06	0.00045216	0.0509	0.0589		0.1605	0.000505016	0.00105378	0.00152061	0.00227407
0.00029472	0.02523	0.08158	0.0088
0.000359283	0.13152	0.04671	0.0248
0.01155	0.09543	0.03879	0.136
0.00488	0.01982	0.00456	0.0537
0.000296	0.00201	0.00978	0.0584
0.00153	0.10863	0.0224	7.03e-05
0.01032	0.01063	0.01604	0.0252
0.01293	0.00175	0.03038	0.014
0.02007	0.10584	0.01529	0.00103
0.0277	0.000518039	0.0053	0.0089
0.01972	0.01475	0.00317	0.0463
0.0033	0.00752	0.00593	0.101
0.00147	0.0625	0.07909	0.0859
0.000615875	0.02062	0.1333	0.051
0.09887	0.02868	0.02639	0.0616
0.0329	0.02018	0.00778	0.0163
0.0467	0.03018	0.00072994	0.0218
0.0004537	0.03738	0.00030056	0.00462
0.00288	0.00706	0.02478	0.152
0.00088513	0.01052	0.02274	0.102
0.07657	0.01423	0.07222	0.0275
0.04338	0.02113	0.00432	0.0441
0.00439	0.02558	0.02755	0.0561
0.09098	0.00145	0.02111	0.00478
0.02635	0.000806704	0.00806	0.0845
0.07298	0.0029	0.04073	0.0667
0.02653	0.05262	0.00798	0.0153
0.00794	0.07113	0.03807	0.0469
0.15484	0.06695	0.04837	0.0525
0.03291	0.00142	0.00045461	0.0212
0.01835	0.00607	0.0142	0.0858
0.00808	0.04393	0.00482	0.0481
0.00304	0.00103	0.00221	0.00109
0.05066	0.01648	0.00035906	0.0241
0.00908	0.00524	0.02013	0.00273
0.00225	0.01325	0.14239	0.03
0.00588	0.00421	0.0577	0.0655
0.00153	0.00674	0.00407	0.0519
0.01437	0.00632	0.03702	0.0377
0.00223	0.00129	0.01736	0.0772
0.00057811	0.00124	0.00897	0.000568
0.00126	0.02366	0.14666	0.0218
9.98629e-05	0.02045	0.02097	0.0383
0.00359	0.02507	0.00211	0.0999
0.00592	0.09006	0.00098345	0.000993
0.00588	0.11331	0.00836	0.0143
0.006	0.01756	0.06045	0.0155
0.000813079	0.05128	0.01416	0.0162
0.000237475	0.09737	0.03625	0.0953
0.000588943	0.00446	0.04782	0.0441
0.00757	0.00010942	0.01271	0.0617
0.01086	0.04051	0.00144	0.0136
0.00855	0.00266	0.00411	0.00907
0.00416	0.00981	0.01303	0.142
0.01935	0.02464	0.01373	0.0488
0.03011	0.09242	0.05346	0.0691
0.00479	0.03434	0.02053	0.0115
0.024	0.10501	0.10612	0.0341
0.04065	0.11573	0.00138	0.015
0.01041	0.01428	0.00626	0.00156
0.00546	0.15469	0.02243	0.00771
0.000938643	0.03127	0.1262	0.0261
0.00805	0.09616	0.07793	0.0111
0.00769	0.00633	0.0516	0.0126
0.00412	0.02517	0.00099125	0.0108
0.00327	0.02898	0.00769	0.0235
0.00484	0.06155	0.102	0.0606
0.000523012	0.00115	0.09286	0.00329
0.00599	0.03954	0.00538	0.0288
0.00477	0.01199	0.12992	0.026
0.000516192	0.09049	0.00628	0.067
0.0157	0.00271	0.00175	0.0147
0.00805	0.02122	0.00468	0.0122
0.01298	0.00173	0.00189	0.00605
0.000566088	0.0425	0.03132	0.0412
0.00963	0.01084	0.00139	0.0283
0.05602	0.02568	0.01486	0.0593
0.05527	0.01646	0.00304	0.0406
0.03235	0.04446	0.02903	0.0653
0.0098	0.000802605	0.0621	0.0746
0.03104	0.0238	0.00371	0.0284
0.01455	0.01465	0.07351	0.00717
0.000142542	0.04374	0.01564	0.105
0.13694	0.02684	0.03082	0.00818
0.07938	0.04278	0.01701	0.0286
0.00526	0.11781	0.00642	0.0245
0.03369	0.06281	0.01562	0.0154
0.02203	0.00636	0.04891	0.000796
0.01713	0.01281	0.000301065	0.0148
0.00243	0.09212	0.01195	0.0147
0.000177175	0.00292	0.00474	0.000642
0.000237645	0.03024	0.000957293	0.0339
0.00229	0.04254	0.000953852	0.00311
0.00572	0.0916	0.00151	0.0119
0.000237678	0.01465	0.00307	0.0023
0.01124	0.01007	0.0062	0.00485
0.0046	0.11176	0.00678	0.000357
0.0007577	0.02502	0.00116	0.0171
0.01637	0.07364	0.000496944	0.0129
0.0009807	0.000219024	0.01603	0.154
0.00458	0.000744495	0.0052	0.117
0.00201	0.01206	0.02161	0.0295
0.0022	0.00335	0.02503	0.0632
0.00367	0.04129	0.01148	0.0577
0.00984	0.00245	0.004	0.0801
0.01144	0.00384	0.00352	0.0784
0.04314	0.00177	0.0074	0.0351
0.01864	0.00774	0.00572	0.00787
0.05007	0.01776	0.01274	0.0375
0.00107	0.13671	7.738e-05	0.00329
0.00302	0.09845	0.07759	0.0142
0.00292	0.08215	0.08917	0.0109
0.00417	0.0528	0.14387	0.0673
0.01159	0.05306	0.08894	0.0377
0.00106	0.0108	0.01193	0.0153
0.0131	0.02048	0.000259623	0.0454
0.08124	0.00222	0.000909508	0.125
0.000951154	0.00122	0.00161	0.00904
0.000601812	0.00208	0.000179672	0.018
0.00713	0.00409	0.00419	0.0554
0.00211	0.01199	0.01086	0.0502
0.00333	0.01855	0.00298	0.029
0.000263646	0.00301	0.00111	0.0321
0.00133	0.10031	0.00236	0.033
0.02479	0.03215	0.00331	0.0631
0.00374	0.00296	0.000929765	0.00554
0.00678	0.00842	0.00194	0.012
0.00065225	0.09921	0.01406	0.00369
0.00379	0.09315	0.03751	0.0305
0.04353	0.000520074	0.00233	0.0365
0.12388	0.00579	0.00921	0.000461
0.05747	0.04683	0.02877	0.11
0.00753	0.00781	0.10536	0.0133
0.00781	0.04545	0.01357	0.02
0.06713	0.0213	0.01594	0.00579
0.02415	0.07329	0.0232	0.00173
0.01328	0.13043	0.07334	0.000904
0.00808	0.05765	0.00846	0.0571
0.00734	0.04686	0.00239	0.134
0.05776	0.01672	0.00209	0.00713
0.04931	0.07456	0.00102	0.00221
0.00024433	0.02622	0.00313	0.0954
0.05755	0.02606	0.00278	0.00104
0.06754	0.09064	2.605e-05	0.014
0.00636	0.04714	2.77124e-05	0.00168
0.07801	0.02908	0.00163	0.125
0.01316	0.03161	0.0006634	0.00471
0.00793	0.0399	0.000892123	0.00544
0.13673	0.04324	0.01866	0.0393
0.00212	0.000233224	0.02557	0.00286
0.00542	0.01786	0.00597	0.0183
0.00272	0.02065	0.02489	0.0416
0.00144	0.01771	0.04739	0.023
0.00553	0.03453	0.03188	0.011
0.03126	0.02479	0.00146	0.0542
0.00993	0.00618	0.15125	0.136
0.00547	0.03922	0.00952	0.00504
0.14864	0.00605	0.04362	0.00306
0.01472	0.02643	0.01458	0.00615
0.000767449	0.00343	0.03422	0.0873
0.00643	0.02852	0.00278	0.00522
0.00346	0.07246	0.01144	0.0392
0.01086	0.03789	0.00568	0.0271
0.00457	0.01153	0.01968	0.0153
0.000174581	0.06694	0.00651	0.00571
0.0059	0.096	0.0302	0.0241
0.00772	0.12091	0.03336	0.0161
0.01047	0.02363	0.03388	0.086
0.000183583	0.03304	0.00852	0.0229
0.00235	0.06466	0.00158	0.121
0.02634	0.00746	0.00051442	0.0178
0.04723	0.00715	0.00384	0.0312
0.00781	0.02017	0.01908	0.0329
0.000326316	0.10326	0.000561305	0.0993
0.00155	0.04054	0.02367	0.0765
0.03179	0.03125	0.00455	0.0268
0.00879	0.03193	0.00226	0.0026
0.00537	0.09327	0.02172	0.0354
0.00298	0.01957	0.00214	0.0253
0.000905705	0.04289	0.02786	0.00682
0.02809	0.0328	0.00896	0.00313
0.02269	0.04613	0.04201	0.029
0.00852	0.06855	0.01796	0.125
0.02659	0.15393	0.02122	0.0431
0.00437	0.1174	0.08595	0.00581
0.03617	0.02269	0.00757	0.00965
0.04409	0.06288	0.00215	0.000135
0.01744	0.04674	0.01161	0.0815
0.00155	0.14077	0.000727705	0.122
0.02459	0.00263	0.00229	0.0105
0.00214	0.00187	0.01142	0.000968
0.02456	0.00964	0.000593438	0.0618
0.05906	0.01783	0.03312	0.00598
0.03019	0.0644	0.00465	0.0745
0.00267	0.08947	0.00142	0.0724
0.00164	0.02164	0.02575	0.132
0.00132	0.03593	0.12329	0.146
0.00603	0.08326	0.00282	0.0056
0.01053	0.06798	0.0132	0.119
0.00856	0.01333	0.10077	0.0166
0.00202	0.10302	0.00953	0.122
0.00223	0.0666	0.01802	0.0276
0.000830047	0.08718	0.14992	0.000502
0.01605	0.01207	0.00549	0.0165
0.00649	0.00938	0.00935	0.00319
0.00084946	0.00978	0.01758	0.0596
0.000276899	0.00179	0.00349	0.0455
0.00601	0.00165	0.01274	0.0419
0.00179	0.07439	0.00773	0.00354
0.00813	0.11701	0.00575	0.000927
0.0062	0.00691	0.03198	0.155
0.05971	0.11647	0.00918	0.0291
0.0223	0.12525	0.00462	0.0311
0.02554	0.00582	0.00591	0.00813
0.02607	0.00816	0.00858	0.0271
0.08595	0.04336	0.01311	0.116
0.00994	0.00388	0.000725	9.32e-05
0.01907	0.00278	0.01378	0.0503
0.06005	0.06864	0.01018	0.0783
0.0089	0.08896	0.02028	0.0178
0.03441	0.07147	0.00147	0.0416
0.00767	0.01836	0.06749	0.00796
0.01181	0.0513	0.00035722	0.146
0.08438	0.01027	0.00707	0.0061
0.00688	0.00104	0.01538	0.000486
0.11284	0.11198	0.0723	0.073
0.00916	0.00254	0.00427	0.0695
0.05082	0.12839	0.0151	0.00239
0.01712	0.01697	0.00578	0.00522
0.00151	0.00766	0.02644	0.0172
0.00143	0.08011	0.0204	0.056
0.00107	0.05652	0.000326328	0.0264
0.00359	0.01222	0.00557	0.0524
0.00513	0.02599	0.00964	0.0487
0.05069	0.00124	0.06912	0.0397
0.04819	0.00174	0.02007	0.00556
0.02854	0.00444	0.03621	0.00291
0.02388	0.00847	0.06203	0.0238
0.06692	0.07894	0.01275	0.0212
0.0107	0.00967	0.03193	0.0417
0.01059	0.01852	0.00844	0.0081
0.12408	0.02184	0.0263	0.0231
0.04408	0.00195	0.0024	0.0332
0.0041	0.00389	0.00961	0.104
0.04602	0.000139803	0.01883	0.0953
0.02292	0.000882332	0.04091	0.0102
0.05254	0.15012	0.00382	0.0134
0.02255	0.000765034	0.00138	0.0145
0.01723	0.00695	0.0078	0.0547
0.06449	0.00449	0.03889	0.069
0.01115	0.01252	0.02955	0.0866
0.04523	0.15988	0.01492	0.0315
0.01742	0.08282	0.03252	0.0209
0.09623	0.0132	0.00276	0.0233
0.02315	0.10366	0.026	0.0797
0.0547	0.04079	0.02582	0.146
0.00231	0.01485	0.000896912	0.0548
0.02561	0.11299	0.06395	0.0172
0.05064	0.00512	0.03774	0.0229
0.00145	0.04355	0.03037	0.119
0.00231	0.00365	0.01283	0.0165
0.02656	0.14865	0.00628	0.00676
0.00135	0.0266	0.06079	0.0334
0.03801	0.09974	0.00277	0.0489
0.01774	0.0217	0.00428	0.0313
0.06619	0.01352	0.00606	0.00036
0.01025	0.02223	0.02278	0.000833
0.00022685	0.04275	0.00662	0.0243
0.01228	0.00491	0.00267	0.0101
0.00799	0.09681	0.04745	0.0314
0.01831	0.04321	0.01647	0.0727
0.0032	0.01481	0.03385	0.00962
0.04334	0.07054	0.01051	0.00111
0.00919	0.0245	0.00238	0.0074
0.03087	0.0981	0.02174	0.0186
0.000316212	0.13353	0.07883	0.15
0.15254	0.04118	0.04493	0.143
0.09485	0.05501	0.01223	0.0897
0.01092	0.0006577	0.05009	0.0919
0.00842	0.00756	0.10025	0.0452
0.00695	0.01725	0.03253	0.13
0.0035	0.00888	0.0945	0.00171
0.00155	0.08745	0.07401	0.0823
0.01106	0.08506	0.0252	0.127
0.00626	0.0557	0.00333	0.0259
0.06742	0.04456	0.02381	0.00647
0.08062	0.08929	0.00483	0.00267
0.03941	0.01437	0.04691	0.0188
0.0125	0.01732	0.000573467	0.0135
0.00185	0.00759	0.06497	0.0125
0.0997	0.00381	0.01239	0.0135
0.04282	0.00541	9.90625e-05	0.0225
0.08824	0.000756675	0.00717	0.0128
0.00139	0.00379	0.0619	0.00223
0.00262	0.000603014	0.01803	0.0814
0.00579	0.04738	0.01543	0.0062
0.01334	0.07344	0.12755	0.0649
0.0156	0.00419	0.03766	0.0123
0.04393	0.01003	0.01639	0.00563
0.1254	0.01394	0.02152	0.0255
0.06519	0.00105	0.01216	0.0343
0.02512	4.26545e-05	0.0263	0.018
0.00778	0.0047	0.01833	0.00292
0.0063	0.0529	0.00353	0.0279
0.00166	0.08903	0.07454	0.0214
0.00429	0.00259	0.04748	0.011
0.03604	0.04803	0.0146	0.00229
0.05803	0.04864	0.02721	0.00086
0.00324	0.02249	0.04418	0.0221
0.00411	0.05517	0.02426	0.0849
0.02923	0.02889	0.00080189	0.0164
0.04082	0.00835	0.00895	0.0877
0.00317	0.01188	0.00795	0.00938
0.00963	0.10796	0.000805033	0.108
0.05829	0.04888	0.01581	0.00443
0.01023	0.06975	0.06321	0.0247
0.03955	0.05405	0.0025	0.0346
0.00131	0.00424	0.00484	0.0288
0.0032	0.02348	0.00199	0.057
0.01637	0.03063	0.02958	0.0473
0.00598	0.09921	0.01473	0.000832
0.01743	0.01333	0.0118	0.00158
0.03139	0.11902	0.05786	0.0324
0.00636	0.0591	0.09345	0.0693
0.01224	0.03879	0.04439	0.0555
0.00493	0.03945	0.00066845	0.0399
0.0092	0.03159	0.00815	0.12
0.02062	0.04367	0.00127	0.000767
0.00309	0.05635	0.01199	0.0737
0.08678	0.02879	0.02798	0.14
0.01529	0.00494	0.01186	0.00543
0.04056	0.02082	0.00917	0.0602
0.00938	0.01137	0.03484	0.0403
0.00989	0.02584	0.00452	0.0767
0.01214	0.05485	0.00547	0.16
0.03412	0.00118	0.01163	0.00398
0.0494	0.05172	0.01024	0.00662
0.00882	0.0131	0.12562	0.0338
0.00389	0.04663	0.11784	0.0183
0.09653	0.000197704	0.02859	0.0249
0.02623	0.04445	0.03454	0.0801
0.00384	0.00383	0.05965	0.0293
0.0241	0.00393	0.12582	0.00507
0.00311	0.02772	0.00427	0.00457
0.01308	0.02152	0.13901	0.00338
0.00327	0.09964	0.00263	0.0229
0.00864	0.00112	0.01683	0.00362
0.01831	0.10145	0.01216	0.00242
0.00357	0.04111	0.00346	0.0548
0.03391	0.06902	0.00013757	0.0252
0.02096	0.06367	0.00139	0.0138
0.00647	0.03791	7.373e-05	0.00037
0.15975	0.00822	0.04338	0.0341
0.10858	0.03711	0.01729	0.0035
0.00275	0.00339	0.01406	0.154
0.01012	0.03055	0.00381	0.0104
0.00252	0.02194	0.02215	0.026
0.000442462	0.01505	0.00973	0.0358
0.00251	0.02426	0.00668	0.00935
0.00126	0.03364	0.01015	0.0835
0.00499	0.11676	0.03421	0.0156
0.00158	0.04357	0.02077	0.0279
0.00708	0.07629	0.04276	0.00125
0.008	0.02544	0.01035	0.0206
0.00568	0.00954	0.00276	0.0271
0.01225	0.00492	0.00306	0.000474
0.06141	0.0688	0.00401	0.0096
0.12614	0.00658	0.0437	0.0863
0.00315	0.05231	0.00234	0.0866
0.15855	0.06962	0.00595	0.0247
0.15007	0.03409	0.00751	0.00589
0.01705	0.00468	0.01137	0.00216
0.000768603	0.03146	0.1035	0.141
0.02585	0.0412	0.02718	0.0502
0.00213	0.02961	0.04123	0.0113
0.00693	0.00012223	0.10986	0.000163
0.00145	0.08703	0.07843	0.131
0.0034	0.01301	0.00305	0.122
0.06652	0.06994	0.00688	0.0473
0.01334	0.07864	0.05173	0.0137
0.00652	0.09749	0.02602	0.069
0.01183	0.00811	0.00879	0.0636
0.000388688	0.01	0.07402	0.0543
0.00184	0.1117	0.10083	0.00102
0.00165	0.000701819	0.05204	0.0655
0.00751	0.01215	0.01241	0.0171
0.00134	0.07026	0.0015	0.0738
0.0117	0.11106	0.05473	0.00815
0.00494	0.13875	0.05131	0.0882
0.00157	0.00598	0.0073	0.0458
0.00344	0.01622	0.00507	0.0012
0.00186	0.00159	0.000243514	0.0155
0.02627	0.00345	0.00479	0.00056
0.02407	0.01104	0.00103	0.00476
0.000902714	0.05137	0.000731163	0.00333
0.00624	0.0444	0.00251	0.0382
0.00221	0.08963	0.01521	0.0194
0.00358	0.10556	0.02662	0.00574
0.00333	0.04174	3.89185e-05	0.00105
0.00559	0.01157	0.00743	0.0622
0.000751543	0.00175	0.02096	0.127
0.02557	0.00307	0.03138	0.0823
0.01987	0.0892	0.0129	0.0148
0.07146	0.02221	0.00373	0.0766
0.04636	0.09106	0.00464	0.0179
0.02087	0.03787	0.01239	0.0362
0.00652	0.06863	0.01509	0.0297
0.00122	0.08144	0.00498	0.0123
0.00504	0.00985	0.00664	0.00761
0.00103	0.000571156	0.00835	0.00669
0.0509	0.00283	0.05871	0.0105
0.03287	0.0483	0.02296	0.00757
0.01384	0.04901	0.03252	0.00779
0.000507585	0.00695	0.01348	0.00203
0.06892	0.00333	0.01757	0.0568
0.0107	0.05653	0.01054	0.0454
0.00724	0.01824	0.00464	0.0442
0.0277	0.03106	0.01823	0.0372
0.00144	0.00111	0.000885093	0.0198
0.04216	0.01064	0.000513701	0.0128
0.03212	0.03302	0.000836985	0.0315
0.000749827	0.06488	0.0134	0.00152
0.00814	0.02805	0.00261	0.0889
0.04763	0.0669	0.00813	0.0515
0.00412	0.05726	0.02125	0.0186
0.05898	0.01268	0.06458	0.0136
0.07595	0.02613	0.02467	0.00571
0.02136	0.03215	0.03523	0.021
0.00285	0.01849	0.00204	0.00888
0.000284488	0.00683	0.058	0.0499
0.02805	5.13901e-05	0.03693	0.0621
0.00916	0.01693	0.00012368	0.0277
0.00343	0.02306	0.0119	0.0274
0.000358132	0.0474	0.11632	0.00808
0.01	0.08062	0.00583	0.0325
0.00574	0.00783	0.01413	0.0545
0.01558	0.01704	0.00817	0.0163
0.04367	0.00855	0.06073	0.0824
0.00507	0.04598	0.0175	0.00914
0.13833	0.03544	0.00885	0.0496
0.0151	0.13808	0.11623	0.0305
0.00425	0.02103	0.07276	0.0135
0.03011	0.052	0.04119	0.00388
0.01834	0.00782	0.00464	0.0102
0.00066394	0.01132	0.00672	0.0638
0.01335	0.04034	0.09683	0.00693
0.08245	0.07253	0.01687	0.00305
0.0298	0.05153	0.05104	0.00793
0.03608	0.01393	0.02153	0.0372
0.01956	0.03678	0.00796	0.059
0.07714	0.0126	0.00455	0.0117
0.00447	0.00359	0.00239	0.0477
0.00563	0.05144	0.01881	0.0381
0.00618	0.03959	0.00425	0.0317
0.00682	0.01186	0.02288	8.98e-05
0.00226	0.00449	0.0156	0.0571
0.000734463	0.03032	0.01716	0.121
0.00299	0.02538	0.01254	0.0789
0.00565	0.02509	0.0113	0.15
0.02572	0.02825	0.0607	0.0687
0.00047781	0.02902	0.0057	0.0303
0.0071	0.00136	0.00551	0.0258
0.00436	0.01259	0.00676	0.064
0.01333	0.00405	0.00532	0.105
0.01243	0.0026	0.04938	0.021
0.01093	0.0082	0.0149	0.0415
0.01537	0.00112	0.02367	0.0114
0.03092	0.0584	0.01224	0.00118
0.000593368	0.02034	8.08769e-05	0.000272
0.05477	0.04128	0.00444	0.00481
0.00101	0.13197	0.05034	0.00399
0.0014	0.003	0.01393	0.000223
0.00942	0.00201	0.000282481	0.0599
0.01412	0.0112	0.00431	0.0223
0.000159089	0.07565	0.06338	0.0774
0.00571	0.00362	0.00749	0.00677
0.03531	0.07644	0.02763	0.0661
0.00962	0.01399	0.00519	0.0512
0.0873	0.011	0.0124	0.0123
0.00865	0.05469	0.00979	0.0297
0.0446	0.01666	0.04193	0.0236
0.12052	0.00443	0.000967733	0.0523
0.02344	0.03685	0.01703	0.0423
0.00173	0.06623	0.00562	0.00593
0.00761	0.01393	0.000983682	0.066
0.01199	0.09336	0.01264	0.139
0.00439	0.00772	0.00114	0.0546
0.00188	0.0046	0.01846	0.0829
0.02034	0.03843	0.00381	0.0339
0.00239	0.025	0.000655948	0.00712
0.10935	0.02333	0.02379	0.0167
0.05832	0.04612	0.00609	0.00238
0.03099	0.03406	0.04136	0.0113
0.11834	0.0359	0.03959	0.00501
0.01527	0.03727	0.02838	0.0662
0.04877	0.02022	0.01932	0.0423
0.06996	0.09024	0.01481	0.0333
0.0112	0.000515133	0.01625	0.00363
0.00415	0.00902	0.0288	0.0162
0.01162	0.13877	0.00556	0.00725
0.01942	0.00572	0.01981	0.02
0.01643	0.10543	0.04739	0.0163
0.0016	0.06093	0.01145	0.000681
0.00295	0.0798	0.04446	0.046
0.00264	0.01171	0.00188	0.0461
0.02911	0.10111	0.08854	0.00322
0.08767	0.000223589	0.01425	0.0277
0.08379	0.10941	0.10594	0.0306
0.04477	0.05182	0.00698	0.0546
0.02611	0.01761	0.10692	0.0131
0.11482	0.00606	0.07644	0.0977
0.00121	0.03043	0.01995	0.0527
0.00265	0.09424	0.02759	0.0114
0.00764	0.08505	0.01126	0.046
0.00797	0.15492	0.000115881	0.0172
0.02383	0.006	0.00419	0.0205
0.04051	0.07409	0.02999	0.0718
0.03193	0.0403	0.00473	0.103
0.05788	0.1209	0.01317	0.0288
0.000334186	0.00372	0.01161	0.0153
0.00306	0.02937	0.03724	0.0142
0.00135	0.07247	0.00797	0.00743
0.1208	0.0271	0.01359	0.0598
0.01462	0.09839	0.01147	0.00461
0.00618	0.06376	0.00599	0.12
0.00685	0.09918	0.02966	0.0828
0.01692	0.00567	0.00906	0.00925
0.00889	0.07737	0.01702	0.146
0.01998	0.00871	0.06592	0.0014
0.03112	0.02491	0.02491	0.0273
0.03296	0.02653	0.01876	0.0984
0.00323	0.00714	0.05686	0.0133
0.02353	0.09982	0.00487	0.00781
0.02569	0.05197	0.06854	0.00589
0.00157	0.04619	0.04887	0.0099
0.00992	0.0096	0.02785	0.123
0.02791	0.05068	0.00906	0.103
0.00506	0.00291	0.00926	0.0432
0.00166	0.00166	0.01344	0.004
0.000964276	0.02765	0.06512	0.0286
0.03554	0.04862	0.04103	0.123
0.0252	0.01292	0.07134	0.128
0.00882	0.12753	0.0239	0.0375
0.0859	0.04634	0.03344	0.00771
0.01166	0.13848	0.03712	0.0141
0.00687	0.13527	0.02532	0.00137
0.0031	0.0017	0.03664	0.00555
0.000508282	0.01907	0.00623	0.0545
0.00181	0.02934	0.09658	0.0646
0.00143	0.01213	0.00118	0.0772
0.000944712	0.15087	0.05157	0.0049
7.27957e-05	0.08671	0.09482	0.0457
0.00115	0.11748	0.07772	6.79e-05
0.000538	0.11788	0.00106	0.00411
0.0131	0.03523	0.11438	0.052
0.11761	0.01652	0.00603	0.0685
0.00729	0.00489	0.03608	0.0234
0.00249	0.03176	0.02023	0.0841
6.597e-05	0.02954	0.00917	0.116
0.00388	0.03546	0.04241	0.101
0.00713	0.00861	0.04234	0.0157
5.54362e-05	0.10194	0.01654	0.0153
0.000304016	0.03435	0.01157	0.0288
0.00384	0.08631	0.00377	0.0121
0.00804	0.06652	0.00348	0.0418
0.00119	0.00637	0.00454	0.0498
0.00162	0.06154	0.000200346	0.00458
0.01594	0.0173	0.10371	0.0776
0.11155	0.00956	0.00939	0.0134
0.051	0.02474	0.0202	0.0922
0.00889	0.02363	0.1423	0.027
0.000965604	0.00157	0.02008	0.00352
0.0222	0.05557	0.01208	0.0699
0.02043	0.10321	0.03723	0.0762
0.01312	0.02303	0.00248	0.00238
0.03651	0.03797	0.0085	0.0677
0.04262	0.08474	0.04134	0.0376
0.01111	0.01372	0.02152	0.0925
0.10168	0.01892	0.04292	0.033
0.01883	0.00814	0.00123	0.0855
0.02625	0.00483	0.00382	0.0521
0.01355	0.04039	0.09636	0.0109
0.06111	0.02539	0.03191	0.00144
0.04689	0.03633	0.01776	0.00214
0.0313	0.00554	0.00526	0.0358
0.0618	0.04879	0.00788	0.069
0.00874	0.02657	0.0707	0.126
0.02473	0.00442	0.01454	0.142
0.0036	0.00030589	0.00422	0.0212
0.000613011	0.08183	0.03143	0.00534
0.02894	0.09057	0.03313	0.00402
0.01058	0.04179	0.01015	0.0466
0.00242	0.0783	0.04141	0.0599
0.0039	0.00087029	0.0433	0.0247
0.000913112	0.00029761	0.00381	0.00351
0.00698	0.07421	0.02772	0.15
0.04893	0.00139	0.00256	0.0126
0.09221	0.06434	0.0371	0.0308
0.00387	0.14384	0.04171	0.0125
0.002	0.0135	0.03579	0.049
0.04094	0.000617828	0.00552	0.00498
0.07654	0.08553	0.00124	0.00483
0.04179	0.00917	0.00801	0.0564
0.07942	0.01041	0.06768	0.0149
0.13165	0.03751	0.04447	0.0819
0.0231	0.00649	0.000155281	0.0628
0.0213	0.00897	0.000906506	0.0669
0.01115	0.00904	0.01358	0.0212
0.02021	0.12829	0.00591	0.13
0.00961	0.03214	0.03748	0.0165
0.0012	0.09305	0.00826	0.13
0.00493	0.14461	0.00139	0.0233
0.04199	0.02244	0.00645	0.106
0.00306	0.13367	0.000728919	0.0101
0.01765	0.03589	0.00586	0.0128
0.00267	0.04237	0.03744	0.0586
0.04064	0.13222	0.00153	0.115
0.0186	0.09271	0.0036	0.00618
0.03513	0.01156	0.08177	0.0105
0.01634	0.02091	0.01478	0.00917
0.00766	0.0965	0.000142885	0.0159
0.02364	0.10895	0.04085	0.0138
0.08319	0.01053	0.07028	0.00257
0.0388	0.00343	0.000912888	0.00543
0.00867	0.03242	0.00759	0.0184
0.12165	0.00509	0.00036482	0.0152
0.09879	0.10943	0.00165	0.0806
0.1314	0.02515	0.000122976	0.114
0.00375	0.00115	0.00746	0.0304
0.07815	0.00599	0.000563313	0.028
0.00597	0.00643	0.00233	0.00154
0.00563	0.00148	0.00578	0.00458
0.00272	1.157e-05	0.00692	0.124
0.00773	0.00523	0.00795	0.00263
0.00319	0.03243	0.03314	0.155
0.00443	0.01634	0.01346	0.0382
0.00877	0.00251	0.02989	0.0137
0.0468	0.09914	0.02402	0.00358
0.000144849	0.02943	0.01717	0.00611
0.00805	0.14316	0.0258	0.0667
0.0145	0.00856	0.02851	0.0366
0.03814	0.11981	0.01063	0.0304
0.00948	0.0498	0.00918	0.0354
0.03636	0.02208	0.01051	0.155
0.01173	0.07849	0.02345	0.0854
0.01774	9.4229e-06	0.0076	0.00341
0.02496	0.00482	0.01607	0.0872
0.06726	0.00863	0.02345	0.0892
0.02817	0.0368	0.00356	0.00549
0.07606	0.02994	0.02329	0.0263
0.0346	0.00572	0.06909	0.0023
0.0094	0.00514	0.08126	0.128
0.00134	0.0133	0.0024	0.0636
0.00243	0.0234	0.01421	0.0101
0.00315	0.02621	0.0291	0.0207
0.01051	0.08738	0.00429	0.0457
0.00525	0.00884	0.06036	0.0105
0.000893679	0.0044	0.04565	0.00545
0.000575339	0.0074	0.00463	0.00146
0.000207856	0.01454	0.00389	0.000479
0.02288	0.0084	0.00242	0.027
0.01684	0.02574	0.02476	0.0123
0.0075	0.000336563	0.00707	0.021
9.497e-05	0.01563	0.01679	0.00311
0.01487	0.04534	0.03578	0.00618
0.01834	0.0699	0.05066	0.00785
0.000135468	0.01065	0.07279	0.0176
0.00332	0.02657	0.00247	0.0236
0.00273	0.01056	0.10745	0.0864
0.000479156	0.02597	0.00733	0.0548
0.00155	0.06264	0.0169	0.0191
0.00245	0.000589024	0.00289	0.013
0.000734429	0.0614	0.04919	0.00978
0.01102	0.07038	0.01016	0.01
0.00173	0.08974	0.03656	0.145
0.01094	0.00849	0.02192	0.0882
7.492e-05	0.01161	0.01542	0.144
0.02164	0.02332	0.01087	0.00539
0.03347	0.14717	0.05128	0.0158
0.10659	0.01155	0.01199	0.0483
0.03629	0.0463	0.0176	0.0315
0.00896	0.06178	0.04548	0.0345
0.03267	0.00788	0.00825	0.0861
0.00412	0.06195	0.05854	0.0488
0.02726	0.02054	0.0083	0.0194
0.00477	0.0555	0.01934	0.00158
0.04068	0.08433	0.03869	0.0621
0.00296	0.0974	0.05304	0.0676
0.0331	0.00325	0.01754	0.0345
0.00289	0.00578	0.01271	0.0139
0.0088	0.00221	0.0364	0.0184
0.10082	0.00208	0.00199	0.021
0.00886	0.02944	0.03854	0.00393
0.00257	0.01059	0.00025857	0.11
0.00402	0.13919	0.03453	0.0951
0.00095931	0.02895	0.02149	0.0401
0.00342	0.04872	0.07084	0.0229
0.005	0.02426	0.02452	0.00263
0.00566	0.09259	0.01529	0.000762
0.00814	0.02715	0.02305	0.00172
0.03452	0.01987	0.00155	0.00582
0.00134	0.01799	0.05214	0.00206
0.03505	0.01076	0.00248	0.0332
0.06367	0.00912	0.01995	0.104
0.00451	0.04694	0.00672	0.149
0.00115	0.07029	0.0262	0.0297
0.00359	0.03982	0.01674	0.0099
0.00152	0.09321	0.00187	0.0604
0.00261	0.07692	0.01381	0.0647
0.000810549	0.0033	0.0182	0.037
0.00731	0.04198	0.1047	0.0161
0.00192	0.11878	0.1129	0.0152
0.01152	0.08403	0.01772	0.00598
0.02886	0.15483	0.00276	0.0749
0.00319	0.10735	0.00154	0.0984
0.03059	0.11226	0.0117	0.0697
0.02259	0.02371	0.07434	0.0194
0.04684	0.01785	0.01507	0.00274
0.00266	0.00626	0.02154	0.00574
0.02423	0.02117	0.07104	0.00233
0.01396	0.04641	0.11446	0.00952
0.00498	0.03546	0.0017	0.00962
0.00234	0.00292	0.00426	0.139
0.00468	0.0268	0.000184061	0.024
0.01014	0.13078	0.02233	0.0497
0.01747	0.0114	0.01779	0.0787
0.00423	0.0472	0.000338138	0.0194
5e-06	0.04506	0.000523062	0.0411
0.00369	0.00207	0.01968	0.000887
0.01422	0.00789	0.01834	0.000807
0.01061	0.01385	0.06073	0.0136
0.00544	0.04766	0.00328	0.00169
0.00278	0.00652	0.04825	0.00336
0.00837	0.03786	0.00968	0.00393
0.04528	0.00653	0.04265	0.0559
0.00944	0.08644	0.000635509	0.0145
0.0299	0.12893	0.00982	0.0655
0.01265	0.04938	0.01644	0.0438
0.000703888	0.14943	0.0014	0.00704
0.000209313	0.07185	0.01137	0.0147
0.00708	0.02484	0.03072	0.0483
0.00534	0.03722	0.08748	0.0244
0.00945	0.10515	0.07693	0.0305
0.01748	0.05363	0.04404	0.00118
0.03516	0.01544	0.04475	0.00739
0.00454	0.034	0.00126	0.0637
0.00237	0.11082	0.00207	0.0345
0.00213	0.14965	0.00252	0.00884
0.01469	0.06678	0.00149	0.0914
0.01734	0.10096	0.00417	0.0154
0.05693	0.03211	0.000700883	0.0239
0.04021	0.05218	0.00689	0.0371
0.00111	0.01741	0.00658	0.0346
0.0023	0.00937	0.00413	0.063
0.01422	0.04267	0.00291	0.00113
0.00451	0.02887	0.00975	7.4e-05
0.03525	0.06801	0.02401	0.0423
0.01978	0.05635	0.09812	0.152
0.01162	0.02334	0.00652	0.0247
0.000602384	0.00168	0.00258	0.0696
0.00242	0.03444	0.0288	0.0161
0.000595024	0.00724	0.00345	0.000211
0.00149	0.0604	0.00828	0.131
0.00376	0.0098	0.10153	0.0483
0.000225304	0.01334	0.00384	0.051
0.00114	0.0498	0.00745	0.0107
0.0016	0.05679	0.02455	0.152
0.05078	0.03652	0.000307468	0.11
0.01062	0.0631	0.13462	0.052
0.00203	0.14028	0.0078	0.035
0.00249	0.04703	0.05508	0.00451
0.03237	0.01599	0.00564	0.0248
0.01219	0.03605	0.01203	0.121
0.00239	0.13358	0.00432	0.0194
0.000765001	0.05378	0.01068	0.116
0.0896	0.00992	0.00259	0.11
0.02291	0.12924	0.00023079	0.0639
0.04585	0.0447	0.02355	0.00317
0.03514	0.0223	0.05805	0.0673
0.06831	0.03386	0.02766	0.00686
0.06625	0.04427	0.01766	0.079
0.01065	0.000847512	0.00574	0.0754
0.00394	0.01304	0.00963	0.0331
0.00041236	0.02709	0.02934	0.0081
0.00153	0.00145	0.1367	0.0331
0.01291	0.02409	0.0024	0.00597
0.00247	0.00899	0.08858	0.0158
0.00323	0.00479	0.05817	0.127
0.00258	0.0057	0.06308	0.0223
0.10528	0.01823	0.00458	0.0884
0.00817	0.02107	0.0103	0.051
0.03709	0.00441	0.01018	0.0497
0.01025	0.0738	0.13199	0.00178
0.000415018	0.03739	0.03578	0.0273
0.00219	0.06501	0.013	0.0795
0.000921505	0.07355	0.00749	0.0116
0.00116	0.13227	0.00908	0.00398
0.13039	0.01981	0.0221	0.0299
0.000396495	0.11551	0.13436	0.0146
0.00372	0.03451	0.000897073	0.0276
0.000499583	0.01357	1.30489e-05	0.101
0.03143	0.06114	0.10596	0.13
0.00521	0.02071	0.00298	0.011
0.000511813	0.08507	0.00503	0.0188
0.00227	0.00123	0.02904	0.0242
0.000113988	0.00118	0.00551	0.0316
0.00254	0.01168	0.000574962	0.129
0.00517	0.0247	8.42564e-05	0.0222
0.00904	0.07168	0.05782	0.0254
0.00307	0.02697	0.00101	0.0147
0.00175	0.06444	0.1449	0.0201
0.06171	0.15236	0.01386	0.113
0.0054	0.12892	0.03388	0.00632
0.000220167	0.11492	0.01321	0.0485
0.00359	0.00378	0.00077611	0.00519
0.00582	0.0032	0.00223	0.0142
0.00416	0.07666	0.02523	0.147
0.00259	0.01233	0.12344	0.0823
0.02737	0.07681	0.02301	0.019
0.02444	0.00556	0.0613	0.0374
0.01435	0.02514	0.00131	0.0955
0.00582	0.05299	0.00023808	0.0165
0.00206	0.00182	7.05764e-05	0.00131
0.00032427	0.092	0.00837	0.00202
0.00226	0.01181	0.09187	0.00173
0.00551	0.02056	0.03548	0.028
0.00083178	0.07353	0.12701	0.113
0.02046	0.02366	0.0479	0.0253
0.04867	0.02742	0.02412	0.0199
0.00189	0.03066	0.03369	0.0652
0.01527	0.06029	0.00975	0.0352
0.0098	0.01569	0.00992	0.0563
0.03404	0.01313	0.00042397	0.0478
0.03799	0.11662	0.00122	0.0316
0.00409	0.00862	0.00134	0.087
0.01841	0.00535	0.00458	0.00758
0.0011	0.07155	0.00246	0.0978
0.00274	0.05309	0.01043	0.0593
0.01435	0.04945	0.00904	0.0884
0.01103	0.09966	0.02441	0.0651
0.01101	0.11531	0.02202	0.0138
0.01275	0.0198	0.014	0.000106
0.00299	0.0031	0.08245	0.00317
0.07225	0.01116	0.00744	0.0553
0.01822	0.05538	0.00696	0.000601
0.00982	0.07325	0.05202	0.052
0.00919	0.07215	0.03553	0.124
0.000828994	0.00737	0.01575	0.0944
0.00466	0.0358	0.02516	0.00327
0.00383	0.06774	0.04196	0.000912
0.000184089	0.07795	0.00856	0.0061
0.00451	0.01688	0.00176	0.0352
0.08676	0.01058	0.00369	0.00858
0.00162	0.00759	0.01378	0.0219
0.000157768	0.01	0.09976	0.0352
0.06317	0.06269	0.00742	0.101
0.0013	0.00277	0.00292	0.0495
0.000215536	0.01097	0.07305	0.114
0.01739	0.03062	0.00145	0.106
0.10135	0.15651	0.00317	0.0335
0.03767	0.15568	0.000215914	0.032
0.02495	0.02059	0.00838	0.0353
0.006	0.15394	0.10515	0.0268
0.000591011	0.01877	0.01206	0.008
0.00777	0.01239	0.02773	0.000626
0.00426	0.01257	0.0162	0.041
0.01354	0.02385	0.00125	0.00766
0.00178	0.01355	0.000858953	0.00417
0.10345	0.04585	0.02917	0.0104
0.13557	0.00348	0.000689573	0.00879
0.00489	0.0116	0.13976	0.00432
0.00214	0.01357	0.02694	0.0559
0.00121	0.05104	3.6244e-06	0.0176
0.01922	0.00762	0.00833	0.00414
0.00111	0.03398	0.00546	0.039
0.00152	0.01792	0.009	0.00255
0.000485588	0.00893	0.01358	0.0761
0.0013	0.09223	0.0048	0.00275
0.00341	0.08849	0.00284	0.0138
0.00251	0.03044	0.09365	0.0546
0.000672179	0.01598	0.08725	0.0119
0.000854542	0.02272	0.01277	0.0815
0.00163	0.0433	0.01736	0.00319
0.00373	0.03471	0.00020241	0.00096
0.00838	0.01449	0.01953	0.00328
0.02671	0.02985	0.00261	0.0185
0.01709	0.0107	0.02102	0.113
0.00567	0.02503	0.01134	0.0102
0.00408	0.05421	0.03971	0.000153
0.00685	0.000589125	0.03028	0.00726
0.14218	0.04411	0.0156	0.00572
0.02007	0.07066	0.01111	0.0292
0.00751	0.11881	0.04499	0.00323
0.00341	0.01486	0.000372888	0.0442
0.00572	0.06318	0.00202	0.00524
0.00124	0.10088	0.02491	0.00274
0.00572	0.09984	0.0412	0.015
0.01861	0.02425	0.01146	0.000559
0.02693	0.04575	0.05153	0.00404
0.05095	0.11763	0.01995	0.0305
0.01325	0.0813	0.01674	0.113
0.00073504	0.14378	0.01395	0.0833
0.00692	0.0495	0.00323	0.0723
0.00251	0.00791	0.000385127	0.00263
0.00117	0.06048	0.02888	0.017
0.00376	0.03401	0.00526	0.0164
0.00587	0.0076	0.000748721	0.0121
0.02576	0.00344	0.02227	0.00523
0.0009526	0.0044	0.05698	0.0271
0.00975	0.04735	0.02189	0.0069
0.00099577	0.02917	0.01581	0.0605
0.07767	0.09319	0.14148	0.0943
0.04719	0.00587	0.00549	0.0847
0.000326804	0.04483	0.11436	0.0228
0.00146	0.03033	0.01588	0.0156
0.00333	0.02463	0.02903	0.000679
0.00649	0.02896	0.12869	0.135
0.00492	0.04077	0.00735	0.0517
0.00543	0.0314	0.00342	0.13
0.00918	0.000505344	0.00573	0.0194
0.00771	0.03528	0.00629	0.0123
0.00472	0.02043	0.04043	0.0229
0.00899	0.01583	0.0091	0.0137
0.00316	0.1144	0.04575	0.0189
0.02101	0.01332	0.01297	0.101
0.05615	0.02284	0.00699	0.0322
0.00246	0.07429	0.03992	0.0947
0.00415	0.00146	0.00528	0.115
0.0036	0.11711	0.01558	0.0409
0.00036561	0.01562	0.00808	0.0256
0.00537	0.02518	0.04148	0.011
0.00262	0.00641	0.00212	0.00531
4.36826e-05	0.09757	0.02399	0.00947
0.00209	0.1038	0.00938	0.00349
0.00823	0.03102	0.000365024	0.00122
0.00124	0.00748	0.00512	0.0739
0.000969	0.04924	0.0535	0.00257
0.00165	0.03537	0.000995344	0.0612
0.01563	0.00262	0.03345	0.00282
0.00901	0.00989	0.06061	0.111
0.00192	0.07158	0.06236	0.0393
0.137	0.0852	0.00794	0.052
0.12356	0.14613	0.01404	0.0749
0.01344	0.01355	0.0243	0.00676
0.00248	0.03338	0.01943	0.018
0.00217	0.01127	0.00466	0.0174
0.05437	0.11667	0.0976	0.125
0.02174	0.00846	0.02284	0.0432
0.01041	0.08658	0.003	0.0483
0.00608	0.11179	0.00239	0.000405
0.00484	0.15115	0.0091	0.0542
0.00455	0.03179	0.00354	0.0189
0.0012	0.06064	0.000247825	0.0137
0.0002826	0.10815	0.00871	0.115
0.01095	0.02946	0.01833	0.015
0.0045	0.000256428	0.00678	0.0898
0.00146	0.10309	0.000786145	0.0136
0.01066	0.01307	0.00198	0.00224
0.0011	0.02986	0.07719	0.143
0.000456232	0.12478	0.02875	0.00958
0.02848	0.02939	0.0093	0.000752
0.00994	0.04848	0.00151	0.00348
0.04036	0.02137	0.09363	0.0164
0.04862	0.00636	0.00845	0.0319
0.01408	0.01977	0.04251	0.0239
0.01391	0.00296	0.01075	0.0481
0.00157	0.0124	0.02464	0.0235
0.00948	0.03522	0.00848	0.0156
0.02109	0.02265	0.02759	0.102
0.06147	0.00718	0.00766	0.105
0.01321	0.14063	0.0033	0.101
0.0233	0.15918	0.03072	0.117
0.01116	0.05579	0.02683	0.129
0.09097	0.06924	0.00347	0.0519
0.00599	0.15413	0.016	0.0352
0.02001	0.06295	0.13078	0.13
0.02501	0.00387	0.03741	0.0237
0.0389	0.00841	0.03799	0.0837
0.01799	0.08828	0.04529	0.0133
0.01136	0.1251	0.0057	0.125
0.00010625	0.04147	0.049	0.0265
0.02128	0.06231	0.0076	6.4e-05
0.0038	0.01311	0.08408	0.0447
0.03655	0.06294	0.02422	0.0358
0.05604	0.14419	0.01502	0.0025
0.12048	0.06023	0.02975	0.00972
0.01304	0.00496	0.05115	0.0242
0.04657	0.01826	0.13049	0.022
0.02214	0.04147	0.15962	0.00173
0.04334	0.01404	0.02047	0.0313
0.01608	0.0195	0.01763	0.0317
0.00288	0.10863	0.00334	0.0218
0.00289	0.02982	0.07094	0.000126
0.00342	0.01308	0.05149	0.00308
0.00571	0.00171	0.11231	0.0388
0.0042	0.03035	0.0272	0.116
0.000464445	0.03848	0.00452	0.0632
0.0038	0.000786126	0.00281	0.0197
0.00427	0.06978	0.02656	0.00173
0.03139	0.03734	0.000751694	0.00933
0.0042	0.0659	0.00619	0.0438
0.02791	0.00105	0.00427	0.00888
0.00616	0.13466	0.02526	0.0484
0.00254	0.02098	0.00406	0.00173
0.00151	0.10253	0.02402	0.109
0.00532	0.06874	0.05972	0.109
0.05636	0.05846	0.014	0.0329
0.15612	0.03718	0.04685	0.0108
0.00133	0.01751	0.06316	0.0443
0.00013537	0.00131	0.00223	0.00199
0.00425	0.0726	0.01215	0.0336
0.05573	0.09402	0.0244	0.131
0.01977	0.03939	0.11137	0.141
0.0539	0.04579	0.04607	0.00763
0.05029	0.01369	0.05002	0.0214
0.00727	0.05157	0.00256	0.0389
0.00161	0.0019	0.00405	0.00154
0.00391	0.01147	0.00972	0.027
0.00123	0.04083	0.03024	0.0142
0.00121	0.09192	0.02933	0.0548
0.00017834	0.0907	0.00585	0.084
0.00302	0.01808	0.02268	0.00924
0.0008485	0.00713	0.07	0.00096
0.00101	0.02563	0.01874	0.0788
0.01365	0.0613	0.01948	0.0325
0.01936	0.01036	0.0093	0.0648
0.01738	0.02503	0.04635	0.0187
0.01286	0.04697	0.03199	0.000884
0.0996	0.01774	0.03293	0.103
0.00628	0.05274	0.03624	0.00391
0.01507	0.00797	0.00505	0.111
0.00568	0.00245	0.04692	0.000412
0.00522	0.12951	0.00493	0.0131
0.00334	0.05295	0.02365	0.115
0.08355	0.06445	0.1558	0.0193
0.0046	0.01666	0.00256	0.0284
0.02942	0.00464	0.000289514	0.0155
0.01382	0.02461	0.00452	0.0254
0.0159	0.15764	0.01364	0.0728
0.00133	0.02618	0.01785	0.0224
0.00235	0.08375	0.0257	0.0156
0.01804	0.08697	0.02645	0.00278
0.00632	0.04354	0.0223	0.000981
0.00143	0.05057	0.00496	0.0143
0.00428	0.01385	0.01203	0.00886
0.0362	0.02687	0.02589	0.0106
0.02483	0.13653	0.01693	0.157
0.00981	0.0401	0.02489	0.0895
0.00297	0.05036	0.00187	0.00309
0.0067	0.08459	0.0158	0.000901
0.00741	0.07852	0.08522	0.00299
0.00272	0.0455	0.00533	0.00723
0.01212	0.00364	0.05075	0.00225
0.01378	0.10263	0.0246	0.0194
0.05723	0.08527	0.00608	0.0539
0.11751	0.03342	9.48289e-05	0.0243
0.03507	0.02608	0.0021	0.0159
0.02157	0.01036	0.00591	0.0343
0.10032	0.08549	0.00157	0.0115
0.00728	0.00678	0.11355	0.00202
0.09403	0.0105	0.01134	0.00386
0.06716	0.11098	0.04425	0.0265
0.03003	0.12145	0.03416	0.00794
0.00774	0.14337	0.01008	0.00523
0.06988	0.0324	0.00457	0.0443
0.01764	0.00622	0.01464	0.000783
0.02728	0.0092	0.01239	0.0276
0.02744	0.02372	0.00794	0.0375
0.0041	0.00384	0.00104	0.0892
0.02459	0.02165	0.02148	0.131
0.0256	0.03836	0.00718	0.00688
0.00198	0.10009	0.01361	0.0976
0.02217	0.1211	0.01194	0.00322
0.00082754	0.12685	0.0141	0.037
0.13882	0.0476	0.0089	0.00357
0.00503	0.06699	0.00507	0.000722
0.02343	0.00873	0.00301	0.00144
0.15358	0.05169	0.03682	0.0408
0.00258	0.04648	0.0633	0.0261
0.00155	0.12591	0.00199	0.00362
0.01837	0.00532	0.00443	0.111
0.01077	0.02244	0.10034	0.0314
0.00099591	0.04117	0.03288	0.0127
0.00050584	0.09805	0.04031	0.00197
0.00704	0.01118	0.01722	0.00403
0.00865	0.00374	0.05183	0.0114
0.04454	0.08392	0.05717	0.0885
0.00785	0.01519	0.00318	0.065
0.08053	0.02965	0.09433	0.0291
0.05988	0.0225	0.03757	0.0162
0.0234	0.00383	0.02266	0.0712
0.00519	0.10803	0.00971	0.00589
0.02739	0.04706	0.01081	0.0637
0.01552	0.01694	0.01755	0.155
0.06449	0.01021	0.0135	0.0355
0.00634	0.04854	0.01025	0.0462
0.02806	0.00504	0.07832	0.0315
0.07893	0.02296	0.0349	0.0248
0.04544	0.02323	0.00484	0.00119
0.09739	0.01152	0.00216	0.0112
0.02728	0.08294	0.09215	0.00125
0.00783	0.01527	0.06007	0.0375
0.00333	0.01134	0.01685	0.0601
0.00141	0.01747	0.00696	0.0348
0.00217	0.00738	0.00292	0.0684
0.00224	0.04205	0.11707	0.00946
0.000275226	0.02056	0.01445	0.0337
0.000361722	0.00875	0.00205	0.0213
0.12142	0.01026	0.000330199	0.00511
0.01098	0.01673	0.00336	0.00185
0.00128	0.01965	0.0017	0.0073
0.00239	0.04613	0.02077	0.0135
0.01507	0.08199	0.00608	0.0322
0.00993	0.00491	0.01048	0.0144
0.00338	0.01838	0.00639	0.0014
0.00248	0.13999	0.00621	0.0261
0.02019	0.00211	0.04774	0.0873
0.00785	0.00363	0.05126	0.0592
0.10854	0.0792	0.05135	0.000941
0.00141	0.04108	0.00593	0.000724
0.00249	0.03842	0.0028	0.00241
0.00739	0.06159	0.00315	0.00573
0.00521	0.01993	0.0483	0.00978
0.00435	0.01849	0.00114	0.00427
0.000249077	0.07849	0.0145	0.0904
0.02187	0.11318	0.04407	0.0496
0.00677	0.00227	0.05997	0.103
0.01567	0.05953	0.00624	0.0032
0.09538	0.13402	0.01072	0.00188
0.01606	0.02986	0.00793	0.00437
0.02105	0.0096	0.01945	0.0908
0.00395	0.02784	0.000456284	0.0147
0.01689	0.00576	0.00389	0.0283
8.97284e-05	0.01743	0.01132	0.0323
0.0014	0.02856	0.0045	0.0097
0.08867	0.02625	0.00117	0.00246
0.04912	0.0318	0.00568	0.012
0.0113	0.01497	0.000307807	0.0378
0.0392	0.15269	0.0047	0.0446
0.0208	0.09975	0.00308	0.00538
0.07328	0.02556	0.00195	0.00172
0.02652	0.04279	0.00271	0.0101
0.02799	0.02862	0.02726	0.00398
0.02344	0.0742	0.00214	0.101
0.02315	0.04569	0.00798	0.0276
0.11141	0.0174	0.00819	0.0553
0.00137	0.08779	0.00059777	0.00458
0.00364	0.01464	0.0238	0.0212
0.01979	0.00163	0.02651	0.0573
0.00068832	0.10596	0.000870323	0.0336
0.00465	0.04143	0.00346	0.011
0.02456	0.00111	0.00968	0.0228
0.03527	0.06485	0.0033	0.0454
0.00461	0.02218	0.05964	0.0522
0.11013	0.06936	0.03849	0.0618
0.01007	0.14435	0.00999	0.0706
0.04742	0.05807	0.00213	0.0546
0.07235	0.0027	0.00548	0.151
0.00528	0.07972	0.07922	0.0952
0.01452	0.11079	0.01106	0.0017
0.13548	0.05793	0.02566	0.0202
0.00429	0.00274	0.00321	0.00174
0.02021	0.00917	0.01842	0.0742
0.0787	0.0123	0.02244	0.128
0.00314	0.0865	0.00818	0.00864
0.01708	0.12272	0.00477	0.0353
0.05987	0.04964	0.00192	0.0461
0.12494	0.02825	0.0164	0.00426
0.00702	0.12324	0.01473	0.0873
0.00604	0.0159	0.02609	0.00452
0.00545	0.01881	0.00561	0.00385
0.00593	0.0965	0.06288	0.0113
0.01513	0.13121	0.02145	0.0474
0.00080804	0.02719	0.01794	0.0172
0.00716	0.05009	0.00951	0.03
0.00286	0.04457	0.01764	0.00585
0.01183	0.02161	0.00264	0.0145
0.0263	0.04093	0.00594	0.0138
0.000270103	0.00344	0.00748	0.0308
0.0639	0.00271	0.00387	0.142
0.00543	0.00892	0.03835	0.000297
0.03103	0.00265	0.01188	0.00219
0.03787	0.05685	0.01469	0.0755
0.08681	0.02129	0.00886	0.0237
0.000916648	0.10311	0.01372	0.00572
0.01027	0.0068	0.01351	0.0488
0.03348	0.00552	0.00255	0.0194
0.01618	0.02154	0.09181	0.0556
0.00131	0.09858	0.00553	0.0367
0.00253	0.00902	0.04464	0.0347
0.024	0.0007585	0.02143	0.0198
0.00501	0.00214	0.02383	0.00515
0.02489	0.09645	0.00792	0.00815
0.02276	0.02828	0.00374	0.0288
0.12363	0.12384	0.00757	0.0165
0.04598	0.13713	0.09612	0.0859
0.00829	0.01188	0.05164	0.0179
0.02753	0.13502	0.0902	0.00125
0.00218	0.01482	0.00813	0.000299
0.000523258	0.00503	0.00968	0.000156
0.01346	0.00897	0.01695	0.00176
0.01943	0.00295	0.00914	0.00899
0.07684	0.14452	0.00622	0.133
0.06064	0.01159	0.01007	0.0266
0.0028	0.0452	0.03961	0.0111
0.02023	0.0846	0.15356	0.0422
0.02447	0.07208	0.0596	0.00238
0.00131	0.00473	0.00204	0.0115
0.02655	0.00372	0.04395	0.0136
0.07108	0.02204	0.00493	0.0145
0.00478	0.00108	0.05204	0.0799
0.02565	0.000913932	0.0292	0.0339
0.00666	0.00266	0.000109174	0.0282
0.019	0.00108	0.00746	0.0654
0.01062	0.00726	0.02368	0.0503
0.0561	0.00509	0.04959	0.0834
0.03946	0.09412	0.0901	0.0212
0.04612	0.01825	0.10891	0.0915
0.000847476	0.00921	0.01115	0.0224
0.00141	0.00305	0.00434	0.0339
0.01334	0.0036	0.01285	0.00158
0.03474	0.01928	0.1201	0.00921
0.04225	0.00277	0.04973	0.0365
0.00273	0.00124	0.01156	0.000369
0.00415	0.01284	0.000690489	0.00241
0.00266	0.08845	0.0049	0.0186
0.00289	0.02158	0.03501	0.0695
0.01345	0.00133	0.03348	0.00662
0.00615	0.02973	0.06636	0.0134
0.01568	0.00697	0.00465	0.000114
0.00146	0.01343	0.03565	0.00706
1.48429e-05	0.01994	0.06337	8.17e-06
0.003	0.01854	0.01154	0.0196
0.00235	0.06969	0.01033	0.00809
0.00827	0.04158	0.00764	0.0812
0.00067405	0.02867	0.08478	0.011
0.00872	0.03845	0.01858	0.0239
0.01008	0.10736	0.00586	0.0393
0.04713	0.02083	0.01372	0.00252
0.04856	0.10058	0.00268	0.112
0.00481	0.000964402	0.09744	0.101
0.04942	0.00131	0.05418	0.0545
0.08044	0.02306	0.04277	0.00197
0.000685847	0.05926	0.02739	0.00767
0.01437	0.13739	0.02071	0.121
0.00425	0.1067	0.10242	0.0759
0.00777	0.1291	0.10458	0.0357
0.04868	0.01098	0.03485	0.00144
0.01091	0.00679	0.13145	0.038
0.01259	0.00612	0.1359	0.0985
0.06382	0.14749	0.10107	0.107
0.04442	0.10474	0.01777	0.0373
0.06282	0.0039	0.000580152	0.0131
0.11644	0.02171	0.01603	0.0442
0.00687	0.02121	0.01991	0.0972
0.00929	0.02501	0.000601914	0.0107
0.00149	0.08114	0.01496	0.0826
0.0036	0.04787	0.00422	0.0241
0.00889	0.02069	0.03295	0.0251
0.00123	0.03672	0.0031	0.0209
0.02282	0.0042	0.01776	0.00557
0.01387	0.03244	0.00666	0.0272
0.00645	0.00709	0.02853	0.125
0.02841	0.01045	0.02579	0.0791
0.00411	0.01486	0.09149	0.0124
0.01383	0.013	0.02689	0.0077
0.02068	0.15579	0.05388	0.0513
0.00551	0.03578	0.00793	0.0121
0.0034	0.03005	0.01634	0.046
0.01365	0.0011	0.09403	0.00759
0.15239	0.03211	0.000575352	0.0296
0.00152	0.07267	0.00404	0.0131
0.02402	0.00349	0.04911	0.000332
0.00196	0.00792	0.002	0.0394
0.04627	0.00569	0.00221	0.00311
0.00849	0.01884	0.03395	0.00032
0.00453	0.07473	0.00252	0.0031
0.02456	0.02377	0.00295	0.148
0.00699	0.01699	0.07212	0.0297
0.00014992	0.0821	0.04052	0.0806
0.000499548	0.00579	0.03316	3.93e-05
0.08358	0.00828	0.02699	0.0128
0.00134	0.03749	0.11238	0.035
0.04442	0.00781	0.00649	0.0673
0.06124	0.00355	0.00225	0.0377
0.00268	0.00437	0.06046	0.116
0.08752	0.00898	0.02659	0.0251
0.11892	0.07593	0.02109	0.00719
0.04872	0.08828	0.02653	0.107
0.000287869	0.01942	0.00163	0.0237
0.00369	0.03207	0.10645	0.000318
0.07565	0.03766	0.03756	0.0113
0.06201	0.01134	0.05811	0.0158
0.00231	0.01084	0.04713	0.0257
0.08544	0.0135	0.0406	0.0678
0.00915	0.01365	0.00536	0.0261
0.04489	0.00156	0.12173	0.00793
0.02535	0.00867	0.00726	0.00514
0.00158	0.00221	0.01228	0.103
0.00472	0.0053	0.04239	0.0339
0.05052	0.00306	0.00222	0.0275
0.01746	0.06717	0.00112	0.0761
0.00509	0.00643	0.01538	0.0654
0.00136	0.00783	0.03029	0.0858
0.0121	0.08492	0.02193	0.0108
0.0096	0.000151486	0.01223	0.0734
0.02334	0.02051	0.00090961	0.0668
0.09742	0.00676	0.00152	0.0285
0.04209	0.04567	5.81321e-05	0.0787
0.00884	0.00407	0.03167	0.0671
0.04935	0.000639059	0.00112	0.0131
0.04589	0.00424	0.01109	0.13
0.02472	0.00985	0.00665	0.00466
0.01328	0.03238	0.02152	0.0164
0.00926	0.00263	0.00137	0.00781
0.04871	0.00668	0.000706536	0.00687
0.08879	0.04677	0.01428	0.0141
0.01687	0.04137	0.00209	0.0854
0.00832	0.13715	0.00796	0.0595
0.04391	0.04686	0.02838	0.0365
0.03345	0.03922	0.00066105	0.00552
0.06912	0.0177	0.12642	0.0193
0.04895	0.02216	0.01858	0.0264
0.02726	0.15585	0.01892	0.0148
0.0347	0.13257	0.00113	0.0426
0.07963	0.00781	0.02148	0.0444
0.00562	0.02777	0.04647	0.0412
0.000352773	0.00389	0.01133	0.0082
0.07353	0.12139	0.01298	0.0128
0.00733	0.1108	0.04168	0.0101
0.06419	0.03011	0.04523	0.0173
0.00707	0.0987	0.00677	0.0803
0.00683	0.1425	0.04838	0.00855
0.00415	0.000558737	0.000268822	0.00125
0.00477	0.04281	0.00871	0.0011
0.03197	0.02	0.00621	0.000465
0.03296	0.0963	0.00395	0.0729
0.01654	0.0746	0.01009	0.147
0.01361	0.10894	0.06976	0.0975
0.00798	0.00652	0.07478	0.0554
0.02222	0.01229	0.03382	0.00134
0.00111	0.02768	0.0243	0.000736
0.00403	0.04122	0.00493	0.0108
0.02593	0.0104	0.03467	0.00109
0.01339	0.14971	0.02647	0.081
0.01982	0.00267	0.02288	0.0158
0.0242	0.03399	0.11502	0.00963
0.02427	0.03298	0.01698	0.00174
0.00876	0.01163	0.04356	0.00665
0.00204	0.08856	0.02829	0.0764
0.01247	0.06053	0.00217	0.092
0.000452344	0.01278	0.00894	0.0572
0.00996	0.07592	0.00616	0.131
0.0043	0.03007	0.000233793	0.0711
0.00351	0.06567	0.00291	0.000411
0.0404	0.00050025	0.00613	0.00398
0.0267	0.01907	0.01403	0.0433
0.0116	0.000930683	0.00206	0.000638
0.00736	0.09115	0.01584	0.033
0.02273	0.00456	0.00415	0.019
0.06751	0.0018	0.00432	0.00585
0.02945	0.01774	0.02251	0.0252
0.02877	0.06803	0.04228	0.0257
0.00666	0.0077	0.09684	0.00792
0.05248	0.02701	0.00823	0.00334
0.08835	0.01936	0.00727	0.00555
0.01208	0.02099	0.00325	0.0129
0.10009	0.0983	0.00126	0.00568
0.00674	0.04918	0.03342	0.0613
0.0196	0.08968	0.00217	0.0101
0.01636	0.00402	0.03107	0.0054
0.03261	0.04401	0.05483	0.0288
0.10789	0.04877	0.03497	0.0262
0.00159	0.00664	0.00551	0.00474
0.0031	0.09019	0.00243	0.00331
0.00834	0.05939	0.00725	0.119
0.07395	0.05909	0.01381	0.0515
0.11664	0.00205	0.0347	0.021
0.00475	0.11761	0.06488	0.078
0.0289	0.0208	0.00923	0.000644
0.0522	0.03326	0.033	0.0361
0.07208	0.0222	0.00187	0.051
0.0198	0.03847	0.00123	0.0169
0.02438	0.01129	0.02634	0.0394
0.01139	0.00381	0.00348	0.0023
0.00125	0.0359	0.0072	0.0537
0.002	0.01169	0.01435	0.134
0.001	0.07697	0.0131	0.0092
0.00233	0.00896	0.10946	0.0285
0.00472	0.04606	0.11523	0.0386
0.00324	0.01902	0.00428	0.0156
0.02445	0.07413	0.00383	0.012
0.00767	0.02443	0.00105	0.159
0.1366	0.01627	0.01091	0.135
0.13747	0.02124	0.0376	0.0535
0.03026	0.13963	0.03273	0.0159
0.02976	0.06664	0.02269	0.102
0.00562	0.04219	0.01002	0.00018
0.00718	0.00595	0.0096	0.00665
0.11505	0.02765	0.01435	0.0283
0.0694	0.01911	9.6314e-05	0.00733
0.06856	0.08229	0.0059	0.00729
0.07686	0.09479	0.00262	0.00702
0.14299	0.00652	0.01773	0.0712
0.05125	0.05524	0.01414	0.00848
0.0113	0.05903	0.03493	0.0741
0.00165	0.07684	0.01654	0.024
0.00141	0.06297	0.00831	0.0167
0.00213	0.01137	0.01537	0.00376
0.0072	0.01148	0.00883	0.0219
0.01278	0.08912	0.00632	0.0787
0.01046	0.08873	0.04911	0.00317
0.00288	0.02111	0.00126	0.0317
0.01062	0.00871	0.00627	0.0236
6.34645e-05	0.00215	0.00897	0.064
0.01204	0.01182	0.02378	0.0865
0.01959	0.12378	0.01216	0.00481
0.06205	0.14389	0.00254	0.0573
0.00031613	0.00728	0.02693	0.0279
0.0482	0.02084	0.00552	0.071
0.00467	0.00955	0.02417	0.00356
0.00128	0.02186	0.00409	0.0114
0.00126	0.01889	0.00522	0.0964
0.01137	0.00782	0.0088	0.0216
0.00597	0.06503	0.00756	0.0064
0.11792	0.04442	0.03957	0.0109
0.04188	0.01507	0.00245	0.00748
0.00255	0.0618	0.00361	0.0061
0.01915	0.00693	0.00211	0.134
0.00711	0.02884	0.01209	0.0151
0.00169	0.01398	0.03046	0.0257
0.03908	0.03662	0.01318	0.0484
0.05551	0.00893	0.07482	0.00348
0.0934	0.01752	0.000173454	0.00106
0.00808	0.01039	0.08022	0.0404
0.00147	0.00452	0.02067	0.0259
0.00508	0.00015362	0.00772	0.0776
0.0011	0.0209	0.00248	0.0039
0.00653	0.05859	0.00343	0.0128
0.00166	0.09864	0.03059	0.0381
0.025	0.00998	0.03238	0.0295
0.05933	0.00636	0.02467	0.0229
0.02394	0.03378	0.01187	0.0222
0.03261	0.00599	0.00152	0.012
0.01052	0.05053	0.0091	0.0501
0.09573	0.00303	0.0462	0.0428
0.00186	0.02274	0.03866	0.00821
0.000723739	0.08965	0.00732	0.0195
0.05875	0.00686	0.00456	0.0113
0.04493	0.07973	0.000199488	0.0467
0.000727145	0.012	0.00916	0.052
0.000576634	0.14821	0.0503	0.014
0.02938	0.03788	0.00752	0.0297
0.0204	0.03773	0.04559	0.0379
0.00967	0.08922	0.00536	0.0975
0.00795	0.02338	0.00156	0.0268
0.02019	0.06776	0.03885	0.0169
0.00524	0.00852	0.00305	0.00527
0.06465	0.03392	0.0031	0.0856
0.04275	0.00423	0.05799	0.0591
0.12615	0.03246	0.0036	0.112
0.13068	0.12477	0.000329066	0.0798
0.05503	0.02513	0.01533	0.0187
0.01249	0.10845	0.000859333	0.0159
0.00872	0.01177	4.34753e-05	0.0425
0.00472	0.06685	0.01872	0.105
0.0028	0.08339	0.00992	0.0617
0.115	0.01386	0.056	0.0542
0.09568	0.04558	0.00955	0.0914
0.01749	0.00913	0.00808	0.0672
0.01166	0.08183	0.04464	0.0832
0.00672	0.03808	0.01054	0.00132
0.00114	0.0055	0.0049	0.00233
0.00305	0.000526312	0.000235391	0.00316
0.00232	0.08199	0.00211	0.0015
0.00265	0.06124	1.56776e-05	0.0139
0.00223	0.02814	0.00121	0.0121
0.00725	0.01598	0.00256	0.0382
0.00284	0.12564	0.01146	0.00429
0.00133	0.05531	0.00689	0.0895
0.00314	0.03549	0.02531	0.00259
0.01148	0.01346	0.00132	0.0246
0.00374	0.01026	0.00613	0.0671
0.05705	0.00971	0.02374	0.0251
0.01859	0.01034	0.01073	0.00608
0.0166	0.08074	0.0028	0.106
0.00538	0.00865	0.00815	0.0402
0.02646	0.01239	0.00848	0.0705
0.01974	0.00469	0.05768	0.114
0.00142	0.10507	0.00596	0.0597
0.00536	0.07748	0.00253	0.0248
0.00141	0.00134	0.00952	0.0102
0.01255	0.04916	0.000749659	0.025
0.10403	0.03052	0.04406	0.0663
0.05115	0.04139	0.00947	0.00179
0.00381	0.01796	0.00899	0.015
0.14614	0.02519	0.04136	0.0365
0.01087	0.00827	0.02603	0.0443
0.03085	0.000156939	0.03014	0.0631
0.03192	0.04279	0.00677	0.0204
0.00699	0.01519	0.0016	0.0367
0.00173	0.13774	0.02189	0.00514
0.00454	0.13811	0.0033	0.0175
0.00067373	0.04501	0.06525	0.0119
0.00905	0.03368	0.000162753	0.0538
0.02072	0.00386	0.000149421	0.0484
0.04846	0.10742	0.04141	0.0059
0.01937	0.12838	0.01713	0.0256
0.00055793	0.04239	2.3321e-06	0.0754
0.00253	0.10612	0.03451	0.155
0.02054	0.011	0.04188	0.00847
0.13579	0.05442	0.03668	0.0779
0.06475	0.01009	0.01939	0.000597
0.06462	0.02191	0.02674	0.0071
0.13661	0.02747	0.00533	0.0178
0.00708	0.02987	0.00133	0.108
0.1129	0.00418	0.01781	9.83e-05
0.01927	0.00127	0.01528	0.00843
0.02173	0.03683	0.03349	0.0225
0.0023	0.0054	0.15952	0.00533
0.000771942	0.02107	0.00207	1.39e-05
4.76424e-05	0.08752	0.00634	0.0914
0.01351	0.12863	0.00413	0.0164
0.02038	0.01502	0.10321	0.00277
0.00994	0.12872	0.01957	0.0185
0.00386	0.01965	0.04	0.0173
0.00615	0.054	0.00648	0.0673
0.00707	0.01262	0.01748	0.00801
0.00561	0.09512	7.7661e-06	0.0427
0.00261	0.02858	0.02585	0.0426
0.02327	0.01603	0.0071	0.0166
0.05866	0.01818	8.26825e-05	0.00692
0.01587	0.03503	0.1164	0.0163
0.01462	0.05707	0.09392	0.00591
0.03662	0.02133	0.00030056	0.00712
0.07802	0.07153	0.03421	0.00286
0.04413	0.03956	0.01498	0.011
0.00928	0.06215	0.04496	0.0221
0.01913	0.00839	0.00631	0.0393
0.00184	0.03364	0.02528	0.00577
7.12753e-05	0.00368	0.00151	0.00365
0.00588	0.00736	0.01793	0.02
0.00545	0.07218	0.01719	0.00108
0.00345	0.09608	0.02541	0.02
0.05768	0.14856	0.00334	0.0579
0.0021	0.0175	0.00336	0.0152
0.07602	0.03884	0.05705	0.00401
0.07028	0.00463	0.01406	0.00864
0.01656	0.0107	0.07017	0.0148
0.01573	0.00691	0.00389	0.0644
0.00692	0.0305	0.00121	0.108
0.00574	0.00708	0.01172	0.00754
0.01026	0.09558	0.0208	0.00168
0.00359	0.0578	0.00818	0.00321
0.01108	0.03895	0.00027311	0.0113
0.02587	0.12807	0.07094	0.135
0.01211	0.02932	0.00913	0.00846
0.02407	0.02573	0.00669	0.0148
0.00316	0.02479	0.07607	0.000527
0.00798	0.01998	0.01191	0.00514
0.00358	0.000284991	0.02331	0.0238
0.02582	0.00437	0.000583728	0.0386
0.01233	0.00206	0.00651	0.0328
0.0034	0.00997	0.00737	0.0736
0.000436449	0.06818	0.04158	0.0681
0.00557	0.01748	0.00039541	0.115
0.02308	0.05737	0.1478	0.051
0.02603	0.1182	0.04026	0.0112
0.03141	0.0584	0.05487	0.0284
0.04761	0.05581	0.01936	0.0655
0.01582	0.00523	0.000701865	0.000133
0.0279	0.00459	0.0144	0.0382
0.06562	0.0209	0.0545	0.000151
0.000305451	0.00565	0.04928	0.0137
0.00398	0.00805	0.000972676	0.0241
0.0067	0.00845	0.00194	0.0613
0.000274015	0.02114	0.08294	0.0347
0.00776	0.01309	0.06099	0.107
0.0069	0.01684	0.02367	0.0147
0.01897	0.01154	0.01074	0.00817
0.07774	0.00612	0.01213	0.000206
0.02701	0.0035	0.00929	0.017
0.04303	0.0441	0.01384	0.00889
0.00997	0.01174	0.02703	0.0151
0.00352	0.0188	0.04057	0.109
0.000584578	0.00745	0.000277483	0.012
0.00337	0.01459	0.00070374	0.00147
0.02696	0.00183	0.000870531	0.00068
0.01841	0.04095	0.00981	0.143
0.00025782	0.01979	0.00496	0.0459
0.00628	0.01481	0.0374	0.0896
0.000731811	0.01526	0.03603	0.138
0.01197	0.01367	0.00397	0.0144
0.02985	0.0051	0.01414	0.0314
0.000412434	0.000660755	0.02555	0.0459
0.00985	0.01214	0.03932	0.0154
0.01232	0.09335	0.01283	0.0302
0.05027	0.06109	0.08303	0.0535
0.00246	0.12223	0.00466	0.0523
0.00667	0.01559	0.00826	0.0379
0.03304	0.01745	0.0067	0.00786
0.00369	0.00956	0.00555	0.0452
0.00959	0.01173	0.01373	0.0237
0.00624	0.02291	0.00624	0.0272
0.00229	0.01034	0.0026	0.0157
0.00369	0.0179	0.000537194	0.00619
0.05422	0.14294	0.00163	0.124
0.01424	0.08242	0.00322	0.00504
0.05964	0.01495	0.06848	0.00167
0.00258	0.01987	0.00685	0.0324
0.01012	0.08694	0.00957	0.0201
0.00745	0.01625	0.00633	0.0476
0.00203	0.02225	0.00709	0.000549
0.0084	0.05397	0.00412	0.0442
0.03294	0.02485	0.00166	0.0705
0.01158	0.05645	0.04453	0.087
0.00312	0.03331	0.02722	0.0239
0.02474	0.03612	0.00458	0.0307
0.01192	0.00287	0.01737	0.0164
0.0012	0.00385	0.02049	0.0041
0.0255	0.09522	0.00581	0.0651
0.00136	0.03413	0.13707	0.0243
0.00987	0.08441	0.02214	0.0127
0.0061	0.01383	0.00187	0.0924
0.0217	0.04185	0.000278591	0.0105
0.07353	0.0307	0.0308	0.0429
0.02448	0.00421	0.03792	0.00209
0.01996	0.12723	0.03186	0.147
0.00445	0.00386	0.000590726	0.0575
0.01892	0.00785	0.00759	0.00385
0.04772	0.03162	0.00143	0.0201
0.01702	0.01122	0.000734263	0.0215
0.13633	0.07484	0.000134828	0.0746
0.05882	0.07787	0.01895	0.0808
0.03351	0.03111	0.04578	0.0485
0.01942	0.03443	0.00158	0.0137
0.01128	0.07623	0.08567	0.00859
0.0092	0.01021	0.00705	0.0407
0.00105	0.06506	0.02611	0.139
0.00341	0.0179	0.02052	0.00738
0.00166	0.02894	0.01678	0.0105
0.00635	0.04663	0.0017	0.0129
0.00563	0.00538	0.01279	0.0123
0.01172	0.07385	0.06248	0.103
0.00445	0.01381	0.02942	0.00716
0.00446	0.02959	0.0242	0.094
0.00478	0.0211	0.04927	0.0145
0.00559	0.03599	0.001	0.0999
0.00869	0.00645	0.01934	0.0578
0.04818	0.0687	0.00533	0.0054
0.00224	0.01626	0.04406	0.0264
0.0029	0.03282	0.00387	0.0027
0.00365	0.10342	0.06859	0.0238
0.0038	0.01051	0.03778	0.00225
7.63892e-05	0.07369	0.01474	0.00531
0.022	0.01533	0.000593853	0.0137
0.01617	0.06543	0.01013	0.0127
0.00731	0.00236	0.03064	0.0144
0.000998957	0.01178	0.06095	0.0119
0.04794	0.09639	0.00388	0.0143
0.00064416	0.11755	0.03685	0.0018
0.00425	0.00966	0.06635	0.0292
0.02205	0.04504	0.0572	0.0356
0.09083	0.04594	0.00342	0.00265
0.00621	0.02262	0.00711	0.0116
0.000146578	0.08001	0.00377	0.00222
0.03104	0.01436	0.07424	6.73e-05
0.04246	0.03305	0.03192	0.00541
0.01063	0.04514	0.00852	0.00128
0.0285	0.03033	0.00353	0.00308
0.00684	0.03493	0.13471	0.0531
0.01333	0.00374	0.04365	0.00377
0.00199	0.01993	0.08173	0.0258
0.01206	0.02389	0.00439	0.00041
0.000304191	0.00842	0.03892	0.0509
0.00104	0.00762	0.0177	0.0761
0.00371	0.03237	0.02004	0.0861
0.09761	0.15464	0.04988	0.0225
0.01284	0.02271	0.0447	0.00373
0.01206	0.05762	0.02286	0.0231
0.00593	0.06696	0.01142	0.0177
0.00111	0.10259	0.00829	0.00972
0.01579	0.02034	8.87365e-05	0.0542
0.05928	0.061	0.09534	0.0858
0.00369	0.04187	0.0461	0.0331
0.01646	0.00274	0.01864	0.0909
0.07613	0.07282	0.00238	0.00967
0.02852	0.01964	0.01968	0.00189
0.02647	0.00308	0.01081	0.143
0.00233	0.00512	0.04172	0.0445
0.00045796	0.03629	0.06839	0.00129
0.04152	0.01168	0.00589	3.83e-05
0.08605	0.08357	0.00837	0.0621
0.00357	0.10094	0.0014	0.041
0.01762	0.04769	0.00132	0.0398
8.621e-05	0.05517	0.00563	0.0053
0.00269	0.0039	0.04728	0.0257
0.05059	0.07109	0.05408	0.000441
0.02904	0.04159	0.00715	0.0282
0.00887	0.00466	0.01778	0.16
0.00676	0.09744	0.13854	0.036
0.05722	0.00711	0.15677	0.0213
0.09811	0.05743	0.00272	0.137
0.081	0.12073	0.000677915	0.0112
0.00863	0.07877	0.00188	0.0279
0.000907294	0.00877	0.00291	0.0288
0.06317	0.00554	0.00781	0.104
0.04847	0.01533	0.14335	0.0446
0.05541	0.0017	0.0027	8.76e-06
0.000322816	0.01259	0.00553	0.0369
0.00648	0.01386	0.00616	0.052
0.00415	0.00325	0.04173	0.0389
0.00682	0.02677	0.00159	0.00878
0.000128056	0.01658	0.04776	0.0845
0.02529	0.01959	0.06082	0.0623
0.000317352	0.03194	0.01214	0.00123
0.01084	0.02462	0.000113955	0.134
0.00635	0.03511	0.00245	0.0122
0.0017	0.10716	0.03484	0.0357
0.0114	0.00654	0.08378	0.134
0.00244	0.00793	0.02626	0.000678
0.03717	0.02547	0.00777	0.00116
0.00314	0.02146	0.00855	0.0222
0.08135	0.04311	0.04289	0.000486
0.03434	0.01754	0.10588	0.0192
0.03779	0.02756	0.00334	0.0465
0.13222	0.03375	0.00582	0.124
0.05657	0.02895	0.01653	0.129
0.02339	0.02436	0.00749	0.111
0.00718	0.02204	0.0103	0.000916
0.0117	0.03516	0.00334	0.0179
0.07313	0.01904	0.000602205	0.000229
0.000855156	0.05021	0.0148	0.0391
0.01846	0.11524	0.0288	0.081
0.00603	0.03591	0.12794	0.0515
7.56725e-05	0.08216	0.02129	0.000769
0.00689	0.00697	0.02081	0.124
0.01491	0.03058	0.08336	0.0113
0.00477	0.00216	0.03125	0.000338
0.00381	0.03693	0.06401	0.0201
0.00508	0.00703	0.02175	0.0845
0.00157	0.03699	0.02188	0.0433
0.04083	0.13032	0.00046162	0.00131
0.06846	0.0268	0.01293	0.032
0.00857	0.03773	0.00585	0.0278
0.02133	0.00743	0.00289	0.00223
0.00936	0.0826	0.00019122	0.00563
0.00337	0.0088	0.01022	0.00415
0.02231	0.07387	0.00214	0.000301
0.03764	0.07108	0.00291	0.0991
0.0074	0.04685	0.01495	0.0233
0.00646	0.11219	0.00759	0.0666
0.01394	0.0537	0.000231966	0.0314
0.05936	0.06674	0.02555	0.0415
0.04969	0.02185	0.02653	0.157
0.000979016	0.11221	0.00203	0.0273
0.00703	0.000906667	0.00415	0.0253
0.00544	0.03578	8.96557e-05	0.0243
0.00878	0.13062	0.14631	0.00246
0.03356	0.05531	0.06195	0.00451
0.00888	0.01283	0.0467	0.00208
0.06969	0.00441	0.05113	0.00683
0.11958	0.10494	0.03819	0.0293
0.00868	0.01318	0.00236	0.00707
0.00815	0.0288	0.01061	0.0109
0.00878	0.04181	0.00993	0.00398
0.00727	0.00574	0.05361	0.0488
0.05526	0.01822	0.12927	0.00593
0.0217	0.12605	0.08684	0.0314
0.03874	0.00322	0.01117	0.00119
0.04821	0.05359	0.00607	0.0415
0.03408	0.10847	0.03045	0.00981
0.00381	0.00646	0.11096	0.00894
0.00687	0.11102	0.00157	0.109
0.02489	0.05127	0.00077265	0.02
0.02685	0.06109	0.00343	0.103
0.03839	0.0349	0.08249	0.0112
0.01777	0.11215	0.00527	0.0286
0.0247	0.00706	0.04316	0.0565
0.02704	0.03243	0.01608	0.0538
0.01694	0.00388	0.02002	0.0331
0.01293	0.01757	0.00666	0.00525
0.04566	0.01182	0.000499017	0.0477
0.03089	0.01074	0.02235	0.00165
0.11459	0.00573	0.01346	0.0521
0.02296	0.000748009	0.00404	0.0301
0.00335	0.04685	0.0012	0.0011
0.000657571	0.03332	0.06574	4.95e-05
0.00157	0.06408	0.00621	0.0655
0.01203	0.00802	0.00281	0.142
0.00394	0.00737	0.02163	0.091
0.00184	0.02056	0.05274	0.0627
0.000826114	0.00102	0.00855	0.0999
0.01507	0.02174	0.00231	0.003
0.00197	0.00842	0.00651	0.0267
0.01027	0.0069	0.01987	0.145
0.01466	0.03672	0.01982	0.00157
0.01004	0.00885	0.03419	0.0534
0.02863	0.000311555	0.00858	0.0139
0.00276	0.01702	0.10326	4.78e-05
0.00138	0.00486	0.01322	0.00461
0.00436	0.05183	0.02395	0.00086
0.05439	0.07268	0.04836	0.00384
0.04909	0.000903443	0.1056	0.144
0.01337	0.05897	0.00349	0.0777
0.000609261	0.09876	0.02695	0.148
0.00596	0.06724	0.00226	0.0186
0.0064	0.02071	0.10421	0.0258
0.000665824	0.02982	0.02843	0.00181
0.01484	0.0137	0.0102	0.00195
0.0084	0.0937	0.02389	0.0281
0.00207	0.02325	0.02744	0.145
0.00223	0.03562	0.0037	0.034
0.01959	0.00024631	0.01325	0.0482
0.00475	0.01601	0.02168	0.0537
0.01337	0.01378	0.0044	0.0303
0.01328	0.00842	0.00989	0.0356
0.07882	0.04558	0.00108	0.0389
0.01885	0.05895	0.02646	0.00268
0.04834	0.01093	0.02866	0.0614
0.01107	0.05708	0.03216	0.00254
0.01393	0.04009	0.00551	0.00848
0.05589	0.00258	0.0099	0.0301
0.0049	0.00481	0.0019	0.00861
0.02623	0.01845	0.09169	0.0254
0.00211	0.0247	0.00374	0.105
0.03024	0.000408959	0.02454	0.0799
0.00396	0.08044	0.03235	0.00293
0.00299	0.13801	0.00298	0.0432
0.01808	0.11027	0.01523	0.0268
0.00827	0.00735	0.01327	0.00682
0.05627	0.01589	0.01309	0.00702
0.00414	0.00143	0.02645	0.00124
0.01519	0.06091	0.09474	0.00187
0.02143	0.04539	0.0266	0.011
0.01449	0.00974	0.01705	0.0119
0.000556802	0.00275	0.00529	0.00443
0.01428	0.00732	0.01904	0.101
0.04902	0.02511	0.01207	0.0415
0.000831874	0.04789	0.02723	0.00824
0.09691	0.04631	0.07064	0.027
0.03369	0.00507	0.01049	0.0162
0.02567	0.01828	0.03591	0.0832
0.00462	0.0124	0.00192	0.0776
0.00221	0.0257	0.00132	0.00418
0.00183	0.0055	5.26601e-05	0.026
0.00888	0.01642	0.000735954	0.111
0.0008605	0.09888	0.0037	0.076
0.00634	0.00342	0.08913	0.0761
0.00608	0.00117	0.01043	0.0453
0.00445	0.02465	0.09369	0.0747
0.01541	0.04551	0.04205	0.0953
0.00714	0.07004	0.03883	0.0172
0.000570543	0.07951	0.0264	0.0926
0.00605	0.01512	0.000767915	0.00403
0.03493	0.04517	0.01119	0.0159
0.01379	0.05855	0.07691	0.0478
0.09196	0.01043	0.14365	0.0242
0.06812	0.05749	0.02981	0.0338
0.0761	0.0436	0.01741	0.0287
0.01109	0.13807	0.03853	0.0411
0.00559	0.067	0.00671	0.0225
0.0048	0.00501	0.02079	0.0126
0.00214	0.07319	0.01957	0.0193
0.00719	0.04785	0.04628	0.00221
5.72904e-05	0.00764	0.00958	0.104
0.0022	0.00578	0.02065	0.0022
0.00521	0.04987	0.01471	0.00298
0.05636	0.09799	0.00648	0.034
0.00912	0.06587	0.009	0.067
0.05379	0.05096	0.01061	0.051
0.04178	0.02201	0.14785	0.051
0.01435	0.000674849	0.02397	0.0446
0.00375	0.00624	0.00687	0.0575
0.00282	0.000434428	0.02755	0.00975
0.00214	0.00715	0.03805	0.042
0.00201	0.10815	0.02212	0.05
0.00322	0.15258	0.00258	0.0644
0.01182	0.10167	0.00384	0.00719
0.000153002	0.04323	0.00133	0.0187
0.01809	0.02055	0.00828	0.0929
0.01337	0.07964	0.06465	0.0113
0.00531	0.02013	0.06229	0.0468
0.00058617	0.04215	0.03954	0.0305
0.09954	0.03249	0.03417	0.0316
0.05912	0.00889	0.03141	0.106
0.11604	0.04099	0.05792	0.117
0.01453	0.04943	0.00204	0.00501
0.01153	0.00732	0.01056	0.0197
0.02674	0.02351	0.01008	0.0163
0.09643	0.01674	0.05355	0.0495
0.00369	0.00092715	0.00266	0.0982
0.03525	0.03497	0.00166	0.0119
0.06143	0.02692	0.00554	0.033
0.01243	0.04024	0.00353	0.0184
0.00356	0.00129	0.00052306	0.038
0.00909	0.14195	0.00113	0.0576
0.00956	0.03468	0.00111	0.00224
0.00451	0.13883	0.000403416	0.00123
0.00621	0.000615723	0.11865	0.0143
0.00361	0.04651	0.0152	0.00191
0.00506	0.00937	0.09325	0.00468
0.000779418	0.02709	0.01926	0.112
0.01618	0.0994	0.00631	0.0569
0.05801	0.02968	0.02296	0.00709
0.02486	0.09169	0.01834	0.00246
0.12602	0.08326	0.00794	0.0362
0.15421	0.03403	0.01255	0.0916
0.0833	0.02456	0.04805	0.0507
0.0078	0.00168	0.01637	0.00104
0.02996	0.04598	0.0199	0.0142
0.00308	0.01015	0.0294	0.000275
0.09293	0.00437	0.0016	0.0346
0.01517	0.02613	0.01593	0.0807
0.00203	0.03729	0.00345	0.00122
0.01411	0.03573	0.00777	0.00224
0.00329	0.14226	0.00713	0.000724
0.00497	0.04674	0.00761	0.0427
0.01353	0.00155	0.0145	0.0174
0.03299	0.00922	0.00052982	0.00029
0.03045	0.00285	0.15348	0.0509
0.0023	0.01474	0.01334	0.00811
0.01935	0.02959	0.02795	0.107
0.00499	0.01987	0.02488	0.0073
0.03001	0.0029	0.03771	0.00256
0.08224	0.03638	0.02008	0.00706
0.00164	0.01945	0.10571	0.0115
0.000446043	0.01884	0.10675	0.138
0.00861	0.03023	0.02642	0.131
0.11756	0.02344	0.01729	0.00826
0.00581	0.15938	0.000556197	0.0641
0.00275	0.05428	0.00351	0.0836
0.00644	0.00391	0.01013	0.0195
0.00147	0.00661	0.01638	0.0684
0.12088	0.01511	0.02938	0.0233
0.0814	0.01796	0.0658	0.0719
0.02556	0.00544	0.03141	0.000679
0.04828	0.02794	0.0174	0.000748
0.04106	0.00207	0.00075522	0.0573
0.0075	0.0043	0.02822	0.0143
0.13346	0.02975	0.0018	0.0321
0.12879	0.00372	0.00507	0.0705
7.25657e-05	0.01132	0.03415	0.0842
[truncated: 158,393 more rows]

## Sheet: panel d
CDF D (µm2/s)	MSD D (µm2/s)
3.00567	1.85612
3.09176	1.87079
3.38803	1.97368
3.51382	2.0905
3.53498	2.07985
3.55565	2.25748
3.64216	2.25107
3.68794	2.24588
3.72772	2.27193
3.73858	2.20022
3.91229	2.44113
4.02052	2.58634
4.05103	2.6326
4.06699	2.60126
4.07531	2.4273
4.09496	2.5134
4.11325	2.41402
4.18885	2.67362
4.20532	2.49168
4.70987	2.8694
4.84985	2.84051
4.88083	2.99681
4.91521	3.42544
4.92169	3.18663
5.03079	3.3102
5.03335	2.60083
5.16211	3.47369
5.2647	3.30959
5.45562	3.57398
5.48604	3.74979
5.69228	3.65712
5.79859	3.78142
5.89845	3.95007
5.93297	3.67171
5.93369	3.97732
5.94682	3.76072
5.97901	3.7847
5.98225	3.96687
5.99125	3.85591
6.06888	3.07303
6.10559	3.79522
6.11501	3.90133
6.31283	4.05546
6.39748	4.03346
6.45174	4.03969
6.48422	4.36662
6.5318	4.15708
6.58654	3.99104
6.68529	4.34423
6.69717	4.00342
6.74596	4.17153
7.03855	4.48551
7.09041	4.58956
7.14074	4.74029
7.17673	5.0951
7.29682	4.91658
7.34103	4.67652
7.64049	5.04384
7.77804	5.26177
7.89976	5.14208
8.04275	5.34698
8.06292	5.16306
8.10552	5.15867
8.13866	5.04429
8.17883	5.58913
8.38161	5.26264
8.44586	5.47064
8.49673	5.58913
8.83976	5.68948
9.02798	5.77339
9.09975	5.69802
9.24646	6.0072
