# Supplementary material for: Dynamic interactions between the RNA chaperone Hfq, small regulatory RNAs, and mRNAs in live bacterial cells
Source: eLife. 2021 Feb 22;10:e64207. doi: 10.7554/eLife.64207 (PMC7987339; doi:10.7554/eLife.64207)
Supplement: Figure 2—source data 1. [file elife-64207-fig2-data1.xlsx]

## Sheet: Sheet1
	Repeats	Time=0 s	Time 0.00576 s	Time 0.01152 s	Time 0.01728 s	Time 0.02304 s	num of cells	num of traces
No Treatment	R1	0	0.0171836	0.0315331	0.0433562	0.0550608	144	6733
	R2	0	0.0168313	0.0315683	0.0439727	0.0556074	111	4414
	R3	0	0.0166635	0.0319	0.0449409	0.0579083	103	5740
	Average	0	0.0168928	0.0316671	0.0440899	0.0561922
	standard deviation	0	0.000216724	0.000165258	0.00065223	0.00123384
Rifampicin	R1	0	0.0324382	0.0643799	0.093578	0.120506	98	3438
	R2	0	0.0314916	0.061879	0.0891013	0.11447	117	6190
	Average	0	0.0319649	0.0631295	0.0913397	0.117488
	standard deviation	0	0.000473282	0.00125045	0.00223836	0.00301829
