# Supplementary material for: Dynamic interactions between the RNA chaperone Hfq, small regulatory RNAs, and mRNAs in live bacterial cells
Source: eLife. 2021 Feb 22;10:e64207. doi: 10.7554/eLife.64207 (PMC7987339; doi:10.7554/eLife.64207)
Supplement: Figure 3—figure supplement 1—source data 1. [file elife-64207-fig3-figsupp1-data1.xlsx]

## Sheet: Fig3supp1_raw-data
Figure 3, supplementary figure 1a (ptsG + Hfq)
	R1
	Background :	1870000
	# sample	Hfq (nM)	Unbound	Unbound - bckgrnd	Bound	Bound - bckgrnd	Ratio Bound / Total
	1	0	25200000	23330000	4550000	2680000	0.103037
	2	60	24000000	22130000	8970000	7100000	0.242901
	3	80	21400000	19530000	13000000	11130000	0.363014
	4	100	15800000	13930000	17600000	15730000	0.530344
	5	110	15200000	13330000	16100000	14230000	0.516328
	6	120	9980000	8110000	21600000	19730000	0.708693
	7	130	13100000	11230000	20100000	18230000	0.618805
	8	140	7520000	5650000	22800000	20930000	0.787434
	9	160	5540000	3670000	24100000	22230000	0.858301
	10	200	3510000	1640000	22900000	21030000	0.927658
	R2
	Background :	1370000
	# sample	Hfq (nM)	Unbound	Unbound - bckgrnd	Bound	Bound - bckgrnd	Ratio Bound / Total
	1	0	26300000	24930000	1370000	0	0
	2	60	25300000	23930000	11100000	9730000	0.289067
	3	80	22700000	21330000	15100000	13730000	0.391614
	4	100	19100000	17730000	20000000	18630000	0.512376
	5	110	15900000	14530000	20000000	18630000	0.561821
	6	120	12000000	10630000	21600000	20230000	0.655541
	7	130	12200000	10830000	21500000	20130000	0.650194
	8	140	7240000	5870000	24500000	23130000	0.797586
	9	160	4410000	3040000	26900000	25530000	0.893595
	10	200	2690000	1320000	23200000	21830000	0.942981
Figure 3, supplementary figure 1b (RyhB + Hfq)
	R1
	Background :	3140000
	# sample	Hfq (nM)	Unbound	Unbound - bckgrnd	Bound	Bound - bckgrnd	Ratio Bound / Total
	1	0	33500000	30360000	5330000	2190000	0.0672811
	2	40	32700000	29560000	9510000	6370000	0.177289
	3	60	26500000	23360000	11600000	8460000	0.265871
	4	80	27400000	24260000	15900000	12760000	0.344679
	5	100	16600000	13460000	18400000	15260000	0.531337
	6	110	16400000	13260000	18800000	15660000	0.541494
	7	120	14200000	11060000	21100000	17960000	0.618884
	8	140	10900000	7760000	22500000	19360000	0.713864
	9	160	10200000	7060000	23400000	20260000	0.741581
	10	200	6640000	3500000	27600000	24460000	0.874821
	R2
	Background :	3660000
	# sample	Hfq (nM)	Unbound	Unbound - bckgrnd	Bound	Bound - bckgrnd	Ratio Bound / Total
	1	0	40000000	36340000	6090000	2430000	0.0626773
	2	40	36700000	33040000	11000000	7340000	0.181773
	3	60	32500000	28840000	12800000	9140000	0.240653
	4	80	27400000	23740000	15600000	11940000	0.334641
	5	100	18900000	15240000	18600000	14940000	0.49503
	6	110	15200000	11540000	22800000	19140000	0.623859
	7	120	12200000	8540000	26900000	23240000	0.731278
	8	140	10700000	7040000	26600000	22940000	0.765177
	9	160	8600000	4940000	26600000	22940000	0.822812
	10	200	5730000	2070000	31900000	28240000	0.931706
Figure 3, supplementary figure 1c (ChiX + Hfq)
	R1
	Background :	1610000
	# sample	Hfq (nM)	Unbound	Unbound - bckgrnd	Bound	Bound - bckgrnd	Ratio Bound / Total
	1	0	22500000	20890000	3160000	1550000	0.0690731
	2	20	22300000	20690000	4690000	3080000	0.129575
	3	40	20300000	18690000	8140000	6530000	0.258921
	4	60	18600000	16990000	10100000	8490000	0.333203
	5	80	14300000	12690000	10700000	9090000	0.417355
	6	100	7390000	5780000	13800000	12190000	0.678353
	7	120	6550000	4940000	13800000	12190000	0.711617
	8	140	5050000	3440000	17300000	15690000	0.820178
	9	160	4640000	3030000	17400000	15790000	0.839001
	10	200	5800000	4190000	17600000	15990000	0.792369
	R2
	Background :	1680000
	# sample	Hfq (nM)	Unbound	Unbound - bckgrnd	Bound	Bound - bckgrnd	Ratio Bound / Total
	1	0	24700000	23020000	3140000	1460000	0.0596405
	2	20	25000000	23320000	5790000	4110000	0.149836
	3	40	21000000	19320000	8530000	6850000	0.26175
	4	60	17100000	15420000	10600000	8920000	0.366475
	5	80	14300000	12620000	13900000	12220000	0.491948
	6	100	8840000	7160000	14800000	13120000	0.646943
	7	120	5880000	4200000	15800000	14120000	0.770742
	8	140	5010000	3330000	15600000	13920000	0.806957
	9	160	4530000	2850000	15600000	13920000	0.830054
	10	200	3870000	2190000	16800000	15120000	0.873484
