# Supplementary material for: Dynamic interactions between the RNA chaperone Hfq, small regulatory RNAs, and mRNAs in live bacterial cells
Source: eLife. 2021 Feb 22;10:e64207. doi: 10.7554/eLife.64207 (PMC7987339; doi:10.7554/eLife.64207)
Supplement: Figure 3—figure supplement 2—source data 1. [file elife-64207-fig3-figsupp2-data1.xlsx]

## Sheet: Sheet1
			Repeats
Hfq	sRNA overexpression		R1	number of cells in R1	R2	number of cells in R2	AVERAGE	STD
WT	RyhB	-	1127.02	424	1285.19	1221	1206.1	79.0893
		+	3512.14	701	6543.89	1466	5028.01	1515.87
	SgrS	-	1210.33	833	1327.53	1298	1268.93	58.6026
		+	13154.9	884	14645.4	1488	13900.2	745.262
	ChiX	-	1224.21	574	1252.43	593	1238.32	14.1087
		+	2115.36	561	2177.52	658	2146.44	31.0774
	ChiXΔAANx1	+	1664.44	1409	2540.02	2106	2102.23	437.789
	ChiXΔAANx2	+	1881.46	1113	2147.53	799	2014.49	133.036
Q8A	ChiX	+	1770.67	690	2021.75	658	1896.21	125.54
