# Supplementary material for: Dynamic interactions between the RNA chaperone Hfq, small regulatory RNAs, and mRNAs in live bacterial cells
Source: eLife. 2021 Feb 22;10:e64207. doi: 10.7554/eLife.64207 (PMC7987339; doi:10.7554/eLife.64207)
Supplement: Figure 3—source data 1. [file elife-64207-fig3-data1.xlsx]

## Sheet: Sheet1
Conditions : EZ Rich medium, 0.2% fructose, Induction 1mM IPTG at OD=0.1
													Data used for "absolute" GraphPad												Data used for "relativized" GraphPad
					Copies / μl								Copies / μl normalized to 16S												Relativised to mean of control (empty vector)
					16S		ChiX		RyhB		SgrS		ChiX				RyhB				SgrS				ChiX		RyhB		SgrS
	Hfq background	Strain	Plasmid	Sample	R1	R2	R1	R2	R1	R2	R1	R2	R1	R2			R1	R2			R1	R2			R1	R2	R1	R2	R1	R2
	WT	KP2247	pET15b-chiX	1	1.23596e+07	2.26181e+07	4281.45	5142.87	5.33746	6.60993	29.9631	35.2679	0.000346407	0.000227379	0.000286893	8.41657e-05	4.31847e-07	2.92241e-07	3.62044e-07	9.87165e-08	2.42427e-06	1.55928e-06	1.99178e-06	6.11643e-07	32.7349	21.4869	0.610677	0.413259	0.446451	0.287155
	Q8A	KP2248	pET15b-chiX	2	1.02266e+07	1.36305e+07	5753.11	6139	5.80974	5.98714	18.2378	18.1629	0.000562566	0.000450386	0.000506476	7.93231e-05	5.68103e-07	4.39245e-07	5.03674e-07	9.11168e-08	1.78337e-06	1.33252e-06	1.55794e-06	3.18801e-07	53.1615	42.5607	0.803357	0.621138	0.328423	0.245395
	WT	KP2250	pET15b-chiX∆1	3	1.24925e+07	1.11516e+07	2344.35	2039.59	8.00403	8.26393	36.469	30.5933	0.000187661	0.000182896	0.000185278	3.36972e-06	6.40709e-07	7.4105e-07	6.90879e-07	7.09519e-08	2.91929e-06	2.74338e-06	2.83133e-06	1.24381e-07	17.7337	17.2833	0.906028	1.04792	0.537611	0.505218
	WT	KP2251	pET15b-chiX∆2	4	1.22966e+07	1.25517e+07	3860.62	4940.19	5.5273	6.89605	32.0551	31.2993	0.000313959	0.000393589	0.000353774	5.63067e-05	4.49498e-07	5.49413e-07	4.99456e-07	7.06505e-08	2.60683e-06	2.49364e-06	2.55023e-06	8.00395e-08	29.6686	37.1934	0.635637	0.776927	0.48007	0.459225
	WT	KP2245	pET15b-ryhB	5	1.6479e+07	1.29342e+07	78.6539	100.279	728.971	498.181	31.6453	27.1132	4.77297e-06	7.75297e-06	6.26297e-06	2.10718e-06	4.42363e-05	3.85165e-05	4.13764e-05	4.04451e-06	1.92034e-06	2.09624e-06	2.00829e-06	1.2438e-07	0.451037	0.732642	62.5547	54.4663	0.353647	0.38604
	WT	KP2252	pET15b-sgrS	6	1.25144e+07	6.52835e+06	78.3382	76.8407	7.25436	5.61562	66760.5	35279.3	6.25984e-06	1.17703e-05	9.01507e-06	3.89649e-06	5.79681e-07	8.6019e-07	7.19935e-07	1.9835e-07	0.00533469	0.00540401	0.00536935	4.90175e-05	0.591544	1.11227	0.819729	1.2164	982.428	995.194
	WT	KP2254	pET15b Control	7	1.15723e+07	8.18861e+06	125.337	84.6185	7.92766	5.97171	76.0716	35.1016	1.08307e-05	1.03337e-05	1.05822e-05	3.51461e-07	6.85053e-07	7.29271e-07	7.07162e-07	3.12668e-08	6.57357e-06	4.28664e-06	5.4301e-06	1.61711e-06	1.02348	0.976515	0.968736	1.03126	1.21058	0.789421
