# Supplementary material for: Dynamic interactions between the RNA chaperone Hfq, small regulatory RNAs, and mRNAs in live bacterial cells
Source: eLife. 2021 Feb 22;10:e64207. doi: 10.7554/eLife.64207 (PMC7987339; doi:10.7554/eLife.64207)
Supplement: Figure 4—source data 1. [file elife-64207-fig4-data1.xlsx]

## Sheet: Sheet1
		D (µm2/s)				mRNA-associated fraction
		NT		Rif		NT		Rif
		avg	std	avg	std	avg	std	avg	std
WT hfq	wt rne	2.53047	0.04959	5.22104	0.17811	0.56556	0.01049	0.11085	0.03503
	rne131	2.39406	0.24213	4.05051	0.0925	0.6103	0.04711	0.24203	0.00769
	rne d14	2.3435	0.13806	3.96739	0.09343	0.61104	0.02381	0.27115	0.01508
Q8A	wt rne	1.96799	0.1582	5.3739	0.30438	0.69627	0.04936	0.06299	0.00955
	rne131	2.07136	0.28365	3.72821	0.0799	0.66842	0.05893	0.305	0.00634
	rne d14	2.08695	0.16019	3.44271	0.35521	0.65595	0.03285	0.34737	0.07432
Y25D	wt rne	4.35358	0.54689	5.3662	0.14769	0.22592	0.09829	0.09279	0.03038
	rne131	4.03892	0.27964	4.86041	0.26005	0.27241	0.04515	0.13153	0.04687
	rne d14	4.09962	0.30928	5.21285	0.07041	0.2516	0.0394	0.08861	0.01438
