# Supplementary material for: Dynamic interactions between the RNA chaperone Hfq, small regulatory RNAs, and mRNAs in live bacterial cells
Source: eLife. 2021 Feb 22;10:e64207. doi: 10.7554/eLife.64207 (PMC7987339; doi:10.7554/eLife.64207)
Supplement: Figure 5—source data 1. [file elife-64207-fig5-data1.xlsx]

## Sheet: mRNA half-lives
			k (decay rate)	tau (half-life)	<tau>, std		k (decay rate)	tau (half-life)	<tau>, std		k (decay rate)	tau (half-life)	<tau>, std		k (decay rate)	tau (half-life)	<tau>, std		k (decay rate)	tau (half-life)	<tau>, std		k (decay rate)	tau (half-life)	<tau>, std
sodB	R1	WT hfq/WT rne	0.07572	3.97557	3.99106	Y25D hfq/WT rne	0.05285	5.69593	5.87717	Q8A hfq/WT rne	0.06094	4.93978	4.97468	WT hfq/rne131	0.0464	6.48772	7.37537	Y25D hfq/rne131	0.03668	8.20692	8.13523	Q8A hfq/ rne 131	0.04435	6.7876	7.06467
	R2		0.06153	4.89241	0.659905		0.04425	6.80294	0.662665		0.06166	4.8821	0.347561		0.0365	8.2474	1.3614		0.02949	10.2079	1.48971		0.04487	6.70894	0.63983
	R3		0.09059	3.32299			0.05209	5.77904			0.0552	5.45344			0.03421	8.79947			0.04367	6.89329			0.03752	8.02319
	R4		0.07978	3.77325			0.05755	5.23076			0.06511	4.62341			0.05045	5.9669			0.04162	7.23282			0.04467	6.73897
ompX	R1	WT hfq/WT rne	0.09428	3.19294	2.94131	Y25D hfq/WT rne	0.07146	4.21257	4.62363	Q8A hfq/WT rne	0.08337	3.61077	3.4159	WT hfq/rne131	0.04029	7.47158	7.10815	Y25D hfq/rne131	0.04573	6.58277	6.6878	Q8A hfq/ rne 131	0.04932	6.10361	7.02735
	R2		0.12028	2.50274	0.552546		0.06801	4.42626	0.488101		0.09975	3.01784	0.286992		0.03808	7.9052	0.738374		0.04087	7.36555	1.04329		0.0607	4.95931	1.86812
	R3		0.08358	3.6017			0.0665	4.52677			0.08867	3.39495			0.04843	6.21578			0.03988	7.5484			0.03827	7.86595
	R4		0.12198	2.46786			0.05649	5.32891			0.0827	3.64002			0.04401	6.84004			0.05729	5.25449			0.03279	9.18054
sdhC	R1	WT hfq/WT rne	1.31881	0.228259	0.257025	Y25D hfq/WT rne	0.56849	0.529526	0.577472	Q8A hfq/WT rne	0.78499	0.373596	0.371646	WT hfq/rne131	0.30994	0.971252	0.958077	Y25D hfq/rne131	0.23212	1.29687	1.04653	Q8A hfq/ rne 131	0.26234	1.14748	0.969387
	R2		1.07324	0.280487	0.0228813		0.55921	0.538313	0.070638		0.77115	0.390365	0.0148307		0.23231	1.29581	0.244164		0.27209	1.10636	0.223967		0.23949	1.25696	0.273859
	R3		1.20303	0.250227			0.44164	0.681619			0.81781	0.368093			0.36639	0.821611			0.39764	0.757042			0.39126	0.769386
	R4		1.11854	0.269128			0.53714	0.560431			0.8491	0.354528			0.40481	0.743633			0.29345	1.02583			0.42777	0.703719
