# Supplementary material for: Dynamic interactions between the RNA chaperone Hfq, small regulatory RNAs, and mRNAs in live bacterial cells
Source: eLife. 2021 Feb 22;10:e64207. doi: 10.7554/eLife.64207 (PMC7987339; doi:10.7554/eLife.64207)
Supplement: Figure 6—source data 1. [file elife-64207-fig6-data1.xlsx]

## Sheet: mRNA half-lives
			k (decay rate)	tau (half-life)	<tau>, std		k (decay rate)	tau (half-life)	<tau>, std		k (decay rate)	tau (half-life)	<tau>, std
(a) sdhC	R1	ΔrppH	0.5208	0.578015	0.666771	Y25D hfq/ΔrppH	0.27002	1.11484	1.28508
	R2		0.45921	0.655539	0.0948727		0.23928	1.25807	0.185223
	R3		0.3926	0.76676			0.20308	1.48232
(b) sdhC	R1	pET15 ctrl	1.62495	0.185255	0.233252	WT ChiX	0.73201	0.411238	0.396925	ChiX ΔAANx2	0.92699	0.324739	0.281709
	R2		1.1751	0.256174	0.0415803		0.76686	0.392549	0.0127033		0.92953	0.323852	0.0737642
	R3		1.16531	0.258326			0.77788	0.386988			1.53169	0.196535
	R4		1.27545	0.236019			0.86699	0.347213			1.41467	0.212792
