# Supplementary material for: Dynamic interactions between the RNA chaperone Hfq, small regulatory RNAs, and mRNAs in live bacterial cells
Source: eLife. 2021 Feb 22;10:e64207. doi: 10.7554/eLife.64207 (PMC7987339; doi:10.7554/eLife.64207)
Supplement: Supplementary file 1. [file elife-64207-supp1.xlsx]

## Sheet: sheet
Supplementary file 1. List of all tracking data sets used to extract mRNA-associated fractions in this study
		P1	D1(um2/s)	P2	D2(um2/s)	weighted average	ensembe D from MSD (linear)	num of traces (CDF)	num of traces (MSD)	num of cells	<P2>,std	<CDF D>	<MSD D>	<faster D>	<slower D>	<osd speed_1>	<osd speed_2>	<osd2_1>	<osd2_2>
				P2 (=1-P1) is considered mRNA-associated fraction							std	std	std	std	std	std	std	std	std
WT Hfq, Rif	R1
	400 nm cutoff
	no costraint	0.91392	8.72224	0.08608	0.82856	8.04275	5.34698	21253	3438	98
	R2										0.11085	7.60974	5.22104	8.43874	0.88436	38.2707	12.3847	0.0486071	0.00509391
	400 nm cutoff										0.0350301	0.612369	0.178106	0.40093	0.0789131	0.909388	0.553108	0.00230935	0.00045454
	no costraint	0.86438	8.15524	0.13562	0.94016	7.17673	5.0951	28156	6190	117
Distal mutant, Rif	Y25D
	R1
	400 nm_cutoff										0.09279	8.11195	5.36621	8.8517	0.82522	39.1993	11.9638	0.0509858	0.00475327
	no costraint	0.88573	8.66848	0.11427	0.87604	7.77804	5.26177	39597	8737	89	0.0303773	0.472223	0.147693	0.259112	0.0718703	0.573795	0.52147	0.00149249	0.000413973
	R2
	400 nm_cutoff
	no costraint	0.92869	9.03492	0.07131	0.7744	8.44586	5.47064	25959	4238	97
	K31A
	R1
	400 nm_cutoff
	no costraint	0.91763	8.53256	0.08237	0.85016	7.89976	5.14208	22912	4459	64	0.052085	8.49976	5.42005	8.91064	0.73528	39.3229	11.2636	0.0513253	0.00423521
	R2										0.0428295	0.848521	0.393109	0.534686	0.162465	1.18032	1.25207	0.00307979	0.000935798
	400 nm_cutoff
	no costraint	0.9782	9.28872	0.0218	0.6204	9.09975	5.69802	22633	3388	81
Proximal mutant, Rif	Q8A
	R1
	400 nm_cutoff
	no costraint	0.93916	8.659	0.06084	0.76668	8.17883	5.58913	28005	5280	98	0.06529	8.14217	5.3739	8.6579	0.75932	38.7699	11.4814	0.0498695	0.00437368
	R2										0.00629325	0.0518414	0.304381	0.00155563	0.0104086	0.00348305	0.0786945	8.96046e-06	5.99536e-05
	400 nm_cutoff
	no costraint	0.93026	8.6568	0.06974	0.75196	8.10552	5.15867	17868	3009	69
	F42A
	R1
	400 nm_cutoff
	no costraint	0.86876	8.25728	0.13124	0.93896	7.29682	4.91658	15017	2539	63	0.1241	7.46866	4.98021	8.3925	0.94046	38.1698	12.7779	0.0483408	0.00541705
	R2										0.0100975	0.243008	0.0899864	0.19123	0.00212132	0.434894	0.014411	0.00110148	1.22188e-05
	400 nm_cutoff
	no costraint	0.88304	8.52772	0.11696	0.94196	7.64049	5.04384	25266	4903	65
Rim mutant, Rif	R16A
	R1
	400 nm_cutoff
	no costraint	0.94715	8.93072	0.05285	0.719	8.49673	5.58913	26541	5683	84	0.036675	8.87159	5.79817	9.17932	0.64752	39.9167	10.5865	0.0528729	0.00372972
	R2										0.0228749	0.530136	0.29562	0.351573	0.101088	0.764556	0.828889	0.00202506	0.000582267
	400 nm_cutoff
	no costraint	0.9795	9.42792	0.0205	0.57604	9.24646	6.0072	28458	4828	97
	R19D
	R1
	400 nm_cutoff
	no costraint	0.96221	9.161	0.03779	0.66032	8.83976	5.68948	43770	8372	101	0.033845	8.93387	5.73143	9.2242	0.63574	40.0176	10.5038	0.0531314	0.00366186
	R2										0.00557907	0.133092	0.0593333	0.0893783	0.0347614	0.193878	0.287274	0.000514819	0.000200225
	400 nm_cutoff
	no costraint	0.9701	9.2874	0.0299	0.61116	9.02798	5.77339	37726	7279	68
						For D1 constraints
						Average D1 for Rif cases	std D1 for Rif cases		Range: <d1>±2*std<d1>
						8.80786	0.391454		8.02495	9.59077
						Coresponding osd2 for fast population of Rif cases
						0.0507333
WT Hfq, NT	R1
	400 nm_cutoff
	D1 constrained	0.43494	8.02	0.56506	1.07376	4.09496	2.5134	25156	6733	144
	R2
	400 nm_cutoff										0.56556	4.10693	2.53047	8.02	1.1015	37.3144	13.827	0.0461952	0.00634464
	D1 constrained	0.42371	8.02	0.57629	1.07996	4.02052	2.58634	18010	4414	111	0.0104889	0.092976	0.0495858	0	0.0427902	0	0.267182	0	0.000246471
	R3
	400 nm_cutoff
	D1 constrained	0.44467	8.02	0.55533	1.15078	4.20532	2.49168	26265	5740	103
Distal mutant, NT	Y25D
	R1
	400 nm_cutoff
	D1 constrained	0.70458	8.02	0.29542	1.12218	5.98225	3.96687	25900	6866	97	0.22592	6.56149	4.35358	8.15539	1.03034	37.6267	13.3612	0.046975	0.00593476
	R2										0.0982878	0.819176	0.546891	0.19147	0.129881	0.441726	0.843816	0.00110287	0.000748117
	400 nm_cutoff
	D1 constrained	0.84358	8.29078	0.15642	0.9385	7.14074	4.74029	30558	5713	112
	K31A
	R1
	400 nm_cutoff
	D1 constrained	0.70483	8.02	0.29517	1.14683	5.99125	3.85591	37854	7959	116	0.26351	6.22149	3.9478	8.04939	1.10398	37.3826	13.8416	0.0463645	0.0063589
	R2										0.044774	0.325615	0.129952	0.0415637	0.0606061	0.0965145	0.380082	0.000239407	0.000349091
	400 nm_cutoff
	D1 constrained	0.76815	8.07878	0.23185	1.06112	6.45174	4.03969	22209	4295	82
proximal mutant, NT	Q8A
	R1
	400 nm_cutoff
	D1 constrained	0.26883	8.02	0.73117	1.16204	3.00567	1.85612	18003	3793	74	0.69627	3.27032	1.96799	8.02	1.20032	37.3144	14.4338	0.0461952	0.00691381
	R2										0.0493561	0.374281	0.158201	0	0.054129	0	0.325534	0	0.000311783
	400 nm_cutoff
	D1 constrained	0.33863	8.02	0.66137	1.23859	3.53498	2.07985	20358	4526	98
	F42A
	R1
	400 nm_cutoff
	D1 constrained	0.34864	8.02	0.65136	1.10189	3.51382	2.0905	42088	10458	167	0.60846	3.81353	2.25226	8.02	1.10706	37.3144	13.8635	0.0461952	0.00637669
	R2										0.0606698	0.423859	0.228763	0	0.00731856	0	0.0458246	0	4.21549e-05
	400 nm_cutoff
	D1 constrained	0.43444	8.02	0.56556	1.11224	4.11325	2.41402	34858	8653	96
RIM mutant, NT	R16A
	R1
	400 nm_cutoff
	D1 constrained	0.63723	8.02	0.36277	1.03498	5.48604	3.74979	17417	4004	66	0.367	5.47083	3.66188	8.02	1.0736	37.3144	13.6502	0.0461952	0.00618391
	R2										0.00598212	0.0215124	0.124316	0	0.0546099	0	0.34728	0	0.000314553
	400 nm_cutoff
	D1 constrained	0.62877	8.02	0.37123	1.11221	5.45562	3.57398	25295	6051	98
	R19D
	R1
	400 nm_cutoff
	D1 constrained	0.56782	8.02	0.43218	1.10341	5.03079	3.3102	57942	14153	143	0.44006	4.97624	3.24842	8.02	1.10331	37.3144	13.84	0.0461952	0.00635507
	R2										0.011144	0.0771418	0.0873772	0	0.000141421	0	0.000887003	0	8.14587e-07
	400 nm_cutoff
	D1 constrained	0.55206	8.02	0.44794	1.10321	4.92169	3.18663	41424	10024	139
vector control over-expression	R1
	400 nm_cutoff
	D1 constrained	0.54702	8.02	0.45298	1.08995	4.88083	2.99681	50802	12177	215	0.51152	4.46593	2.81471	8.02	1.07379	37.3144	13.6533	0.0461952	0.00618503
	R2										0.0827881	0.586753	0.257535	0	0.0228537	0	0.145301	0	0.000131637
	400 nm_cutoff
	D1 constrained	0.42994	8.02	0.57006	1.05763	4.05103	2.6326	30335	15520	162
RyhB over-expression	R1
	400 nm_cutoff
	D1 constrained	0.56403	8.02	0.43597	1.16942	5.03335	2.60083	9822	2203	52	0.456895	4.87161	2.73512	8.02	1.13092	37.3144	14.0101	0.0461952	0.00651413
	R2										0.0295924	0.228738	0.189908	0	0.0544402	0	0.337306	0	0.000313575
	400 nm_cutoff
	D1 constrained	0.52218	8.02	0.47782	1.09243	4.70987	2.8694	22252	4957	121
SgrS over-expression	R1
	400 nm_cutoff
	D1 constrained	0.42947	8.02	0.57053	1.09133	4.06699	2.60126	23236	5692	130	0.509495	4.4911	3.01335	8.02	1.09405	37.3144	13.7818	0.0461952	0.00630173
	R2										0.0863165	0.599784	0.582783	0	0.00384666	0	0.0242284	0	2.21568e-05
	400 nm_cutoff
	D1 constrained	0.55154	8.02	0.44846	1.09677	4.91521	3.42544	28428	12103	115
ChiX over-expression	R1
	400 nm_cutoff
	D1 constrained	0.8308	8.27538	0.1692	0.9655	7.03855	4.48551	25527	4858	111	0.168695	7.06448	4.53754	8.30497	0.951395	37.9714	12.8516	0.0478366	0.00548004
	R2										0.000714178	0.036674	0.0735745	0.0418466	0.0199475	0.0956644	0.134734	0.000241036	0.000114897
	400 nm_cutoff
	D1 constrained	0.83181	8.33456	0.16819	0.93729	7.09041	4.58956	23115	4852	70
ChiX over-expression in Q8A Hfq	R1
	400 nm_cutoff
	D1 constrained	0.53545	8.02	0.46455	1.19586	4.84985	2.84051	22992	4966	102	0.52215	4.46258	2.6339	8.02	1.20587	37.3144	14.4689	0.0461952	0.00694581
	R2										0.0814587	0.547678	0.292184	0	0.0141563	0	0.08493	0	8.15402e-05
	400 nm_cutoff
	D1 constrained	0.42025	8.02	0.57975	1.21588	4.07531	2.4273	15359	3674	66
ChiX dAAN x1 over-expression	R1
	400 nm_cutoff
	D1 constrained	0.68854	8.09456	0.31146	1.04354	5.89845	3.95007	27176	6105	93	0.287685	6.10564	4.00277	8.15428	1.02684	37.6252	13.3514	0.0469687	0.0059146
	R2										0.0336229	0.293011	0.074522	0.0844568	0.0236174	0.194851	0.153551	0.000486471	0.000136036
	400 nm_cutoff
	D1 constrained	0.73609	8.214	0.26391	1.01014	6.31283	4.05546	31402	6695	114
ChiX dAAN x2 over-expression	R1
	400 nm_cutoff
	D1 constrained	0.66263	8.02	0.33737	1.12039	5.69228	3.65712	40964	9656	114	0.367865	5.47849	3.48335	8.02	1.11189	37.3144	13.8936	0.0461952	0.00640446
	R2										0.0431264	0.302347	0.245741	0	0.0120279	0	0.0751487	0	6.92806e-05
	400 nm_cutoff
	D1 constrained	0.60164	8.02	0.39836	1.10338	5.2647	3.30959	23319	5429	90
rne131, NT	R1
	400 nm_cutoff
	D1 constrained	0.44385	8.02	0.55615	1.1313	4.18885	2.67362	21588	5308	70
	R2
	400 nm_cutoff										0.610297	3.79555	2.39406	8.02	1.09955	37.3144	13.8154	0.0461952	0.00633339
	D1 constrained	0.3581	8.02	0.6419	1.0651	3.55565	2.25748	34063	9753	122	0.0471107	0.343339	0.24213	0	0.0331821	0	0.208692	0	0.000191129
	R3
	400 nm_cutoff
	D1 constrained	0.36716	8.02	0.63284	1.10224	3.64216	2.25107	40034	10370	145
rne131, Rif	R1
	400 nm_cutoff
	D1 constrained	0.76453	8.40615	0.23547	1.14841	6.69717	4.00342	34237	7204	78	0.242033	6.60517	4.05051	8.35529	1.12393	38.0863	13.9681	0.0481265	0.00647384
	R2										0.00769365	0.0842432	0.0924968	0.0447902	0.0265784	0.102018	0.165382	0.000257992	0
	400 nm_cutoff
	D1 constrained	0.7495	8.33797	0.2505	1.12772	6.5318	4.15708	35273	7407	91
	R3
	400 nm_cutoff
	D1 constrained	0.75987	8.32174	0.24013	1.09566	6.58654	3.99104	44903	7741	147
rne_delta14, NT	R1
	400 nm_cutoff
	D1 constrained	0.37212	8.02	0.62788	1.1205	3.68794	2.24588	31379	7265	169	0.611045	3.80012	2.3435	8.02	1.11381	37.3144	13.9057	0.0461952	0.00641552
	R2										0.0238083	0.158639	0.138063	0	0.00946816	0	0.0591047	0	5.45366e-05
	400 nm_cutoff
	D1 constrained	0.40579	8.02	0.59421	1.10711	3.91229	2.44113	49436	12705	192
rne_delta14, Rif	R1
	400 nm_cutoff
	D1 constrained	0.73951	8.26441	0.26049	1.09743	6.39748	4.03346	24301	5024	69	0.271155	6.25625	3.96739	8.17116	1.10512	37.6637	13.8513	0.0470659	0.00636552
	R2										0.0150826	0.19974	0.09343	0.131875	0.0108824	0.30394	0.0681992	0.000759602	6.26825e-05
	400 nm_cutoff
	D1 constrained	0.71818	8.07791	0.28182	1.11282	6.11501	3.90133	22487	4928	70
Q8A Hfq in rne131, NT	R1
	400 nm_cutoff
	D1 constrained	0.37325	8.02	0.62675	1.17153	3.72772	2.27193	9720	2219	45	0.66842	3.40974	2.07136	8.0219	1.12484	37.3188	13.9714	0.0462061	0.00647908
	R2										0.0589303	0.449692	0.283649	0.00267993	0.0660296	0.00623368	0.410247	1.54364e-05	0.000380331
	400 nm_cutoff
	D1 constrained	0.28991	8.02379	0.71009	1.07815	3.09176	1.87079	23053	5842	89
Q8A Hfq in rne131, Rif	R1
	400 nm_cutoff
	D1 constrained	0.69949	8.02	0.30051	1.22825	5.97901	3.7847	19599	3337	90	0.304995	5.95599	3.7282	8.02	1.2523	37.3144	14.7442	0.0461952	0.00721322
	R2										0.00634275	0.0325546	0.079896	0	0.0340048	0	0.200201	0	0.000195867
	400 nm_cutoff
	D1 constrained	0.69052	8.02	0.30948	1.27634	5.93297	3.67171	17545	3055	93
Q8A Hfq in rne_delta14, NT	R1
	400 nm_cutoff
	D1 constrained	0.36727	8.02	0.63273	1.25341	3.73858	2.20022	19862	4289	84	0.655955	3.5633	2.08695	8.02	1.22673	37.3144	14.5928	0.0461952	0.00706599
	R2										0.0328451	0.247871	0.160188	0	0.0377241	0	0.224403	0	0.000217291
	400 nm_cutoff
	D1 constrained	0.32082	8.02	0.67918	1.20006	3.38803	1.97368	26031	6246	84
Q8A Hfq in rne_delta14, Rif	R1
	400 nm_cutoff
	D1 constrained	0.67256	8.02	0.32744	1.23584	5.79859	3.78142	26391	4992	95	0.347373	5.67653	3.44271	8.02	1.25967	37.3144	14.7808	0.0461952	0.0072557
	R2										0.0743226	0.465544	0.355209	0	0.0986185	0	0.57547	0	0
	400 nm_cutoff
	D1 constrained	0.71495	8.02	0.28505	1.17515	6.06888	3.07303	14824	3211	70
	R3
	400 nm_cutoff
	D1 constrained	0.57037	8.02	0.42963	1.36802	5.16211	3.47369	31265	5119	179
Y25D Hfq in rne131, NT	R1
	400 nm_cutoff
	D1 constrained	0.77866	8.30816	0.22134	0.97613	6.68529	4.34423	21915	4870	83
	R2
	400 nm_cutoff										0.27241	6.24152	4.03892	8.18638	1.03031	37.6989	13.3717	0.0471535	0.0059346
	D1 constrained	0.69299	8.10174	0.30701	1.03993	5.93369	3.97732	13720	2934	66	0.0451473	0.393805	0.279641	0.108107	0.0500725	0.248557	0.326191	0.000622699	0.000288417
	R3
	400 nm_cutoff
	D1 constrained	0.71112	8.14923	0.28888	1.07488	6.10559	3.79522	42252	8433	149
Y25D Hfq in rne131, Rif	R1
	400 nm_cutoff
	D1 constrained	0.90161	8.93278	0.09839	0.8616	8.13866	5.04429	26435	4988	73	0.13153	7.73985	4.86041	8.76612	0.90945	39.0097	12.5611	0.0504929	0.00523843
	R2										0.046867	0.564004	0.260053	0.235686	0.0676701	0.524455	0.467645	0.00135755	0.00038978
	400 nm_cutoff
	D1 constrained	0.83533	8.59947	0.16467	0.9573	7.34103	4.67652	33728	6486	121
Y25D Hfq in rne_d14, NT	R1
	400 nm_cutoff
	D1 constrained	0.70291	8.02	0.29709	1.04172	5.94682	3.76072	14072	2744	66
	R2
	400 nm_cutoff										0.2516	6.39233	4.09962	8.19158	1.02301	37.7091	13.3265	0.0471835	0.00589256
	D1 constrained	0.77079	8.11476	0.22921	1.00103	6.48422	4.36662	58683	12658	182	0.0393971	0.407415	0.309284	0.220282	0.0205419	0.505534	0.133965	0.00126883	0.000118322
	R3
	400 nm_cutoff
	D1 constrained	0.7715	8.43999	0.2285	1.02629	6.74596	4.17153	35860	8451	88
Y25D Hfq in rne_d14, Rif	R1
	400 nm_cutoff
	D1 constrained	0.92156	9.02669	0.07844	0.80279	8.38161	5.26264	13517	2524	41	0.08861	8.22227	5.21285	8.93931	0.833605	39.3945	12.028	0.0514904	0.00480156
	R2										0.0143826	0.225343	0.0704137	0.123574	0.043579	0.272295	0.314507	0.000711786	0.000251015
	400 nm_cutoff
	D1 constrained	0.90122	8.85193	0.09878	0.86442	8.06292	5.16306	21982	4177	61

## Sheet: Sheet1
0.20714		0.82856
0.23504		0.94016
0.21901		0.87604
0.1936		0.7744
0.21254		0.85016
0.1551		0.6204
8.70968e-05		0.000348387
0.18799		0.75196
0.23474		0.93896
0.23549		0.94196
0.17975		0.719
0.14401		0.57604
0.16508		0.66032
0.15279		0.61116
