# Supplementary material for: Dynamic interactions between the RNA chaperone Hfq, small regulatory RNAs, and mRNAs in live bacterial cells
Source: eLife. 2021 Feb 22;10:e64207. doi: 10.7554/eLife.64207 (PMC7987339; doi:10.7554/eLife.64207)
Supplement: Supplementary file 2. [file elife-64207-supp2.xlsx]

## Sheet: Sheet1
Supplementary file 2. List of all strains and plasmids used in this study
Strains	Description	Reference
AZZ41	MC4100; hfqK31A	Gift from S. Gottesman Lab
DB166	∆lac X74,laq, tetR, spec in MG1655 background	Thairu et al. 2017
SP191	DB166 + pLac-mMaple3	This study
MPB57	EM1237; ΔmicA::cat	This study
DL527	EM1055 ΔrybB	Lalaouna et. al., 2015
DL92	EM1055 ΔchiX::kan	This study
DL903	EM1055 ΔmicA::cat	This study (EM1055 + p1MPB57)
DL991	EM1237; ΔcyaR::kan	Lalaouna et. al, 2018
DL999	EM1237 ΔfnrS::kan	This study
DL1029	EM1055 ΔcyaR::kan	Lalaouna et. al, 2018
DL1037	EM1055 ΔfnrS::kan	This study (EM1055 + P1DL999)
DL1071	Δara714 leu+; ΔmicA::cat	This study (EM1451 + P1DL903)
EM1055	MG1655 lacX74 (WT)	Masse and Gottesman, 2002
EM1237	DY330 [W3110 delta-lacU169 gal490 lambda-cI857 delta-(cro-bioA)]	Yu et al., 2000
EM1238	EM1055 ΔryhB::cat	Masse and Gottesman, 2002
EM1376	EM1055 rne∆14 zce-726::Tn10	Masse, Escorcia and Gottesman 2003
EM1377	EM1055 rne131 zce-726::Tn10	Masse, Escorcia and Gottesman 2003
EM1392	BL21 DE3 pLysS; p15A CmR	Sigma
EM1451	EM1055 Δara714 leu+	Desnoyers et. al., 2009
GD549	EM1055 ΔrybB::kan	Desnoyers and Massé, 2012
JF133	rne131 zce-726::Tn10; ΔryhB::cat	Prévost et. al., 2011
JF185	EM1055, rppH::tet	This study
JW4130-1	rrnB3 ∆lacZ4787 hsdR514 ∆(araBAD)567 ∆(rhaBAD)568 rph-1 ∆hfq-722::kan	Baba et al. 2006
KK2560	MG1655 hfqQ8A	Gift from S. Gottesman Lab (Zhang et al., 2013)
KK2561	MG1655 hfqR16A	Gift from S. Gottesman Lab (Zhang et al., 2013)
KK2562	MG1655 hfqY25D	Gift from S. Gottesman Lab (Zhang et al., 2013)
KP1224A	EM1055; Δhfq::kan	This study (EM1055 + P1JW4130-1)
KP1238	EM1055 Δspf::kan	This study (EM1055 + P1KP1237)
KP1867	EM1055 hfq-Linker-mMaple3 linked to Kan	This study
KP1948A	EM1055 hfqY25D-Linker-mMaple3 linked to Kan	This study
KP1952A	EM1055 hfqQ8A-Linker-mMaple3 linked to Kan	This study
KP1953	EM1055 hfqR16A-Linker-mMaple3 linked to Kan	This study
KP1954	rne131 zce-726::Tn10; hfq-Linker-mMaple3 linked to Kan	This study
KP1955	rne131 zce-726::Tn10; hfqY25D-Linker-mMaple3 linked to Kan	This study
KP1956	rne131 zce-726::Tn10; hfqQ8A-Linker-mMaple3 linked to Kan	This study
KP2044	rne∆14 zce-726::Tn10; hfq-Linker-mMaple3-Kan	This study (EM1376 + P1KP1867)
KP2045	rne∆14 zce-726::Tn10; hfqY25D-Linker-mMaple3 linked to Kan	This study (EM1376 + P1KP1948A)
KP2046	rne∆14 zce-726::Tn10; hfqQ8A-Linker-mMaple3 linked to Kan	This study (EM1376 + P1KP1952A)
KP2136	EM1055 ΔcyaR	This study
KP2137	EM1055 ΔryhB::cat; ΔfnrS::kan	This study (EM1238 + P1DL1037)
KP2140	rne131 zce-726::Tn10; ΔcyaR::kan	This study (EM1377 + P1DL1029)
KP2141	EM1055 ΔryhB::cat; ΔfnrS	This study
KP2142	rne131 zce-726::Tn10; ΔrybB	This study
KP2143	rne131 zce-726::Tn10; ΔcyaR	This study
KP2145	EM1055 ΔcyaR; ΔmicA::cat	This study (KP2136 + P1DL903)
KP2147	EM1055 ΔryhB::cat; ΔfnrS; hfq-Linker-mMaple3 linked to Kan	This study (KP2141 + P1KP1867)
KP2148	EM1055 ΔryhB::cat; ΔfnrS; hfqY25D-Linker-mMaple3 linked to Kan	This study (KP2141 + P1KP1948)
KP2149	Δara714 leu+; ΔmicA::cat; hfq-Linker-mMaple3 linked to Kan	This study (DL1071 + P1KP1867)
KP2155	rne131 zce-726::Tn10; ΔcyaR; ΔmicA::cat	This study (KP2143 + P1DL903)
KP2158	rne131 zce-726::Tn10; ΔrybB; Δspf::kan	This study (KP2142 + P1KP1238)
KP2159	EM1055 ΔrybB; Δspf::kan	This study (DL527 + P1KP1238)
KP2162	rne131 zce-726::Tn10; ΔcyaR; ΔmicA::cat; hfq-Linker-mMaple3 linked to Kan	This study (KP2155 + P1KP1867)
KP2163	rne131 zce-726::Tn10; ΔcyaR; ΔmicA::cat; hfqY25D-Linker-mMaple3 linked to Kan	This study (KP2155 + P1KP1948)
KP2167	rne131 zce-726::Tn10; ΔrybB; Δspf	This study
KP2168	EM1055 ΔrybB; Δspf	This study
KP2169	EM1055 hfqR19D-Linker-mMaple3 linked to Kan	This study (EM1055 + KP2131B)
KP2172	EM1055 ΔcyaR; ΔmicA::cat; hfq-Linker-mMaple3 linked to Kan	This study (KP2145 + P1KP1867)
KP2173	EM1055 ΔcyaR; ΔmicA::cat; hfqY25D-Linker-mMaple3 linked to Kan	This study (KP2145 + P1KP1948)
KP2174	rne131 zce-726::Tn10; ΔrybB; Δspf; ΔryhB::cat	This study (KP2167 + P1EM1238)
KP2175	EM1055 ΔrybB; Δspf; ΔryhB::cat	This study (KP2168 + P1EM1238)
KP2176	BL21 DE3 pLysS; p15A CmR; Δhfq::kan	This study (EM1392 + P1KP1224A)
KP2178	rne131 zce-726::Tn10; ΔryhB::cat; ΔfnrS::kan	This study (JF133 + P1DL1037)
KP2179	rne131 zce-726::Tn10; ΔryhB::cat; ΔfnrS	This study
KP2182	EM1055 ΔrybB; Δspf; ΔryhB::cat; hfq-Linker-mMaple3 linked to Kan	This study (KP2175 + P1KP1867)
KP2183	EM1055 ΔrybB; Δspf; ΔryhB::cat; hfqY25D-Linker-mMaple3 linked to Kan	This study (KP2175 + P1KP1948)
KP2184	rne131 zce-726::Tn10; ΔrybB; Δspf; ΔryhB::cat; hfq-Linker-mMaple3 linked to Kan	This study (KP2174 + P1KP1867)
KP2185	rne131 zce-726::Tn10; ΔrybB; Δspf; ΔryhB::cat; hfqY25D-Linker-mMaple3 linked to Kan	This study (KP2174 + P1KP1948)
KP2203	EM1055 hfqK31A-Linker-mMaple3 linked to Kan	This study
KP2205	EM1055 hfqK31A-Linker-mMaple3 linked to Kan	This study
KP2211	rne131 zce-726::Tn10; ΔryhB::cat; ΔfnrS; hfq-Linker-mMaple3 linked to Kan	This study (KP2179 + P1KP1867)
KP2212	rne131 zce-726::Tn10; ΔryhB::cat; ΔfnrS; hfqY25D-Linker-mMaple3 linked to Kan	This study (KP2179 + P1KP1948)
KP2213	EM1055 hfqF42A-Linker-mMaple3 linked to Kan	This study (EM1055 + P1KP2130A)
KP2271	EM1055 ΔrybB; Δspf; ΔryhB::cat; hfq-Linker-mMaple3	This study (KP2182 Flipped)
KP2278	EM1055 ΔryhB::cat; ΔfnrS; hfqQ8A-Linker-mMaple3 linked to Kan	This study (KP2141 + P1KP1952A)
KP2279	rne131 zce-726::Tn10; ΔryhB::cat; ΔfnrS; hfqQ8A-Linker-mMaple3 linked to Kan	This study (KP2179 + P1KP1952A)
KP2280	EM1055 ΔrybB; Δspf; ΔryhB::cat; hfqQ8A-Linker-mMaple3 linked to Kan	This study (KP2175 + P1KP1952A)
KP2281	rne131 zce-726::Tn10; ΔrybB; Δspf; ΔryhB::cat; hfqQ8A-Linker-mMaple3 linked to Kan	This study (KP2174 + P1KP1952A)
KP2282	EM1055 ΔcyaR; ΔmicA::cat; hfqQ8A-Linker-mMaple3 linked to Kan	This study (KP2145 + P1KP1952A)
KP2283	rne131 zce-726::Tn10; ΔcyaR; ΔmicA::cat; hfqQ8A-Linker-mMaple3 linked to Kan	This study (KP2155 + P1KP1952A)
KP2284	EM1055 ΔrybB; Δspf; ΔryhB::cat; hfq-Linker-mMaple3 linked to Kan; ΔrppH:tet	This study (KP2182 + P1JF185)
KP2289	EM1055 ΔrybB; Δspf; ΔryhB::cat; hfq-Linker-mMaple3; ΔchiX::kan	This study (KP2271 + P1DL92)
KP2299	EM1055 ΔrybB; Δspf; ΔryhB::cat; hfqY25D-Linker-mMaple3 linked to Kan; ΔrppH::tet	This study (KP2183 + P1JF185)
Plasmids	Description	Reference
pNM12	pBAD24 derivative (arabinose inducible promoter; AmpR)	Majdalani et al., 1998
pKD4	Template for amplification of kanamycin resistance gene	Datsenko and Wanner, 2000
pKD46	Repts, Ampr, Rec recombinase expression vector	Datsenko and Wanner, 2000
pZESA93M	Plasmid containing the lacoperator and mMaple3 gene	Gift from CK Vanderpool Lab
pLac-mMaple3	Over expression of mMaple3 through induction by IPTG	This study
pCP20	Yeast Flp recombinase gene and FLP expression vector	Cherepanov and Wackernagel, 1995
pBAD-micA	Over expression of micA through arabinose induction	This study
pBAD-ryhB	Over expression of ryhB through arabinose induction	Massé et.al., 2003
pET21b-hfq	Over expression of hfq through induction by IPTG	Prévost et. al., 2007
pET15b-RyhB	Over expression of RyhB through induction by IPTG	This study
pET15b-SgrS	Over expression of SgrS through induction by IPTG	This study
pET15b-ChiX	Over expression of ChiX through induction by IPTG	This study
pET15b-ChiX ΔAANx1	Over expression of ChiX with one AAN site deleted, through induction by IPTG	This study
pET15b-ChiX ΔAANx2	Over expression of ChiX with two AAN sites deleted, through induction by IPTG	This study
pZEFabM	sAB-70 gene upstream of mMaple3, under the control of a lac promoter	This study
pHR-scFv-GCN4-sfGFP-GB1-NLS-dWPRE	scFv-GCN4 fused to a superfolded GFP	Tanenbaum et al., 2014 (Addgene plasmid # 60906)
pZEGCN4MSD	scFv-GCN4 fused to mMaple3, under the control of a lac promoter	This study
