# Supplementary material for: Dynamic interactions between the RNA chaperone Hfq, small regulatory RNAs, and mRNAs in live bacterial cells
Source: eLife. 2021 Feb 22;10:e64207. doi: 10.7554/eLife.64207 (PMC7987339; doi:10.7554/eLife.64207)
Supplement: Supplementary file 3. [file elife-64207-supp3.xlsx]

## Sheet: Table S2
Supplementary file 3. List of all oligonucleotides used in this study
Primers	Sequence 5'-3'	Description
EM1690	ggatcgctggctccccgtgtaaaaaaacagcccgaaaccttacatatgaatatcctccttag	Rv 3'end hfq + P2 region (pKD4)
EM4293	gaagcagctccagcctacacctaattaagcttggctgcaggt	Rv P1 region (pKD4) + mMaple3
EM4313	gcagaatacttccgcgcaacaggacagcgaagaaaccgaatctggtggcggaggctctg	Fwd hfq + Linker
EM4314	tctggtggcggaggctctggtggcggaggcgtggttagcaagggcgaaga	Fwd Linker + mMaple3
EM88	tgtaatacgactcactatagggcgatcaggaagaccctcgc	Fwd T7-ryhB
EM1978	aaaaaaaaagccagcacccggctggc	Rv T7-ryhB
T7-ChiX(F)	taatacgactcactataggacaccgtcgcttaaagtgacgg	Fwd T7-chiX
T7-ChiX(R)	aaaaaaatggccaatatcgctattgg	Rv T7-chiX
T7-ptsG(F)	taatacgactcactataggcacagaattcataaataaagggcg	Fwd T7-ptsG
T7-ptsG(R)	aattgagagtgctcctgagtatgggt	Rv T7-ptsG
EM4704	ctgcaagggcaaatcgagtcttttgatcaggccgtgatcctgttgaa	Fwd construct hfqF42A
EM4705	ctttacaagatccgttcctgaacgcactgcgtcgggaagatgttccag	Fwd construct hfqR19D
EM2800	gcgaagtcaataaactctctacccattcagggcaatatcgtgtaggctggagctgcttc	Fwd fnrS knock-out
EM2801	ggactcttaaagggtagacgctgataaataacaggcaaacatatgaatatcctccttag	Rv fnrS knock-out
EM2596	ctgaactctttcttcccaggcgagtctgagtatatgtgtaggctggagctgcttc	Fwd micA knock-out
EM2597	gcggtgtggctggaaaaacacgcctgacagaaaagacatatgaatatcctccttag	Rv micA knock-out
EM2115	gtgctttctgaactgaacaaaaaagagtaaagttagtcgcgtgtaggctggagctgcttc	Fwd spf knock-out
EM2075	ggatcttttctttcgcccaataaaaaacgccccagtcattcatatgaatatcctccttag	Rv spf knock-out
EM123	gtcacacgcatatggctaaggggcaatcttta	Fwd hfq - cloning in pET21b (NdeI)
EM124	cgctcgaagcttttattcggtttcttcgctgtcctg	Rv hfq - cloning in pET21b (HindIII)
EM2651	catagcatgcaaaaaggccactcgtgagtggc	Fwd micA (MscI)
EM2652	ccatgaaagacgcgcatttgttatcatcatc	Rv micA (SphI)
EM854	gatggctaccgcccaaacgtaggtatcgtgatttgtaatcactcgacatcttggttaccg	Fwd rppH knock-out
EM855	cttaatcctacttcttcaaacaattcacggtacatcgcctgcaagagggtcattatatttcg	Rv rppH knock-out
EM2207	gagtattggcaggatggtgagattgagcgacaatcgagttgtgtaggctggagctgcttc	Fwd chiX knock-out
EM2208	caatatcgctattggcccgtcaaagaggaatttccatatgaatatcctccttag	Rv chiX knock-out
EH368	gatactcctctagcgatcaggaagaccctcgc	pET15b + ryhB
EH369	ttcctgatcgctagaggagtatcttgttatccgctcacaatg	pET15b + ryhB
EH270	gtggataaattgagaacgaaagatcaaaaaaaaagccagcacccggct	ryhB + endogenous terminator
EH271	tttttgatctttcgttctcaatttatccacctgaaaggaggaactatatccggatatcc	endogenous terminator + pET15b
EH305	atactcctctaacaccgtcgcttaaagtgacgg	pET15b + chiX
EH306	agcgacggtgttagaggagtatcttgttatccgctcacaatg	pET15b + chiX
EH376	caaatgttgcgctaaaaaaatggccaatatcgctattgg	chiX + endogenous terminator
EH375	cggcaaattcccttctcctgaaaggaggaactatatccggatatcc	pET15b + chiX endogenous terminator
EH362	gatactcctctagatgaagcaagggggtgcc	pET15b + sgrS
EH363	ccttgcttcatctagaggagtatcttgttatccgctcacaatg	pET15b + sgrS
EH374	ttttttattctcgccgcgctaaaaactgaaaggaggaactatatccggatatcc	pET15b + sgrS endogenous terminator
EH373	gtttttagcgcggcgagaataaaaaaaaccagcaggtataatctgctgg	sgrS + endogenous termiator
EH159	aataaaaaaatgaaattcctctttgacg	ChiX ΔAANX1
EH160	atgccgtcactttaagcgac	ChiX ΔAAN
EH161	aaaaaaatgaaattcctctttgacg	ChiX ΔAANX2
OSA996	ggagcactctcaattatgtccgatatccagatgacccagtcc	Forwar primer, first Fab fragment
OSA997	aaaatcacctcaacctctagttaccctttttac	Reverse primer, first Fab fragment
OSA998	ggttgaggtgattttatggagatctccgaggttcagctgg	Forwar primer, second Fab fragment
OSA999	gcctttgctcaccatgcctccgccaccagagcctccgccaccagatgtgtgagttttgtcacaagatttggg	Reverse primer,second Fab fragment
OSA992	atggtgagcaaaggcgaggaga	Forward primer, pZEFabM plasmid backbone
OSA993	aattgagagtgctcctgagtatgggt	Reverse primer, pZEFabM plasmid backbone
OSA1010	aagcacccatactcagtgccaccatgggccccgacatcgtga	Forward primer, scFv-GCN4
OSA1011	ttctcctttgctaccgcttccacctccacctggatcca	Reverse primer, scFv-GCN4
OSA1008	tgagtatgggtgctttttttacgttctcac	Forward primer, pZEGCN4MSD plasmid backbone
OSA1009	ggtagcaaaggagaaatggtggttagcaagggcgaagaaacc	Reverse primer, pZEGCN4MSD plasmid backbone
FISH Probes	Sequence 5'- 3'	Description
RyhB_1	gcgagggtcttcctgatcg	RyhB
RyhB_2	atgtcgtgctttcaggttct	RyhB
RyhB_3	ccagcacccggctggctaa	RyhB
SgrS_1	cttaaccaacgcaaccagca	SgrS
SgrS_2	catggttaatcgttgtggga	SgrS
SgrS_3	gtcaactttcagaattgcgg	SgrS
ChiX_1	cccgtcaaagaggaatttca	WT and mutant ChiX
ChiX_2	cgtcactttaagcgacggtg	WT and mutant ChiX
ChiX_3	aaatggccaatatcgctatt	WT and mutant ChiX
Northern Probes	Sequence 5'- 3'	Description
EM131	taatacgactcactatagggagattaccatacgaggactcctg	Rv sdhC for RNA probe with T7 promotor
EM132	tgttaatctggacctacagacc	Fwd sdhC for RNA probe
EM1678	gagcaatgtcgtgctttcaggttctccgcgagggtcttcctga	ryhB DNA probe
EM1692	cagagcatctttagcatatggtagtgcaggtaattcgaatg	sodB DNA probe
EM2267	ctgaaagtactttacaacccgaaggccttcttcatacacg	16S DNA probe
EM2695	ggctgttgtcttcttcatagcggtatttcaggttgaaacc	ompX DNA probe
EM3397	gttttaacgcttcaacccca	ssrA DNA probe
EM2688	gtgagtggccaaaatttcatctctgaattcagggatgatg	micA DNA probe
EM2703	gcgaaaccagccagtgccactgcaatcgcgatagctgtc	ompA DNA probe
EM2747	cccattcggaaatcgccggttataacggttcatatcacc	23S DNA probe
EM4843	ggccaatatcgctattggcccgtcaaagaggaatttc	chiX DNA probe
EM2268	cacactaccatcggcgctacggcgtttcacttctgagttc	5S DNA probe
Droplet Digital PCR	Sequence 5'- 3'	Description
16S_rRNA.ecoli.q.F2	ggaataccggtggcgaaggc	Forward ddPCR 16S
16S_rRNA.ecoli.q.R2	ctccccaggcggtcgactta	Reverse ddPCR 16S
chiX.ecoli.q.F2	ggcgcttaaagtgacggcataa	Forward ddPCR ChiX
chiX.ecoli.q.R2	caatatcgctattggcccgtcaaa	Reverse ddPCR ChiX
EM2296	gcgatcaggaagaccct	Forward ddPCR RyhB
EM2297	cccggctggctaagtaata	Reverse ddPCR RyhB
sgrS.qec.kp.F	agcgtcccacaacgattaac	Forward ddPCR SgrS
sgrS.qec.kp.R	caccaatactcagtcacacatga	Reverse ddPCR SgrS
